# Supplementary material for: Spectroscopy of cluster aerosol models: IR and UV spectra of hydrated glyoxylate with and without sea salt
Source: Royal Society of Chemistry journal article supplement (doi:10.1039/d3ea00039g), 2023-01-01
Supplement: d3ea00039g1.pdf [file d3ea00039g1.pdf]

**Supporting Information for the manuscript:**

**Spectroscopy of Cluster Aerosol Models: IR and UV Spectra of Hydrated Glyoxylate with and without Sea Salt**

*Nina K. Bersenkovitsch, Sarah Madlener, Jakob Heller, Christian van der Linde, Milan Ončák,\* and Martin K. Beyer\**

*Institut für Ionenphysik und Angewandte Physik, Universität Innsbruck, Technikerstraße 25, 6020*

*Innsbruck, Austria*

*E-mail: [milan.oncak@uibk.ac.at](mailto:milan.oncak@uibk.ac.at); [martin.beyer@uibk.ac.at](mailto:martin.beyer@uibk.ac.at)*

**Table S1:** Reaction energies  $\Delta E$  of  $\text{Na}_n\text{Cl}_{n-2}(\text{C}_2\text{HO}_3)(\text{H}_2\text{O})^+$  with  $n = 4-11$  and  $\text{Na}_n(\text{C}_2\text{HO}_3)_{n-1}(\text{H}_2\text{O})_m^+$  for  $n = 3,4$  and  $m = 1-3$  ( $m < n$ ) calculated at the MP2/aug-cc-pVDZ//B3LYP/def2TZVP level of theory. Thermal energy  $E_{\text{therm}}$  of the parent ion is also given.

| parent ion                                                               | Products                                                                                | $\Delta E$ [kJ/mol] | $E_{\text{therm}}$ [kJ/mol] |
|--------------------------------------------------------------------------|-----------------------------------------------------------------------------------------|---------------------|-----------------------------|
| $\text{Na}_6\text{Cl}_4(\text{C}_2\text{HO}_3)(\text{H}_2\text{O})^+$    | $\text{Na}_6\text{Cl}_4(\text{C}_2\text{HO}_3)^+ + \text{H}_2\text{O}$                  | 53.7                | 72.3                        |
| $\text{Na}_7\text{Cl}_5(\text{C}_2\text{HO}_3)(\text{H}_2\text{O})^+$    | $\text{Na}_7\text{Cl}_5(\text{C}_2\text{HO}_3)^+ + \text{H}_2\text{O}$                  | 52.8                | 84.1                        |
| $\text{Na}_8\text{Cl}_6(\text{C}_2\text{HO}_3)(\text{H}_2\text{O})^+$    | $\text{Na}_8\text{Cl}_6(\text{C}_2\text{HO}_3)^+ + \text{H}_2\text{O}$                  | 55.6                | 93.0                        |
| $\text{Na}_9\text{Cl}_7(\text{C}_2\text{HO}_3)(\text{H}_2\text{O})^+$    | $\text{Na}_9\text{Cl}_7(\text{C}_2\text{HO}_3)^+ + \text{H}_2\text{O}$                  | 75.0                | 101.8                       |
| $\text{Na}_{10}\text{Cl}_8(\text{C}_2\text{HO}_3)(\text{H}_2\text{O})^+$ | $\text{Na}_{10}\text{Cl}_8(\text{C}_2\text{HO}_3)^+ + \text{H}_2\text{O}$               | 51.0                | 114.5                       |
| $\text{Na}_{11}\text{Cl}_9(\text{C}_2\text{HO}_3)(\text{H}_2\text{O})^+$ | $\text{Na}_{11}\text{Cl}_9(\text{C}_2\text{HO}_3)^+ + \text{H}_2\text{O}$               | 67.0                | 123.1                       |
| $\text{Na}_3(\text{C}_2\text{HO}_3)_2(\text{H}_2\text{O})_2^+$           | $\text{Na}_2(\text{C}_2\text{HO}_3)^+ + \text{NaC}_2\text{HO}_3 + 2 \text{H}_2\text{O}$ | 279.8               | 59.1                        |

**Table S2:** Calculated wavenumber  $\tilde{\nu}$  (in  $\text{cm}^{-1}$ ) and IR intensities  $I$  (in  $\text{km}\cdot\text{mol}^{-1}$ ) for glyoxylate with attached water, isomer 1, and its gem-diol form, calculated at the B3LYP/def2TZVP level of theory; wavenumbers were scaled by a factor of 0.96.

| $\text{C}_2\text{HO}_3^-\cdot\text{H}_2\text{O}$ |       | $\text{O}_2\text{CC}(\text{OH})_2\text{H}^-$ |       |
|--------------------------------------------------|-------|----------------------------------------------|-------|
| $\tilde{\nu}$                                    | $I$   | $\tilde{\nu}$                                | $I$   |
| 39                                               | 0.5   | 58                                           | 0.4   |
| 54                                               | 8.5   | 276                                          | 11.8  |
| 76                                               | 1.1   | 342                                          | 26.8  |
| 174                                              | 10.9  | 498                                          | 2.0   |
| 253                                              | 18.3  | 528                                          | 0.8   |
| 335                                              | 22.1  | 533                                          | 29.9  |
| 349                                              | 62.0  | 554                                          | 7.1   |
| 396                                              | 0.7   | 598                                          | 110.1 |
| 553                                              | 41.9  | 785                                          | 34.1  |
| 706                                              | 182.1 | 876                                          | 9.5   |
| 782                                              | 45.3  | 1013                                         | 35.5  |
| 904                                              | 8.6   | 1059                                         | 335.0 |
| 955                                              | 2.3   | 1183                                         | 24.0  |
| 1305                                             | 111.3 | 1305                                         | 142.5 |
| 1362                                             | 73.0  | 1318                                         | 9.9   |
| 1600                                             | 438.0 | 1322                                         | 218.5 |
| 1645                                             | 362.3 | 1432                                         | 100.4 |
| 1692                                             | 222.2 | 1629                                         | 423.9 |
| 2675                                             | 228.1 | 2789                                         | 148.8 |
| 3492                                             | 176.7 | 3397                                         | 14.4  |
| 3527                                             | 180.6 | 3406                                         | 273.2 |

**Table S3:** Lowest eight electronic excitation energies  $E$  (in eV) and the respective oscillator strength  $f$  in glyoxylate and five  $C_2HO_3^- \cdot H_2O$  isomers. Calculated at the EOM-CCSD/aug-cc-pVDZ//CCSD/aug-cc-pVDZ level of theory.

|                   | $E$  | $f$    |
|-------------------|------|--------|
| <b>glyoxylate</b> | 3.72 | 0.0010 |
|                   | 4.50 | 0.0221 |
|                   | 5.18 | 0.0111 |
|                   | 5.31 | 0.0464 |
|                   | 5.45 | 0.0075 |
|                   | 5.65 | 0.0114 |
|                   | 5.71 | 0.0343 |
|                   | 5.87 | 0.0303 |
| <b>la</b>         | 3.42 | 0.0003 |
|                   | 4.56 | 0.0000 |
|                   | 5.14 | 0.0208 |
|                   | 5.35 | 0.0000 |
|                   | 5.51 | 0.0446 |
|                   | 5.67 | 0.0176 |
|                   | 5.90 | 0.0015 |
|                   | 6.12 | 0.0632 |
| <b>lb</b>         | 3.38 | 0.0004 |
|                   | 4.42 | 0.0000 |
|                   | 5.10 | 0.0193 |
|                   | 5.36 | 0.0000 |
|                   | 5.37 | 0.0609 |
|                   | 5.55 | 0.0101 |
|                   | 5.81 | 0.0026 |
|                   | 6.56 | 0.0001 |
| <b>lc</b>         | 5.22 | 0.0147 |
|                   | 5.41 | 0.0115 |
|                   | 5.74 | 0.0013 |
|                   | 5.75 | 0.0096 |
|                   | 5.81 | 0.0000 |
|                   | 6.06 | 0.0070 |
|                   | 6.13 | 0.0132 |
|                   | 6.23 | 0.0105 |
| <b>ld</b>         | 3.41 | 0.0004 |
|                   | 4.55 | 0.0000 |
|                   | 5.06 | 0.0257 |
|                   | 5.36 | 0.0000 |
|                   | 5.49 | 0.0487 |
|                   | 5.57 | 0.0263 |
|                   | 5.81 | 0.0025 |
|                   | 5.84 | 0.0193 |
| <b>le</b>         | 3.83 | 0.0015 |
|                   | 4.83 | 0.0156 |
|                   | 5.32 | 0.0604 |
|                   | 5.47 | 0.0351 |
|                   | 5.55 | 0.0050 |
|                   | 5.61 | 0.0197 |
|                   | 5.68 | 0.0055 |
|                   | 5.85 | 0.0089 |

**Table S4:** Vertical and adiabatic detachment energy (in eV) of the bare glyoxylate anion (**glyoxylate**) and the most stable isomer of glyoxylate complexed with water (**1a**). Calculated at the CCSD/aug-cc-pVDZ//B3LYP/def2TZVP level of theory. The large difference between VDE and ADE is induced by dissociation of the glyoxylate anion to CO<sub>2</sub> + CHO upon electron detachment.

|                   | VDE  | ADE  |
|-------------------|------|------|
| <b>glyoxylate</b> | 4.06 | 2.39 |
| <b>1a</b>         | 4.73 | 2.89 |

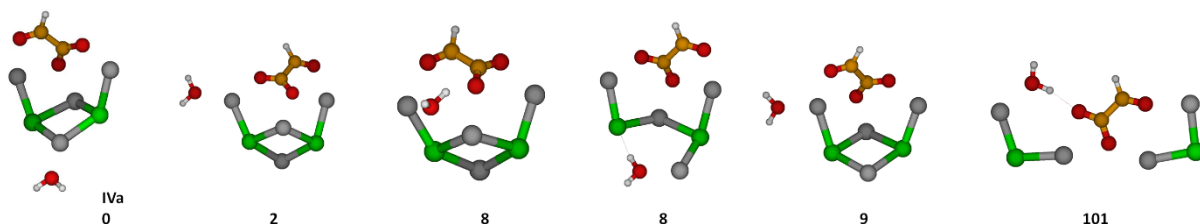

**Figure S1:** Further conformations of Na<sub>4</sub>Cl<sub>2</sub>(C<sub>2</sub>HO<sub>3</sub>)(H<sub>2</sub>O)<sup>+</sup> in addition to the ones shown in Figure 1. Calculated at the MP2/aug-cc-pVDZ//B3LYP/def2TZVP level of theory, the relative energy is given in kJ/mol. Color code: Na grey, Cl green, C orange, O red, H white.

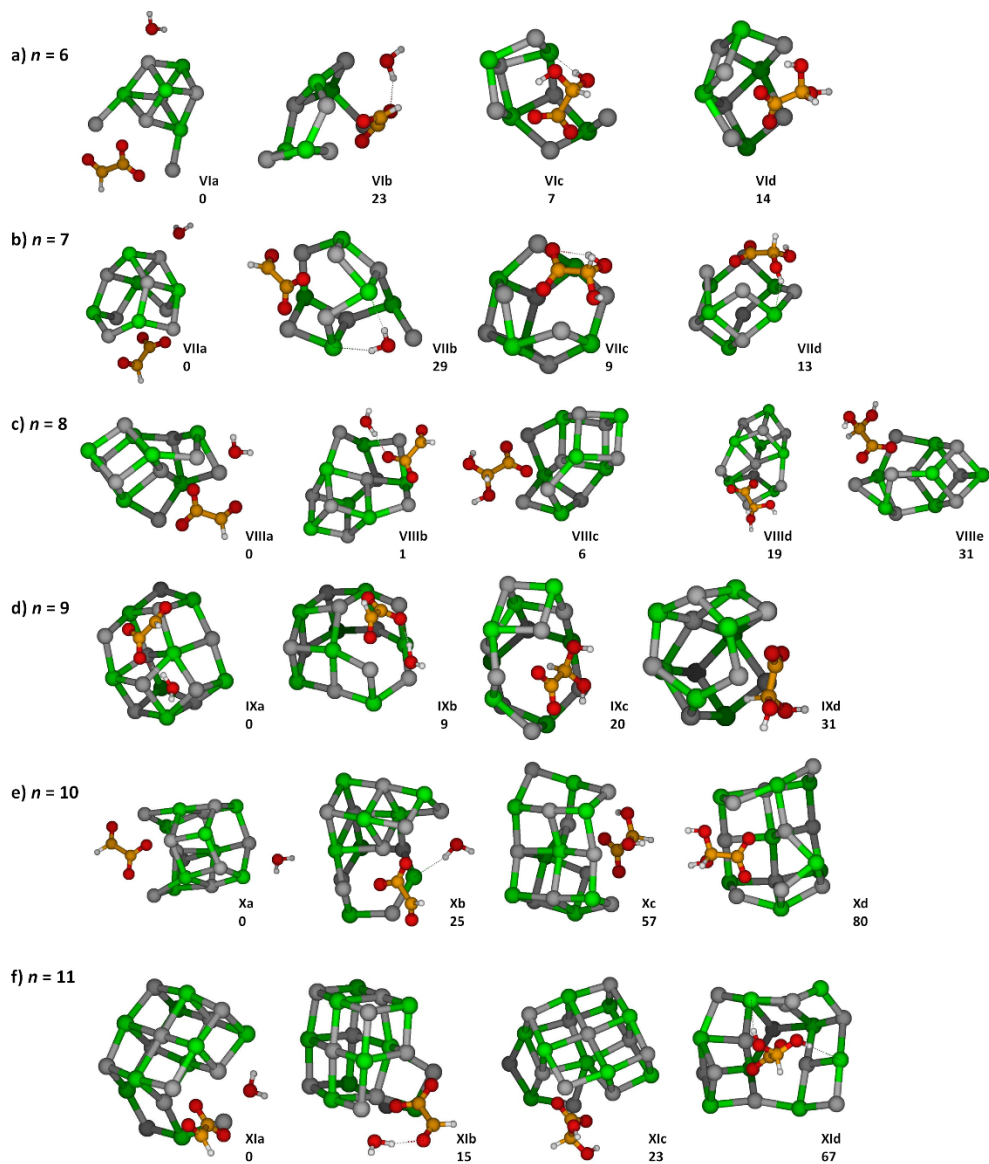

**Figure S2:** Calculated structures of  $\text{Na}_n \text{Cl}_{n-2} (\text{C}_2\text{HO}_3) (\text{H}_2\text{O})^+$ ,  $n = 6$ – $11$ . Calculated at the MP2/aug-cc-pVDZ//B3LYP/def2TZVP level of theory, the relative energy is given in kJ/mol. Color code: Na grey, Cl green, C orange, O red, H white.

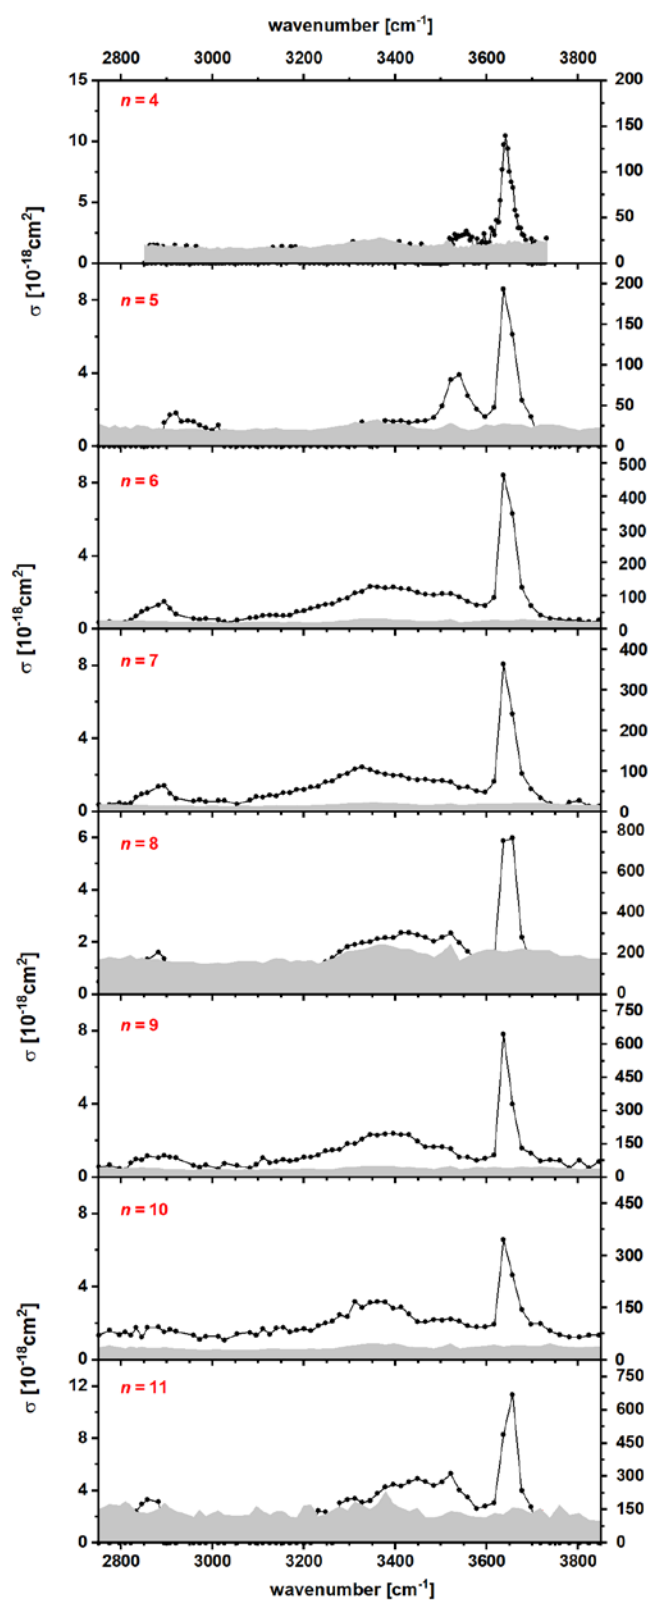

**Figure S3:** IR multiple photon dissociation spectra of the clusters  $\text{Na}_n \text{Cl}_{n-2} (\text{C}_2\text{HO}_3)(\text{H}_2\text{O})^+$  with  $n = 4-11$  with an irradiation time of 5s, analyzed assuming a 2-photon process.

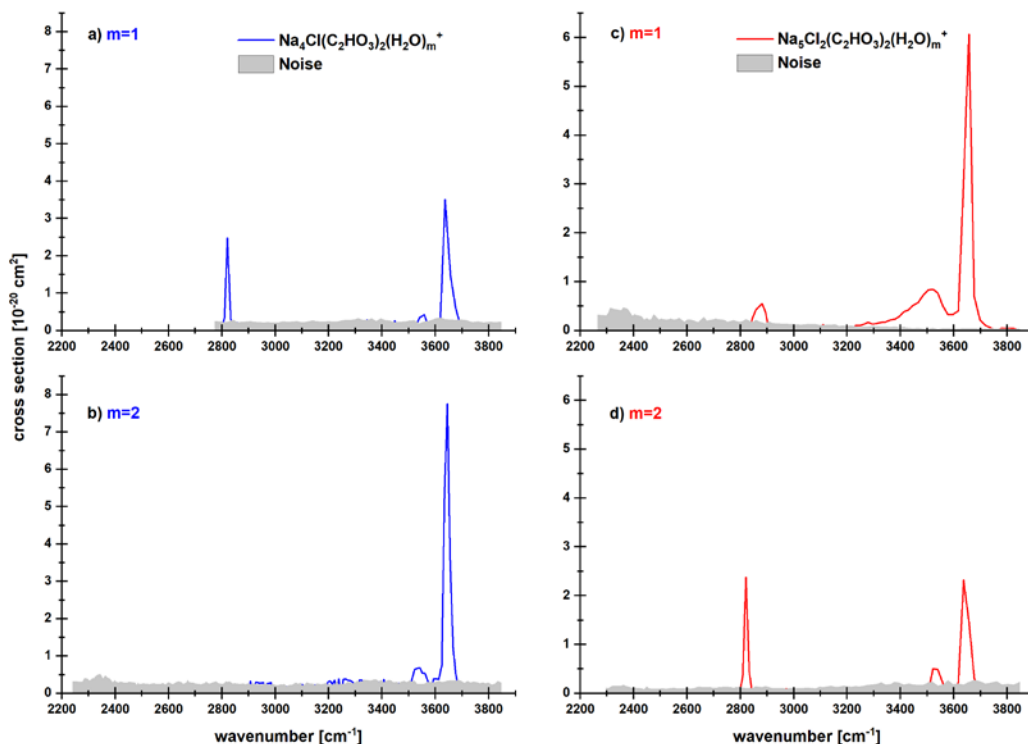

**Figure S4:** Experimental IRMPD cross section for the cluster  $\text{Na}_4\text{Cl}(\text{C}_2\text{HO}_3)_2(\text{H}_2\text{O})_m^+$  and  $\text{Na}_5\text{Cl}_2(\text{C}_2\text{HO}_3)_2(\text{H}_2\text{O})_m^+$  for **a,c)**  $m = 1$  and **b,d)**  $m = 2$  with an irradiation time of 5 s, assuming 1-photon dissociation.

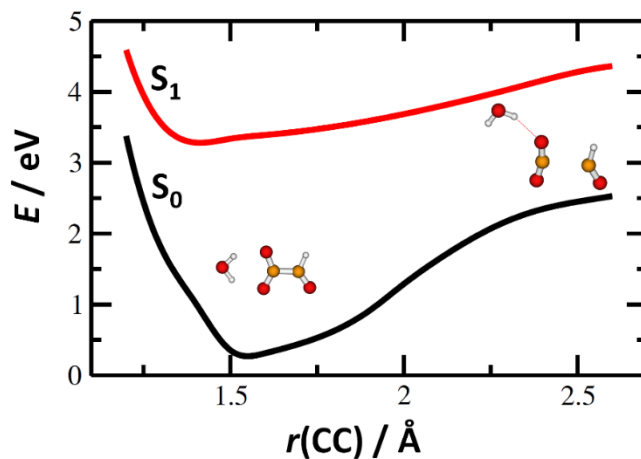

**Figure S5:** Dissociation curve of a glyoxylate anion with an attached water molecule as optimized in the  $S_1$  state at the CASSCF(6,6)/def2TZVP and single-point recalculated at the MRCI(6,6)/def2TZVP level. The zero in energy is set to the MRCI energy calculated in the structure optimized at the CCSD/aug-cc-pVDZ level. The EOM-CCSD/aug-cc-pVDZ excitation energy in the minimum is calculated as 3.42 eV.

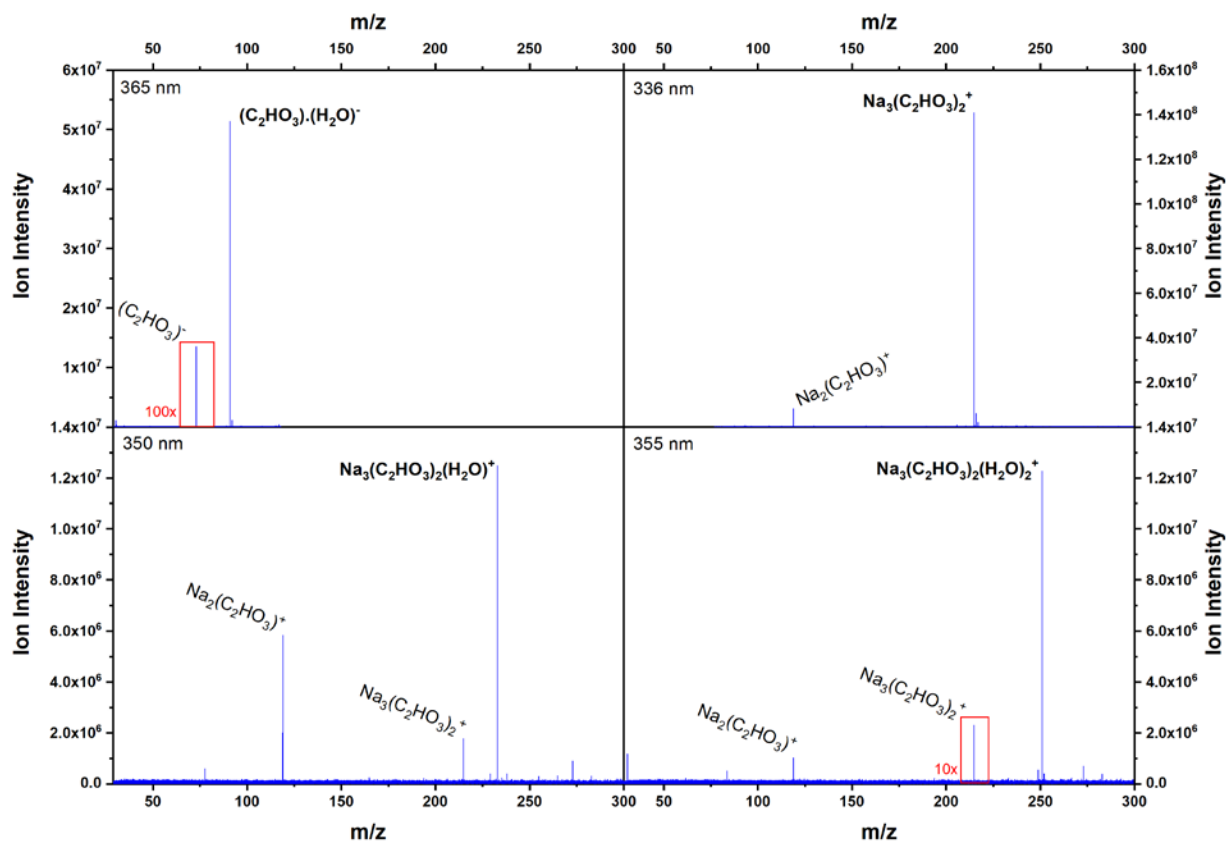

**Figure S6:** Selected mass spectra taken for the UV-spectra shown in Figure 3 and Figure 5 at the absorption maximum in the actinic region. Peaks not labeled are either electronic noise, 3<sup>rd</sup> harmonics of intense peaks, or isotopologues of the main peak.



## Cartesian coordinates (in Å) of structures along with zero-point corrected energy (in Hartree)

### CCSD/aug-cc-pVDZ

#### H2O

E = -76.441822  
O 0.000000 -0.000000 0.116885  
H -0.000000 0.765005 -0.467539  
H -0.000000 -0.765005 -0.467539

#### C2H2O3

E = -302.345327  
C 0.754147 0.758323 0.000000  
O 0.149741 1.814102 0.000000  
C -0.000000 -0.580921 -0.000000  
O 0.584247 -1.638090 -0.000000  
O -1.339303 -0.456153 -0.000000  
H 1.860064 0.680569 0.000000  
H -1.542424 0.496147 0.000000

#### C2H03-

E = -301.816483  
C 0.885009 -0.249507 0.351215  
C -0.596540 0.026510 0.027668  
O -0.980191 1.220788 0.041691  
O 1.857124 0.110423 -0.302916  
O -1.223167 -1.051370 -0.179694  
H 1.039057 -0.900747 1.254057

#### C2H03-.H2O, Ia

E = -378.086414  
C 0.692171 1.618217 0.000000  
O 1.892748 1.832628 0.000000  
C -0.000000 0.223004 0.000000  
O -1.263530 0.323540 0.000000  
O 0.734026 -0.794060 0.000000  
H -0.039879 2.465665 0.000000  
H -0.612973 -2.349623 0.000000  
O -1.565375 -2.553416 0.000000  
H -1.883124 -1.632896 0.000000

#### C2H03-.H2O, Ib

E = -378.085435  
C 1.280238 0.173644 0.000000  
O 1.322613 -1.047565 0.000000  
C 0.000000 1.066547 0.000000  
O -1.117013 0.486449 -0.000000  
O 0.286360 2.291399 0.000000  
H 2.225399 0.772771 0.000000  
H -1.460631 -1.303996 -0.000000  
O -1.481252 -2.286367 -0.000000  
H -0.531859 -2.461249 -0.000000

#### C2H03-.H2O, Ic

E = -378.083941  
C 0.029477 0.837987 0.000000  
O -0.108600 1.352536 1.145168  
O -0.108600 1.352536 -1.145168  
C 0.406517 -0.677738 -0.000000  
O -0.108600 -1.298075 -1.166041  
H 1.511579 -0.791210 -0.000000  
O -0.108600 -1.298075 1.166041  
H -0.326171 -0.520831 -1.715216  
H -0.326171 -0.520831 1.715216

#### C2H03-.H2O, Id

E = -378.082390  
C 1.043605 1.028323 0.000136  
O 0.136045 1.843386 -0.000179  
C 0.885650 -0.521321 0.000014  
O 1.992846 -1.117891 -0.000102  
O -0.288330 -0.977741 0.000095  
H 2.113262 1.360362 0.000526  
H -1.933178 -0.193631 -0.000032  
O -2.915848 -0.139678 0.000142  
H -3.153312 -1.073352 -0.001034

#### C2H03-.H2O, Ie

E = -378.077093  
C -0.021761 -0.044545 0.258854  
C 1.495748 0.068765 0.055059  
O 2.169888 -0.981904 0.160049  
O -0.823785 -0.554796 -0.524290  
O 1.825862 1.268281 -0.157552  
O -3.472845 0.094151 0.160006  
H -0.408908 0.446275 1.188628  
H -3.450043 1.023630 -0.092406  
H -2.577938 -0.221080 -0.085399

### B3LYP/def2TZVP

#### Na4C12(C2H03)(H2O)+, IVa

E = -1948.935690  
C 3.400588 -0.443275 -1.015303  
C 2.475814 0.409589 -0.122849  
O 2.432600 1.620840 -0.403254  
O 3.191970 -1.622234 -1.187734  
O 1.818672 -0.219244 0.744463  
Na 0.812213 3.087863 -0.382979  
Na -0.118698 0.166687 1.806201  
Na 1.365936 -2.410077 0.071083  
Cl -1.153552 -1.982980 0.657222  
Cl -1.398551 1.998389 0.393041  
Na -2.731456 -0.163475 -0.406640  
H 4.217746 0.084801 -1.530423  
O -4.719356 -0.562650 -1.425121  
H -5.115047 -1.435275 -1.536331  
H -5.374394 0.065974 -1.749955

#### Na4C12(C2H03)(H2O)+, IVb

E = -1948.931548  
C -2.940650 1.261040 -0.726431  
C -1.617894 1.487798 0.037675  
O -1.135665 2.631305 -0.044207  
O -3.321428 0.149168 -1.008998  
O -1.145719 0.480297 0.621514  
Na 0.982649 3.105002 0.265267  
Na 0.687871 -0.557925 1.334514  
Na -1.869025 -1.550818 -0.229255  
O -0.795854 -2.505117 1.824132  
Cl 2.581009 1.059629 0.315767  
H -3.491039 2.162961 -1.035732  
H -1.140940 -2.920620 2.624367  
H -0.257806 -3.168593 1.363009  
Cl 0.702129 -2.274725 -0.826755  
Na 2.709144 -0.810383 -1.486147

Na4Cl2(C2H03)(H2O)+, Ivc  
E = -1948.922760  
C -3.122013 -0.153613 0.104544  
C -1.755214 0.495642 0.417515  
O -1.585064 1.668935 0.027139  
O -2.798590 -1.341594 -0.668755  
O -0.916636 -0.236866 1.006772  
Na 0.157482 2.950764 -0.279132  
Na 1.245092 -0.113407 1.548661  
Na -0.820582 -2.307705 -0.050326  
Cl 2.410679 1.705522 -0.011515  
Na 3.270801 -0.446924 -1.208332  
Cl 1.805344 -2.202448 -0.013230  
O -3.965971 0.675506 -0.590924  
H -3.603971 -1.592972 -1.139448  
H -3.439471 1.425665 -0.911331  
H -3.616226 -0.474986 1.025659

Na4Cl2(C2H03)(H2O)+, IVd  
E = -1948.919505  
C 2.539033 -0.890762 -0.053425  
C 1.141644 -1.540562 0.037676  
O 0.766140 -2.167558 -0.969653  
O 2.742024 0.041939 0.979009  
O 0.482297 -1.355896 1.101002  
Na -1.343455 -2.595536 -0.329017  
Na -0.989165 0.249397 1.624151  
Na 2.256664 1.951775 -0.314188  
Cl -0.284256 2.378950 0.161939  
Cl -2.933487 -0.540472 0.008578  
Na -2.473584 1.743441 -1.101219  
O 2.627147 -0.136448 -1.256404  
H 2.263007 -0.685892 -1.966377  
H 2.135698 -0.221478 1.690786  
H 3.322949 -1.654959 -0.037336

Na4Cl2(C2H03)(H2O)+, further isomer  
E = -1948.935244  
C 0.650440 3.097140 -0.535529  
O 1.810885 3.026190 -0.870432  
C -0.021555 1.965577 0.268665  
O 0.756349 1.232075 0.932649  
O -1.250041 1.860948 0.120828  
Na -2.735072 0.236106 -0.107225  
Na 0.508205 -0.899346 1.552669  
Na 2.863360 1.093452 -0.034264  
Cl -1.345883 -2.014275 0.027518  
Cl 2.604203 -1.529685 0.005821  
Na 0.769359 -2.892260 -1.196779  
H 0.008231 3.938086 -0.840018  
H -5.536689 1.201214 -0.179837  
O -5.001363 0.399284 -0.193147  
H -5.627291 -0.333727 -0.223316

Na4Cl2(C2H03)(H2O)+, further isomer  
E = -1948.928358  
O -0.165104 2.727484 -0.745377  
C -0.949669 1.919826 -0.221396  
O -0.773923 1.247974 0.829642  
H -2.603826 2.541874 -1.613196  
C -2.244449 1.687630 -1.018873  
O -2.796805 0.611555 -1.058035  
Na 1.904114 2.560513 0.028476  
Cl -0.003127 -2.415409 -0.547057  
O -2.091140 -0.761062 1.896585  
H -2.604706 -0.780902 2.711527  
H -1.914826 0.179631 1.659270  
Na 0.425796 -0.638927 1.408269  
Na 2.416428 -1.833150 -1.193870

Na -2.442266 -1.531671 -0.290788  
Cl 2.800718 0.161447 0.419323

Na4Cl2(C2H03)(H2O)+, further isomer  
E = -1948.931912  
Cl 1.086721 -2.303622 0.458624  
O 3.784038 0.471328 -1.012726  
H 4.562427 0.969989 -1.281692  
H 3.149035 1.127798 -0.648192  
Cl 1.560263 2.204955 0.357608  
Na 0.491717 0.110097 1.438441  
Na -0.713033 3.222686 -0.254469  
O -2.350031 1.757899 -0.265686  
C -2.390780 0.540412 -0.022544  
O -1.607476 -0.147028 0.682760  
Na -1.537016 -2.380984 0.118638  
O -3.450991 -1.443508 -0.878805  
C -3.515342 -0.244789 -0.732216  
H -4.349964 0.347676 -1.137338  
Na 3.219441 -1.647378 -0.801202

Na4Cl2(C2H03)(H2O)+, further isomer  
E = -1948.933450  
C 1.394502 2.713733 -0.586528  
C 0.228088 2.069545 0.189296  
O -0.882740 2.609928 0.028011  
O 2.366192 2.070871 -0.906345  
O 0.507615 1.038018 0.847959  
Na -2.932231 1.903642 -0.142755  
Na -0.735021 -0.689398 1.510292  
Na 2.329544 -0.171316 -0.077534  
O 4.404753 -1.044049 0.242407  
Cl -2.974790 -0.682471 0.057759  
Cl 0.659565 -2.307275 -0.056298  
Na -1.630183 -2.535538 -1.201040  
H 1.267956 3.767485 -0.881197  
H 5.274779 -0.629447 0.233621  
H 4.560805 -1.991462 0.331297

Na4Cl2(C2H03)(H2O)+, further isomer  
E = -1948.905421  
C 1.135454 1.618067 0.000277  
O 2.323233 1.395527 0.000236  
C 0.073463 0.497522 0.000377  
O 0.471448 -0.696229 0.000476  
O -1.109280 0.883872 0.000379  
Na -1.849553 -1.398923 0.000525  
Na 2.564994 -1.511172 -0.000194  
Na 4.670141 1.470441 0.000001  
Cl 5.009125 -0.979033 -0.000423  
O -3.578999 2.283223 -0.000286  
Na -5.204605 0.741205 -0.000775  
Cl -4.341000 -1.595912 0.000030  
H 0.733677 2.643757 0.000242  
H -2.664719 1.945052 -0.000005  
H -3.522554 3.243510 0.000943

Na5Cl3(C2H03)(H2O)+, Va  
E = -2571.601077  
C -0.672291 1.876169 -1.140920  
O -1.703818 1.951150 -0.509707  
C 0.702295 1.818123 -0.442505  
O 1.689850 1.593432 -1.174205  
O 0.717732 1.973591 0.804808  
Na -1.262107 1.546756 1.851808  
Na 2.080515 -0.581547 -1.929785  
Na 2.991183 1.369304 0.859680  
Na -2.727040 -1.331858 -0.392956  
Cl 3.032034 -1.178482 0.476755

Cl -1.638636 -1.005014 2.005481  
Cl -0.364752 -1.458796 -1.568433  
Na 0.567300 -2.003617 0.918757  
H -0.659563 1.843631 -2.239116  
O -4.039149 0.377287 -1.076082  
H -3.550071 1.212573 -1.116067  
H -4.922625 0.543906 -1.419969

Na5Cl3(C2H03)(H2O)+, Vb

E = -2571.606638  
C -3.883917 -2.043560 -0.422027  
O -3.340188 -3.117560 -0.317303  
C -3.112357 -0.711374 -0.264443  
O -1.867714 -0.805369 -0.123729  
O -3.820243 0.311349 -0.281906  
Na -3.265348 2.380372 0.106377  
Na 0.120913 0.354458 0.170627  
Na -1.051037 -2.957743 0.121007  
Cl -0.817216 2.949168 0.540123  
Cl 1.296160 -2.077805 0.656537  
Na 3.524263 -0.970332 -0.067392  
O 5.660764 -1.763038 -0.094602  
H -4.963118 -1.954533 -0.621771  
H 6.444856 -1.326946 -0.447285  
H 5.963181 -2.610925 0.250690  
Na 1.549955 3.655482 -0.145014  
Cl 2.568443 1.383599 -0.641610

Na5Cl3(C2H03)(H2O)+, Vc

E = -2571.594405  
C -2.145450 0.698216 -1.395186  
O -1.756424 -0.588816 -1.859064  
O -3.118679 0.510310 -0.405503  
C -0.927769 1.459077 -0.812265  
O -1.056969 2.050521 0.289445  
O 0.112004 1.435399 -1.510655  
Na -2.287971 0.842037 1.775960  
Na 2.085044 0.193023 -1.645116  
Na 1.111535 2.795989 0.377072  
Na -1.155528 -2.343370 -0.356652  
Cl 1.333247 -2.226917 -1.077181  
Cl 2.885878 0.993220 0.737090  
Na 1.709065 -1.288089 1.428424  
Cl -0.901011 -1.324004 2.059506  
H -0.980268 -0.477772 -2.428451  
H -3.959279 0.278079 -0.818737  
H -2.552132 1.282026 -2.228508

Na5Cl3(C2H03)(H2O)+, Vd

E = -2571.592940  
C 3.734889 -0.326065 0.747806  
O 4.899562 0.381044 0.562008  
O 3.748157 -1.554555 -0.020602  
C 2.478509 0.452583 0.292020  
O 1.395422 -0.187970 0.272211  
O 2.654667 1.646857 -0.026113  
Na 1.206609 3.192435 -0.530448  
Na 1.650086 -2.389440 -0.333485  
Na -0.876427 -0.026928 -0.007887  
Cl -1.286028 2.638701 -0.554502  
Na -3.684619 2.222778 0.250829  
Cl -3.531756 -0.258768 0.828729  
Na -3.297927 -2.693446 0.056242  
Cl -0.877858 -2.681037 -0.753120  
H 4.678454 1.171329 0.042845  
H 4.664329 -1.859979 -0.034551  
H 3.645329 -0.594109 1.806123

Na6Cl4(C2H03)(H2O)+, VIa

E = -3194.274531  
C 4.773248 -0.973142 -0.168594  
C 3.689242 0.014466 0.311579  
O 3.941735 1.218040 0.120575  
O 4.500095 -2.117830 -0.447650  
O 2.648020 -0.502338 0.786892  
Na 2.673784 2.935153 -0.310386  
Na 2.238568 -2.626064 -0.048226  
Na 0.520682 0.146867 1.219745  
Cl 0.189218 2.235790 -0.610501  
Cl -0.230850 -1.875594 -0.567546  
Na -2.394115 2.177577 0.528640  
Cl -1.798157 0.410259 2.354510  
Na -2.778486 -1.366642 0.614282  
H 5.789687 -0.569617 -0.294667  
Na -0.958651 0.217591 -2.090314  
Cl -3.384093 0.566382 -1.287104  
O -4.778486 -2.155908 -0.088176  
H -5.509858 -2.768852 0.035688  
H -5.059308 -1.500715 -0.742305

Na6Cl4(C2H03)(H2O)+, VIb

E = -3194.267352  
C 0.967680 -2.881201 -0.755258  
O 0.117807 -2.927147 0.102337  
C 1.380526 -1.571444 -1.432553  
O 0.500190 -0.813443 -1.904764  
O 2.612573 -1.349420 -1.416358  
Na -1.690758 -0.390859 -1.655558  
Na 2.673170 0.576084 1.789106  
Na -1.241854 -1.888275 1.641083  
Na 2.309247 0.840291 -2.160039  
Cl 2.304613 2.393439 -0.110461  
Cl -3.343640 -1.462990 0.133123  
Na -4.233694 0.942959 0.311953  
Cl -2.277278 2.099314 -0.912176  
Na -0.201441 2.385632 0.671521  
Cl 0.081813 0.275959 2.290735  
H 1.543356 -3.776385 -1.043218  
O 3.918793 -1.139383 1.022068  
H 3.657816 -1.397130 0.116801  
H 4.739693 -1.596867 1.227542

Na6Cl4(C2H03)(H2O)+, VIc

E = -3194.262924  
C 0.147089 2.593071 0.009717  
O -1.256280 2.598113 -0.127920  
O 0.762443 2.147729 -1.179541  
C 0.537971 1.699761 1.224176  
O 1.751072 1.388289 1.316747  
O -0.392028 1.348256 1.978915  
Na -1.698126 -0.392256 2.298826  
Na 2.226263 -0.788253 1.795921  
Na 3.017617 1.612081 -0.591662  
Na -2.567002 1.269269 -1.515838  
Cl 3.537086 -0.932376 -0.505538  
Na 1.333168 -1.950073 -1.359034  
Cl -3.545896 -0.237178 0.425848  
Na -2.111138 -2.111081 -0.634526  
Cl -0.007851 -2.219242 1.075801  
Cl -0.719564 -0.543919 -2.329298  
H 0.514423 3.611314 0.166766  
H 0.338540 1.316495 -1.480098  
H -1.577774 2.275688 0.737983

Na6Cl4(C2H03)(H2O)+, VIId

E = -3194.264067  
C -1.403840 2.658655 0.292147

O -0.700203 2.808708 -0.927486  
C -0.618548 1.709925 1.239850  
O -1.329274 1.011297 1.990347  
O -2.663649 2.094211 -0.013188  
O 0.630401 1.721179 1.159364  
Na 1.475194 1.780589 -0.994046  
Na -1.548456 -1.195718 2.082107  
Na 2.123936 0.232782 1.959828  
Na -2.222675 0.419412 -1.634411  
Cl -2.948703 -1.617068 -0.119685  
Na -0.746120 -2.670256 -0.904829  
Cl 0.902531 -2.161382 1.182254  
Cl 3.660110 0.581717 -0.135160  
Na 2.525947 -1.536528 -0.981571  
Cl 0.293387 -0.537070 -2.212413  
H -1.008811 3.608104 -1.372180  
H -2.936145 1.603904 0.783264  
H -1.529524 3.634931 0.771864

Na7Cl15(C2H03)(H2O)+, VIIa

E = -3816.952883  
C 3.898053 -0.119107 -1.240920  
O 4.084548 -0.061036 -0.045853  
C 2.488789 -0.124464 -1.820993  
O 1.937157 -1.239296 -1.963709  
O 1.974627 0.988350 -2.075114  
Na 1.115003 -2.887971 -0.686779  
Na 1.201202 2.780684 -0.974771  
Na 2.769920 0.061486 1.871770  
Na -0.189277 -0.108240 -2.332398  
Cl 1.398783 -2.189610 1.818531  
Cl 1.471093 2.337633 1.590051  
Na -1.139375 2.114297 1.626200  
Cl -2.758269 0.165471 2.163465  
Na -1.201591 -1.876376 1.828748  
Na -3.240900 0.033045 -0.434020  
O -5.205504 -0.147677 -1.591569  
Cl -1.387871 1.988035 -1.136514  
Cl -1.452297 -2.039994 -0.936067  
H 4.742828 -0.170197 -1.949046  
H -5.617631 -0.969462 -1.881846  
H -5.852124 0.546065 -1.764829

Na7Cl15(C2H03)(H2O)+, VIIb

E = -3816.940007  
C -4.093411 -0.013070 -0.647827  
C -2.791055 -0.027022 -1.439011  
O -2.298390 -1.147703 -1.698974  
O -4.093633 0.016667 0.563231  
O -2.293315 1.082686 -1.733974  
Na -1.339423 2.862277 -0.766592  
Na -1.344379 -2.891305 -0.668938  
Na -2.455026 0.047667 2.217000  
Na -0.196159 -0.043427 -2.331445  
Cl -1.120795 -2.188334 1.854239  
Cl -1.108769 2.262638 1.782091  
Na 1.424969 -1.886496 1.322461  
Cl 3.162691 0.031911 1.843502  
Na 1.436637 1.943134 1.259403  
O 3.585378 -0.040722 -1.947479  
Cl 1.159270 2.101551 -1.420084  
Cl 1.154476 -2.158764 -1.348895  
H -5.038178 -0.032559 -1.217680  
H 2.987216 -0.809300 -1.973697  
H 2.986807 0.726428 -1.996817  
Na 4.834636 -0.010439 -0.108047

Na7Cl15(C2H03)(H2O)+, VIIC

E = -3816.942604  
C -3.622862 -0.218626 -0.427189  
C -2.464829 0.327828 -1.296373  
O -2.355105 1.569905 -1.308423  
O -3.443655 -1.582977 -0.200338  
O -3.605944 0.444258 0.841372  
O -1.724711 -0.501983 -1.880548  
Na -0.779504 2.959493 -0.619044  
Na 0.239529 0.091334 -2.714203  
Na -1.214076 -2.414205 -0.719143  
Na -1.781717 0.034803 2.328744  
Cl -0.554315 -2.216860 1.841593  
Na 1.949049 -2.220104 1.160388  
Cl 3.598819 -0.200265 1.342796  
Na 3.391021 -0.094809 -1.233164  
Na 1.992677 1.845286 1.377295  
Cl -0.516566 2.319806 1.921005  
Cl 1.636604 1.987975 -1.439249  
Cl 1.495365 -1.992634 -1.584985  
H -4.579277 -0.021548 -0.923788  
H -4.229184 -1.949014 0.224935  
H -3.615268 1.395577 0.654383

Na7Cl15(C2H03)(H2O)+, VIId

E = -3816.936378  
C 3.534513 -0.224629 0.380030  
O 3.548403 0.854156 -0.555608  
C 2.346992 -0.013358 1.360798  
O 1.744169 -1.034112 1.778864  
O 3.485105 -1.430723 -0.319002  
O 2.082622 1.172473 1.659136  
Na 0.506972 2.693610 1.445665  
Na -0.280861 -0.687890 2.611329  
Na 1.402458 -2.681049 0.273415  
Na 1.806387 1.109689 -2.202322  
Cl 0.259389 2.950013 -1.163638  
Na -2.185540 2.092128 -0.842289  
Cl -3.463840 -0.069048 -1.523422  
Na -3.388433 -0.722321 0.985725  
Na -1.578992 -1.849475 -1.784025  
Cl 0.975777 -1.419416 -2.197082  
Cl -1.845824 1.351637 1.868037  
Cl -1.342925 -2.500070 0.891274  
H 4.463602 -0.231928 0.959055  
H 2.955684 -1.311083 -1.129664  
H 3.403575 1.652002 -0.021817

Na8Cl16(C2H03)(H2O)+, VIIIA

E = -4439.615341  
C 4.034948 1.405133 -1.583368  
C 2.509131 1.357190 -1.456620  
O 1.959466 2.465389 -1.533257  
O 4.731342 0.891470 -0.733842  
O 1.995131 0.242666 -1.158703  
Na 0.631777 3.366195 0.025743  
Na 1.544802 -2.011607 -1.474086  
Na 3.364866 -0.027325 0.959084  
Na -0.086945 0.191739 0.093131  
Cl -1.087857 -1.555507 -1.775106  
Cl -1.751350 2.325535 -0.541307  
Cl 1.804515 -2.108955 1.341165  
Na -3.554720 1.201997 1.111325  
Cl -4.675061 -0.328352 -0.691305  
Na -2.774177 0.504183 -2.285108  
Na -2.950702 -2.146582 0.080372  
Cl -1.932015 -0.690250 2.108716  
Na 0.482657 -0.661171 3.156277  
Cl 1.435550 1.609933 1.991832

H 4.465637 1.999876 -2.404152  
O 2.861109 -3.834785 -1.220125  
H 2.897398 -3.973848 -0.263231  
H 3.268699 -4.600497 -1.637305

Na8Cl6(C2H03)(H2O)+, VIIIB

E = -4439.613109  
C -4.506946 -0.972054 -1.256256  
O -4.996818 -0.248787 -0.416589  
C -2.987180 -1.178087 -1.310555  
O -2.266445 -0.155906 -1.108339  
O -2.636172 -2.358826 -1.424824  
Na -1.105473 -3.178117 -0.022260  
Na -0.736968 3.286223 -0.961166  
Na -3.280054 0.590334 0.993458  
Na -0.102694 0.000112 -0.014714  
Cl -1.283488 2.291003 1.440872  
Cl 1.270861 -2.285421 -0.827927  
Na -0.227871 0.541693 3.213280  
Cl 2.148616 0.262651 2.164259  
Na 3.293061 -1.761546 0.859607  
Cl 4.682955 -0.301511 -0.818785  
Na 2.607346 -0.510885 -2.385292  
Na 3.387172 1.683871 0.286402  
Cl 1.393358 1.786069 -1.536950  
Cl -1.614873 -1.391603 1.988283  
H -5.126764 -1.578268 -1.935370  
O -2.451667 2.408617 -2.107624  
H -2.506523 1.449772 -1.904440  
H -2.929150 2.559805 -2.928561

Na8Cl6(C2H03)(H2O)+, VIIIC

E = -4439.608383  
C 4.192073 -1.249249 0.988088  
C 2.746189 -1.294996 0.446200  
O 2.525527 -2.090543 -0.481678  
O 4.687173 0.024457 0.489054  
O 1.942069 -0.440413 0.922682  
Na 1.172322 -1.856109 -2.245668  
Na 1.100860 0.833196 2.623837  
Na 3.052321 1.446048 -0.335639  
Na -0.182719 0.138022 -0.098594  
Cl -1.326523 -0.217517 2.411315  
Cl -1.302946 -2.091854 -1.274317  
Cl 1.149401 2.841716 0.871935  
Na -3.437694 -0.521162 -1.773343  
Cl -4.673001 -1.013251 0.481595  
Na -2.512603 -2.321232 1.154679  
Na -3.441502 1.115457 1.391727  
Cl -2.341358 1.798031 -0.967356  
Na -0.072582 3.025661 -1.507722  
Cl 1.353741 0.867123 -2.353087  
O 4.958960 -2.296484 0.547546  
H 4.514725 -2.666336 -0.234599  
H 5.651549 -0.010047 0.534806  
H 4.223566 -1.225200 2.079735

Na8Cl6(C2H03)(H2O)+, VIIID

E = -4439.609201  
C -3.994296 -1.645611 -0.081210  
O -3.601006 -2.083343 -1.366338  
C -2.730704 -1.359446 0.754392  
O -1.812087 -0.763183 0.113538  
O -4.647350 -0.374916 -0.159576  
O -2.751181 -1.612695 1.962495  
Na -1.077992 -0.362920 2.903719  
Na -1.559562 -0.968120 -2.186093  
Na -3.034773 1.409140 -0.037623  
Na 0.236930 0.299231 0.051894

Cl -1.359696 1.787264 -2.027423  
Cl 1.058027 -1.533579 -1.874105  
Cl 1.432168 -0.985899 2.188892  
Na 0.013141 3.395247 -0.349772  
Cl 2.326231 2.092957 -0.348436  
Na 3.534801 0.578472 1.531451  
Cl 4.590640 -1.109805 -0.171840  
Na 2.439927 -2.546753 0.218421  
Na 3.183170 0.129318 -2.006581  
Cl -1.205401 2.152646 1.748426  
H -4.319022 -2.571037 -1.787599  
H -5.604705 -0.480276 -0.202276  
H -4.638824 -2.375938 0.406490

Na9Cl7(C2H03)(H2O)+, IXa

E = -5062.282467  
C 2.681677 -2.512366 -2.224958  
C 1.891916 -2.739813 -0.927719  
O 0.787568 -3.311274 -1.067137  
O 3.243362 -1.462845 -2.435112  
O 2.392075 -2.262341 0.114474  
Na 2.074698 -1.924980 2.281290  
Na 2.828427 0.106670 -0.673863  
Na -2.168299 -0.438229 -2.370072  
Na -1.059492 -2.360508 0.054415  
Cl -3.504036 -0.987334 -0.026820  
Cl 0.082533 0.097739 -0.833654  
Cl -0.559628 -1.742930 2.649097  
Cl -2.403386 2.210725 -2.510330  
Na 0.165137 2.538130 -2.024398  
Cl 2.662964 2.832733 -1.144416  
Na 3.478912 3.063542 1.259425  
Cl 2.732329 0.715644 2.124493  
Na -3.382541 1.771380 -0.111538  
Cl -2.309033 1.938027 2.275934  
Na -2.995950 -0.584051 2.574244  
Na 0.020550 0.820259 1.825811  
H 2.656378 -3.317391 -2.978328  
O -1.440442 -2.683065 -2.482443  
H -0.530619 -3.012531 -2.321843  
H -1.933300 -3.413387 -2.873657

Na9Cl7(C2H03)(H2O)+, IXb

E = -5062.287146  
H 3.629569 -0.819381 -3.757022  
C 3.489637 -0.522027 -2.704375  
O 3.870550 0.552648 -2.297638  
C 2.726314 -1.496417 -1.809175  
O 3.283050 -1.904673 -0.759452  
O 1.570100 -1.780106 -2.184410  
Cl -1.264018 -3.017089 -0.443807  
Na 1.397115 -3.061393 0.029018  
Cl 1.081539 -1.871265 2.415650  
Na 3.217080 1.692047 -0.364058  
Na 2.804488 0.067846 2.692753  
Cl 2.385048 2.555793 2.006011  
Cl 0.593294 1.688475 -1.344931  
Na -1.510475 -2.137939 2.127245  
Na 0.060073 3.078343 0.997307  
Cl -2.455835 3.457784 0.395621  
Na -3.831101 1.258708 0.584726  
Na -1.826858 2.596520 -1.994215  
Cl -3.880868 -1.074402 1.737942  
Na -0.479758 -0.823391 -1.925149  
Cl -3.055901 0.224247 -1.929026  
Na -3.714493 -2.071401 -0.691136  
O 4.340890 -0.125593 0.903857  
H 5.300138 -0.111866 0.998448  
H 4.125702 -0.869296 0.282800

Na9Cl7(C2H03)(H2O)+, IXc  
E = -5062.275219  
C 0.366951 -1.294522 1.717035  
C 0.610163 -2.585594 0.887344  
O -0.348025 -2.997242 0.189458  
O 1.338311 -1.166348 2.722215  
O -0.938981 -1.203124 2.260614  
O 1.771212 -3.038845 0.938651  
Na 3.422441 -2.120293 -0.251487  
Na -0.155498 -2.851234 -2.071934  
Na -2.478560 -2.199086 0.473713  
Na 2.428502 0.953583 2.603388  
Cl 4.106556 0.231569 0.695272  
Cl 1.821626 -1.102577 -2.206233  
Cl -2.262504 -1.252947 -2.154614  
Na 3.243830 1.183048 -1.608596  
Cl 1.340633 2.843085 -2.035425  
Na -0.034376 3.648929 0.027693  
Cl -4.199749 -0.453715 1.324355  
Na -2.117210 1.115872 1.906284  
Na -4.096049 0.484486 -1.105791  
Cl 0.251693 2.352732 2.314966  
Cl -2.199550 2.247805 -0.638577  
Na -0.435392 0.864232 -2.275558  
H -0.961681 -1.690459 3.096890  
H 0.433434 -0.449957 1.023600  
H 1.932855 -1.930504 2.595261

Na9Cl7(C2H03)(H2O)+, IXd  
E = -5062.272998  
C 0.934315 -2.710948 -0.953196  
O 0.198496 -3.240015 -2.027491  
O 2.101860 -3.444590 -0.665790  
C 0.003054 -2.571900 0.278632  
O -1.225375 -2.513893 0.072071  
O 0.590287 -2.455480 1.385491  
Na -3.143426 -1.948058 1.051157  
Na -0.105839 -1.128762 3.090458  
Na 2.821128 -1.762637 1.112068  
Na -1.768827 -1.631236 -2.081311  
Cl -4.089424 -0.789529 -1.055862  
Cl -2.253578 0.188168 2.402386  
Na -3.790484 1.377691 0.392547  
Cl -2.118396 3.277485 -0.022780  
Na -0.216894 2.109358 1.426588  
Cl 1.685774 2.923073 -0.565784  
Na -0.600505 2.769681 -2.039714  
Cl -0.015170 0.293766 -2.868302  
Na 2.456771 0.932447 -2.202472  
Cl 4.127096 -0.201185 -0.540777  
Na 3.528719 1.840631 0.994020  
Cl 1.848642 0.548356 2.602955  
H 1.857985 -4.345548 -0.409826  
H 1.295559 -1.707963 -1.206564  
H 0.768937 -3.250114 -2.808445

Na10Cl8(C2H03)(H2O)+, Xa  
E = -5684.965276  
C -5.284870 0.631954 0.376052  
C -3.986147 0.056954 0.983112  
O -2.909872 0.625296 0.627889  
O -5.267699 1.363859 -0.584215  
O -4.124787 -0.926811 1.720877  
Na -2.472640 -2.376010 2.129355  
Na -1.110407 1.768668 1.899212  
Na -3.118134 1.754918 -1.495391  
Na -1.032022 -0.465990 -0.327519  
Cl -0.632829 2.503364 -0.707840  
Cl -1.324212 -3.275153 -0.111777

Na -0.867020 -2.618192 -2.671110  
Na 1.822117 3.323979 0.123063  
Cl 3.037373 2.067787 -1.808721  
Na 3.826350 -0.315380 -0.979513  
Cl -1.838976 -0.150414 -2.947018  
Cl -0.245813 -0.845274 2.386650  
Na 2.181932 0.273927 3.018414  
Cl 3.510381 -1.413237 1.532859  
O 5.819616 -1.383761 -0.761964  
Cl 1.291168 2.692797 2.616172  
Na 1.268648 -2.594445 0.742166  
Cl 1.370077 -1.412550 -1.736617  
H -6.225149 0.300744 0.843646  
Na 0.715216 1.114485 -2.698747  
H 6.719202 -1.475251 -1.091123  
H 5.797701 -1.757641 0.129557

Na10Cl8(C2H03)(H2O)+, Xb  
E = -5684.960155  
C -2.488760 3.764343 -1.035661  
O -3.544123 3.519057 -0.503763  
C -1.428329 2.669893 -1.253524  
O -0.245570 3.044473 -1.194717  
O -1.853771 1.488502 -1.380819  
Na 1.971579 2.995744 -1.610557  
Na -3.737938 1.286580 0.309515  
Na 0.012211 0.393359 -0.320406  
Na -2.510379 -0.409966 -2.424136  
Cl 3.686720 2.446483 0.296840  
Na 2.465984 1.977086 2.521876  
Cl -1.690314 1.062526 2.011667  
Cl -0.665103 -2.139699 -1.509427  
Na -0.582280 -1.035672 3.131316  
Cl 1.882145 0.487285 -2.444470  
Cl -4.331102 -1.078213 -0.690746  
Na -2.683393 -2.908541 0.230076  
Cl -0.983478 -3.399932 2.151928  
Na 1.729260 -2.110357 -2.792951  
Cl 3.309527 -2.825623 -0.883717  
Na 1.244140 -3.087579 0.718871  
Na 3.615302 -0.194818 -0.388003  
Cl 1.701750 -0.502381 1.745425  
H -2.206364 4.788393 -1.328173  
H -0.245976 2.336258 3.086672  
O 0.570376 2.700859 3.487705  
H 0.297758 3.425026 4.060266

Na10Cl8(C2H03)(H2O)+, Xc  
E = -5684.949191  
C 1.089451 -3.222901 -1.490572  
C -0.031977 -2.225959 -1.885463  
O 0.344854 -1.144812 -2.414006  
O 2.349178 -2.663076 -1.787180  
O -1.213945 -2.557436 -1.676516  
Na 3.791961 -1.848582 -0.133682  
Na -2.855756 -2.852249 -0.156014  
Na -1.942566 -0.350734 -2.414525  
Na 0.965866 0.912516 -1.576012  
Na 0.497083 -2.152257 1.935700  
Cl -2.084700 -2.518832 2.290096  
Cl -3.971412 -0.464160 -0.713326  
Cl 3.069507 -1.492361 2.312729  
Cl 3.639975 0.688652 -1.083691  
Na 4.007809 3.260546 -0.781909  
Cl 2.027824 3.530269 0.798725  
Cl -1.334696 2.264980 -2.041159  
Na 2.471184 1.010456 1.693854  
Na -2.684074 0.059052 1.805600  
Cl -3.037232 2.699792 1.635583

Na -3.778079 2.207186 -0.785234  
Na -0.638374 3.058228 0.654719  
Cl 0.001080 0.331734 0.905702  
O 1.005341 -3.495664 -0.105533  
H 1.202165 -4.426365 0.050400  
H 2.152205 -1.869143 -2.321570  
H 0.955866 -4.150486 -2.053410

Na10Cl8(C2H03)(H2O)+, Xd

E = -5684.949942  
C -1.388405 3.661145 0.722744  
C -1.211218 2.307180 1.456988  
O -0.059800 1.958981 1.779801  
O -0.169945 4.353142 0.712553  
O -2.274990 1.657176 1.613676  
Na 1.816021 3.015396 0.849098  
Na -3.419796 1.128447 -0.380446  
Na -2.605971 -0.336546 2.666665  
Na 0.830302 -0.176649 1.795528  
Na -0.321843 1.801942 -2.227002  
Cl -2.637496 0.737744 -2.833660  
Cl -3.591019 -1.431226 0.451798  
Cl 2.076059 2.784731 -1.770253  
Cl 3.350970 0.795115 1.526170  
Na 4.887588 -1.284702 1.227973  
Cl 3.966376 -2.143316 -1.001313  
Cl -0.628074 -2.007609 2.988394  
Na 2.992622 0.374323 -1.242860  
Na -2.045027 -1.686267 -1.886528  
Cl -0.903963 -4.039765 -1.259078  
Na -1.831452 -3.418382 1.098240  
Na 1.498219 -3.049267 -1.340579  
Cl 0.428984 -0.554728 -0.924172  
O -1.817652 3.300399 -0.592759  
H -2.214968 4.059163 -1.039668  
H -0.301134 5.273938 0.456267  
H -2.165573 4.252054 1.213824

Na11Cl9(C2H03)(H2O)+, XIa

E = -6307.639029  
C -4.966725 -1.094685 1.403892  
O -4.531894 -1.225763 2.522069  
C -4.050964 -0.806730 0.193682  
O -2.826082 -0.586599 0.451987  
O -4.592573 -0.837950 -0.917596  
Na -3.255485 0.002947 -2.549485  
Na -1.182751 -1.992427 -0.524462  
Na -2.188956 -1.022230 2.745233  
Na -1.558565 1.550068 0.272262  
Cl 0.579171 -3.454155 -2.039383  
Cl -2.964999 2.509191 -1.837477  
Na -1.483682 4.572518 -1.725037  
Cl 0.329083 3.957228 0.003263  
Na 1.504480 -4.035915 0.398965  
Cl 3.360443 -2.173964 0.560634  
Na 4.821376 0.032051 0.283399  
Cl 4.043405 0.678549 -2.126310  
Na 2.250202 2.167630 -0.892746  
Na 2.413535 -1.429744 -1.954150  
Cl -0.633137 1.148205 2.800109  
Na 1.106692 3.098461 2.426265  
Cl 3.156160 1.639713 1.659587  
Cl -0.302420 -2.745337 1.898210  
Na 1.404192 -0.528692 1.688302  
Cl 0.384029 0.165562 -0.951498  
H -6.039963 -1.189517 1.176564  
O -2.185912 -2.100240 -2.812169  
H -2.790024 -2.827048 -3.010795  
H -1.293117 -2.456777 -3.000841

Na11Cl9(C2H03)(H2O)+, XIb

E = -6307.633726  
C -4.963687 -1.180577 -0.770451  
C -3.427806 -1.046964 -0.849489  
O -2.935148 -1.214196 -1.992063  
O -5.553191 -1.434239 0.246979  
O -2.784772 -0.814424 0.201048  
Na -1.966917 0.540433 -3.062630  
Na -2.265832 -1.561504 2.347270  
Na -0.829620 -2.115250 -1.107772  
Na -1.611654 1.317308 0.302131  
Cl -3.101376 2.487642 -1.709432  
Na -1.941306 4.666254 -1.082818  
Cl -0.024177 3.856334 0.447520  
Cl -0.759746 0.662818 2.791655  
Na 0.735630 2.828035 2.796574  
Cl 2.892075 1.619165 1.923410  
Cl 0.268658 0.418377 -1.529019  
Cl -0.133001 -2.935150 1.415117  
Na 1.926682 -3.992777 0.053575  
Cl 3.535582 -1.945745 0.574058  
Na 4.818848 0.371554 0.524472  
Cl 4.082121 1.168838 -1.839168  
Na 2.058458 2.341651 -0.627682  
Na 2.681805 -1.094247 -2.012731  
Cl 1.198956 -3.275923 -2.342786  
Na 1.478330 -0.776397 1.954610  
H -5.487528 -1.063056 -1.733306  
O -4.408857 -2.043261 2.759786  
H -4.924612 -1.832210 1.958938  
H -5.016413 -2.424237 3.399977

Na11Cl9(C2H03)(H2O)+, XIc

E = -6307.626861  
C -4.943022 -0.858103 0.385489  
O -4.516273 -1.484757 1.614801  
C -3.634040 -0.337271 -0.243572  
O -2.963078 0.464013 0.439126  
O -3.309875 -0.802005 -1.374695  
Na -2.144751 0.831869 -2.533461  
Na -1.367824 -2.131227 -1.031326  
Na -2.467270 -0.685918 2.458393  
Na -1.276341 2.028856 0.373403  
Cl 0.391995 -3.707606 -2.120917  
Cl -2.347281 3.317929 -1.829376  
Na -0.605343 5.118103 -1.444928  
Cl 0.950467 3.901283 0.236098  
Na 0.979586 -4.272956 0.369436  
Cl 2.991096 -2.588474 0.629633  
Na 4.766417 -0.644961 0.344744  
Cl 4.074602 0.135283 -2.051315  
Na 2.460068 1.819006 -0.834155  
Na 2.252151 -1.802083 -1.981954  
Cl -0.488229 1.136800 2.835797  
Na 1.535250 2.824270 2.635071  
Cl 3.263903 1.107180 1.699562  
Cl -0.828762 -2.638158 1.565104  
Na 1.210289 -0.780993 1.693004  
Cl 0.218330 0.184452 -1.246895  
O -5.622330 -1.738646 -0.426106  
H -5.020925 -2.010679 -1.137361  
H -5.227931 -2.073618 1.896748  
H -5.604934 -0.023619 0.632834

Na11Cl9(C2H03)(H2O)+, XIId

E = -6307.608482  
C 0.000561 0.431565 -1.388107  
O 0.609281 0.150267 -0.324974

C 0.732405 0.301981 -2.746248  
O 2.104289 -0.021978 -2.580255  
O 0.130011 -0.676166 -3.529548  
Na 2.583682 4.469025 -0.816625  
Na 2.737214 -2.240501 -2.362929  
Na -2.071778 2.701847 -0.088902  
Na 1.578216 -1.995449 0.820089  
Na -1.435659 -0.708240 0.503567  
Na -3.208099 0.152137 -2.331189  
Na 1.329835 1.849473 1.084993  
Cl -4.462229 1.981150 -0.928197  
Na -4.558194 0.286704 1.041025  
Cl 3.641875 2.152919 -0.359789  
Na 4.360643 0.077457 1.178906  
Cl 4.049963 -2.141979 -0.118758  
Cl -2.192362 1.054917 2.294269  
Cl 0.216801 4.032392 0.064295  
Cl 2.117734 0.001331 2.801458  
Na -0.372752 -0.502951 3.664638  
Cl -0.706244 -2.682688 2.154167  
Na -1.806311 -3.832587 -0.041148  
Cl 0.300065 -3.113513 -1.497573  
Cl -3.621248 -1.838138 -0.482585  
O -1.211514 0.779334 -1.428448  
H 0.037552 -1.495485 -3.000817  
H 2.519150 0.582854 -1.937387  
H 0.630158 1.244993 -3.290423

Na<sub>3</sub>(C<sub>2</sub>H<sub>3</sub>)<sub>2</sub><sup>+</sup>, Ba

E = -1092.135333  
C 2.201448 1.421648 -0.552663  
C 1.320797 0.952540 0.615597  
O 0.388460 1.718093 0.921505  
O 2.536904 0.638539 -1.414157  
O 1.564546 -0.199154 1.063766  
Na -0.087285 -1.227440 2.161590  
O -1.748317 -0.599860 0.787143  
C -1.357409 -1.027516 -0.328123  
C -2.022734 -0.403417 -1.565052  
O -2.322834 0.768501 -1.565941  
O -0.420935 -1.825992 -0.547341  
Na -1.818186 1.743436 0.544952  
Na 1.802869 -1.526629 -0.879653  
H 2.438677 2.494516 -0.617618  
H -2.145260 -1.038108 -2.456510

Na<sub>3</sub>(C<sub>2</sub>H<sub>3</sub>)<sub>2</sub><sup>+</sup>, Bb

E = -1092.129361  
C -3.838350 1.724571 0.000000  
C -2.452884 1.044956 0.000000  
O -1.470646 1.795813 0.000000  
O -4.866700 1.084928 0.000000  
O -2.440438 -0.225184 0.000000  
Na -4.425879 -1.175159 0.000000  
Na 0.000000 -0.000187 -0.000000  
H -3.837948 2.824788 0.000000  
C 2.452987 -1.045092 -0.000000  
O 2.440319 0.225065 -0.000000  
O 1.470855 -1.796083 -0.000000  
C 3.838541 -1.724467 -0.000000  
O 4.866792 -1.084665 -0.000000  
H 3.838314 -2.824684 -0.000000  
Na 4.425553 1.175446 -0.000000

Na<sub>3</sub>(C<sub>2</sub>H<sub>3</sub>)<sub>2</sub>(H<sub>2</sub>O)<sup>+</sup>, Ca

E = -1168.601028  
C 2.061496 -2.189920 -0.442270  
C 0.885302 -1.532676 0.313994  
O -0.182299 -2.160917 0.300448

O 3.037069 -1.557568 -0.772830  
O 1.125204 -0.404139 0.832835  
Na 2.940623 0.664209 -0.077906  
Na -2.375571 -1.996840 -0.127807  
O -2.396565 0.206242 0.748383  
C -2.338157 0.568600 -0.458718  
C -1.659634 1.906725 -0.768450  
O -0.723350 2.296872 -0.093673  
O -2.636794 -0.096222 -1.461977  
Na -0.540399 0.760579 1.821807  
H -1.975597 2.433844 -1.680307  
H 1.941868 -3.253711 -0.698472  
O 2.086924 2.735071 -0.345688  
H 2.466422 3.595886 -0.553184  
H 1.120579 2.845477 -0.372388

Na<sub>3</sub>(C<sub>2</sub>H<sub>3</sub>)<sub>2</sub>(H<sub>2</sub>O)<sup>+</sup>, Cb

E = -1168.591767  
C -2.684736 0.270328 -0.029481  
O -2.396119 -0.358557 1.255873  
Na -0.782055 -1.962853 1.110042  
O 1.423917 -1.540781 0.774765  
C 1.975174 -0.465099 0.447336  
C 2.247343 0.537164 1.580238  
O 2.056547 1.718210 1.404299  
C -1.351843 0.139552 -0.798733  
O -0.974550 -1.041442 -1.039562  
Na 1.021896 -1.603881 -1.841970  
O 2.238549 -0.075597 -0.716609  
O -0.731062 1.192447 -1.047276  
Na 1.308411 2.066306 -0.829930  
H -3.481537 -0.298113 -0.513113  
H 2.551547 0.133942 2.558951  
O -3.093636 1.567803 0.132135  
H -2.328545 2.139343 -0.042948  
H -3.077029 -0.058806 1.872395

Na<sub>3</sub>(C<sub>2</sub>H<sub>3</sub>)<sub>2</sub>(H<sub>2</sub>O)<sub>2</sub><sup>+</sup>, Da

E = -1245.071586  
C 2.096500 -2.618702 0.000000  
C 1.189343 -1.366598 0.000000  
O -0.030379 -1.581035 0.000000  
O 3.301726 -2.540001 0.000000  
O 1.775136 -0.243427 0.000000  
Na 4.055838 -0.352479 0.000000  
Na -2.315136 -1.506035 0.000000  
O -2.125318 0.702993 0.000000  
C -3.015836 1.606795 0.000000  
C -2.471971 3.052187 0.000000  
O -1.283816 3.287803 0.000000  
O -4.241036 1.474643 0.000000  
Na -0.000000 1.274188 0.000000  
H -3.224708 3.855550 0.000000  
H 1.575952 -3.588766 0.000000  
O -4.519551 -1.250033 0.000000  
H -5.401604 -1.631107 0.000000  
H -4.617474 -0.265618 0.000000  
O 6.161254 0.482867 0.000000  
H 6.464302 1.398647 0.000000  
H 6.963473 -0.053692 0.000000

Na<sub>3</sub>(C<sub>2</sub>H<sub>3</sub>)<sub>2</sub>(H<sub>2</sub>O)<sub>2</sub><sup>+</sup>, Db

E = -1245.066833  
C -2.515871 -1.983234 -0.425047  
O -3.418978 -1.341422 0.059306  
Na -2.837924 0.892159 0.371138  
O -1.816682 2.522555 1.534855  
C -1.141412 -1.349859 -0.739255  
O -1.105505 -0.087313 -0.753644



Na 0.828983 1.094018 -1.128858  
O 2.364465 -0.200707 -0.124906  
C 2.134973 -0.322693 1.107918  
O 2.146179 -1.366558 1.780418  
Na 1.886384 -2.511998 -0.234796  
O -0.211523 -2.152391 -0.906175  
C 1.614234 0.902476 1.864557  
O 0.879237 1.705068 1.319416  
H 1.840678 0.961001 2.939687  
H -2.612113 -3.060948 -0.628448  
H -2.100231 3.276293 2.062725  
H -0.852111 2.448577 1.647661  
O 1.345032 2.538448 -2.834182  
H 0.858972 2.767739 -3.634410  
H 2.203591 2.969779 -2.919293

Na<sub>3</sub>(C<sub>2</sub>H<sub>03</sub>)<sub>2</sub>(H<sub>2</sub>O)<sub>2+</sub>, Dc

E = -1245.054738  
C -2.804060 0.844780 -0.724853  
O -2.217903 1.687443 -0.068115  
C -2.600492 -0.644751 -0.435940  
O -2.399669 -0.988670 0.761227  
Na -1.157450 0.510221 1.817783  
O -2.508612 -1.351006 -1.450912  
Na -1.146793 -2.758417 -0.177536  
O 0.818790 -1.768970 0.226231  
C 1.409438 -0.704361 0.474222  
O 0.900637 0.362968 0.931987  
Na 1.679184 2.183152 -0.209634  
O -0.108268 3.542700 -0.426821  
C 2.924970 -0.652881 0.170408  
O 3.397264 -1.802307 -0.411559  
O 3.101393 0.488438 -0.710941  
H -3.400069 1.111863 -1.609438  
H 3.491363 -0.460750 1.086675  
H -0.223953 4.477495 -0.628414  
H -0.997705 3.148698 -0.414034  
H 2.629982 -2.325279 -0.693960  
H 3.927831 0.341986 -1.189384

Na<sub>3</sub>(C<sub>2</sub>H<sub>03</sub>)<sub>2</sub>(H<sub>2</sub>O)<sub>2+</sub>, Dd

E = -1245.049993  
C 2.376275 -0.804611 -0.531494  
C 1.854625 0.654647 -0.628614  
O 1.319791 0.942057 -1.718531  
O 2.205830 -1.307845 0.787891  
O 1.963004 1.410148 0.370471  
Na 1.200798 0.398291 2.194151  
O -0.699657 -0.318100 1.260996  
C -1.568022 0.361879 0.638789  
C -2.850096 -0.399904 0.235557  
O -2.369991 -1.493722 -0.595911  
O -1.470207 1.548642 0.278729  
O -3.749738 0.382322 -0.442271  
Na 0.211668 2.676633 -0.680667  
Na -0.255156 -2.168173 -0.052430  
H 3.435408 -0.842571 -0.803137  
H -3.340507 -0.832498 1.111405  
H -3.288317 1.194641 -0.707544  
H -3.122785 -1.794540 -1.121333  
O 1.610960 -1.614258 -1.402194  
H 2.894794 -1.958992 0.967307  
H 1.334363 -1.006334 -2.117167
