# Supplementary material for: Spectroscopy of cluster aerosol models: IR and UV spectra of hydrated glyoxylate with and without sea salt
Source: Environ Sci Atmos. 2023 Aug 30;3(10):1396–406. doi: 10.1039/d3ea00039g (PMC10569154; doi:10.1039/d3ea00039g)
Supplement: EA-003-D3EA00039G-s002 [file EA-003-D3EA00039G-s002.xlsx]

## Sheet: Figure_2
n = 4	wavenumber [cm-1]	σ 10-20 cm2	Noise		n = 5	wavenumber [cm-1]	σ 10-20 cm2	Noise		n = 6	wavenumber [cm-1]	σ 10-20 cm2	Noise		n = 7	wavenumber [cm-1]	σ 10-20 cm2	Noise		n = 8	wavenumber [cm-1]	σ 10-20 cm2	Noise		n = 9	wavenumber [cm-1]	σ 10-20 cm2	Noise		n = 10	wavenumber [cm-1]	σ 10-20 cm2	Noise		n = 11	wavenumber [cm-1]	σ 10-20 cm2	Noise
	3731.34	0.29672	0.24536			3846.15	0.00466	0.09785			3846.15	0.0233	0.01864			3846.15	0.00932	0.01398			3846.15	0.01398	0.05361			3846.15	0.06989	0.0233			3846.15	0.16308	0.05125			3846.15	0.00466	0.25627
	3727.17	0.00557	0.2282			3824.09	0.00468	0.09368			3824.09	0.01874	0.01874			3824.09	0.00937	0.01405			3824.09	0.01405	0.05389			3824.09	0.0281	0.02342			3824.09	0.16394	0.04684			3824.09	0.00468	0.2623
	3723.01	0.00559	0.24016			3802.28	0.00485	0.07278			3802.28	0.02911	0.01941			3802.28	0.03882	0.01456			3802.28	0.02426	0.05582			3802.28	0.07763	0.01941			3802.28	0.13586	0.04367			3802.28	0.00485	0.40757
	3718.86	0.00555	0.24416			3780.72	0.00487	0.09254			3780.72	0.02435	0.01948			3780.72	0.02922	0.01461			3780.72	0.01948	0.05603			3780.72	0.02435	0.02435			3780.72	0.14124	0.0487			3780.72	0.00487	0.36041
	3714.71	0.00553	0.25444			3759.4	0.00522	0.10967			3759.4	0.02611	0.02089			3759.4	0.00522	0.01567			3759.4	0.02089	0.06008			3759.4	0.07311	0.02611			3759.4	0.15667	0.05222			3759.4	0.00522	0.60056
	3710.57	0.00566	0.26038			3738.32	0.0056	0.11208			3738.32	0.03362	0.02242			3738.32	0.01681	0.01681			3738.32	0.03923	0.06447			3738.32	0.07285	0.02802			3738.32	0.19053	0.06725			3738.32	0.0056	0.27459
	3706.45	0.23172	0.20965			3717.47	0.00553	0.11061			3717.47	0.04977	0.02212			3717.47	0.04977	0.01659			3717.47	0.06083	0.06363			3717.47	0.06636	0.03318			3717.47	0.2931	0.04977			3717.47	0.00553	0.48666
	3702.33	0.00544	0.21229			3696.86	0.20566	0.08659			3696.86	0.1353	0.02165			3696.86	0.12448	0.01624			3696.86	0.12989	0.08302			3696.86	0.14071	0.02706			3696.86	0.28684	0.04871			3696.86	0.52497	0.37884
	3698.22	0.2986	0.19002			3676.47	0.43449	0.11007			3676.47	0.35918	0.02317			3676.47	0.30704	0.01738			3676.47	0.33601	0.06665			3676.47	0.18539	0.02897			3676.47	0.49822	0.05214			3676.47	0.97327	0.44608
	3694.13	0.00545	0.22877			3656.31	1.98093	0.1132			3656.31	2.07715	0.02264			3656.31	1.58475	0.01698			3656.31	1.9017	0.06512			3656.31	0.97349	0.02264			3656.31	1.24516	0.0566			3656.31	5.13345	0.4924
	3690.04	0.0056	0.21288			3636.36	3.49081	0.12732			3636.36	3.3847	0.02122			3636.36	3.15127	0.01592			3636.36	1.92047	0.06104			3636.36	3.01864	0.02653			3636.36	2.29714	0.04775			3636.36	3.29982	0.35014
	3685.96	0.26489	0.24235			3616.64	0.33346	0.10386			3616.64	0.22959	0.02187			3616.64	0.20773	0.0164			3616.64	0.16946	0.08386			3616.64	0.12026	0.02733			3616.64	0.28426	0.06013			3616.64	0.63411	0.37172
	3681.89	0.37072	0.21579			3597.12	0.21257	0.11925			3597.12	0.13999	0.02074			3597.12	0.09851	0.01555			3597.12	0.12443	0.07953			3597.12	0.09332	0.02592			3597.12	0.25923	0.05185			3597.12	0.56513	0.30071
	3677.82	0.38935	0.18895			3577.82	0.32058	0.07756			3577.82	0.14478	0.02068			3577.82	0.10859	0.01551			3577.82	0.14995	0.07932			3577.82	0.07756	0.03102			3577.82	0.25336	0.05171			3577.82	0.50673	0.31024
	3673.77	0.54168	0.22024			3558.72	0.59169	0.071			3558.72	0.19881	0.01893			3558.72	0.16094	0.0142			3558.72	0.23668	0.05446			3558.72	0.10887	0.02367			3558.72	0.29348	0.04734			3558.72	0.87098	0.35975
	3669.72	0.53361	0.22869			3539.82	1.10946	0.10651			3539.82	0.27958	0.01775			3539.82	0.1642	0.01331			3539.82	0.34171	0.05106			3539.82	0.11538	0.02219			3539.82	0.38166	0.03994			3539.82	1.16715	0.4571
	3665.69	0.92329	0.23937			3521.13	0.78034	0.11583			3521.13	0.26214	0.02439			3521.13	0.18289	0.01829			3521.13	0.35969	0.09352			3521.13	0.1707	0.03048			3521.13	0.32921	0.06096			3521.13	1.48752	0.38407
	3661.66	1.1466	0.25293			3502.63	0.36399	0.0936			3502.63	0.2912	0.0208			3502.63	0.2288	0.0156			3502.63	0.36399	0.07977			3502.63	0.2236	0.026			3502.63	0.3588	0.052			3502.63	1.33638	0.338
	3657.64	2.03268	0.23649			3484.32	0.21988	0.07953			3484.32	0.29941	0.01871			3484.32	0.24327	0.01403			3484.32	0.34619	0.05383			3484.32	0.23859	0.02339			3484.32	0.39766	0.03743			3484.32	1.29121	0.3228
	3653.64	2.28236	0.22033			3466.2	0.17685	0.08604			3466.2	0.30591	0.01912			3466.2	0.26289	0.01434			3466.2	0.38717	0.07332			3466.2	0.23421	0.0239			3466.2	0.35371	0.04302			3466.2	1.4244	0.32025
	3649.64	2.73002	0.26163			3448.28	0.16358	0.08923			3448.28	0.31725	0.01983			3448.28	0.25281	0.01487			3448.28	0.40648	0.07604			3448.28	0.30734	0.02479			3448.28	0.34204	0.04461			3448.28	1.49704	0.52545
	3645.64	3.91121	0.24341			3430.53	0.13509	0.11347			3430.53	0.35123	0.02161			3430.53	0.24856	0.01621			3430.53	0.40526	0.08289			3430.53	0.38905	0.02702			3430.53	0.44849	0.04323			3430.53	1.30225	0.42688
	3641.66	4.69965	0.19582			3412.97	0.1565	0.12855			3412.97	0.35212	0.02236			3412.97	0.28505	0.01677			3412.97	0.39125	0.06431			3412.97	0.38007	0.02795			3412.97	0.55333	0.05589			3412.97	1.13461	0.47508
	3637.69	4.22172	0.20103			3395.59	0.14156	0.11797			3395.59	0.3598	0.02359			3395.59	0.27133	0.0177			3395.59	0.31851	0.06786			3395.59	0.3775	0.02949			3395.59	0.51316	0.06488			3395.59	1.14429	0.57804
	3633.72	2.92998	0.20355			3378.38	0.14646	0.11595			3378.38	0.33563	0.02441			3378.38	0.28681	0.01831			3378.38	0.31122	0.09361			3378.38	0.36614	0.03051			3378.38	0.61634	0.05492			3378.38	1.03131	0.90316
	3629.76	1.52074	0.21489			3361.34	0.00627	0.15043			3361.34	0.34474	0.02507			3361.34	0.30086	0.0188			3361.34	0.30086	0.07211			3361.34	0.34474	0.03134			3361.34	0.60799	0.05641			3361.34	0.82736	0.54531
	3625.82	0.75949	0.20363			3344.48	0.00622	0.14304			3344.48	0.36071	0.02488			3344.48	0.34206	0.01866			3344.48	0.27364	0.07155			3344.48	0.35449	0.0311			3344.48	0.59704	0.06219			3344.48	0.63436	0.41669
	3621.88	0.82468	0.22638			3327.79	0.12199	0.12199			3327.79	0.28668	0.0244			3327.79	0.39647	0.0183			3327.79	0.26228	0.07018			3327.79	0.29278	0.0305			3327.79	0.51846	0.0549			3327.79	0.59166	0.53676
	3617.95	0.3846	0.20878			3311.26	0.00574	0.13776			3311.26	0.28126	0.02296			3311.26	0.37885	0.01722			3311.26	0.26404	0.06604			3311.26	0.24108	0.0287			3311.26	0.65437	0.05166			3311.26	0.73473	0.63715
	3614.02	0.51525	0.18441			3294.89	0.00528	0.11087			3294.89	0.22702	0.02112			3294.89	0.32733	0.01584			3294.89	0.2587	0.08099			3294.89	0.2587	0.0264			3294.89	0.40652	0.0528			3294.89	0.73914	0.45404
	3610.11	0.57227	0.21595			3278.69	0.00495	0.10895			3278.69	0.21295	0.02476			3278.69	0.31199	0.01486			3278.69	0.22285	0.05698			3278.69	0.19314	0.02476			3278.69	0.47046	0.04457			3278.69	0.6735	0.5695
	3606.2	0.22289	0.20166			3262.64	0.00462	0.11085			3262.64	0.17552	0.01848			3262.64	0.2448	0.01386			3262.64	0.17552	0.05314			3262.64	0.19861	0.02309			3262.64	0.36951	0.04157			3262.64	0.00462	0.51732
	3602.3	0.00519	0.19712			3246.75	0.00442	0.09713			3246.75	0.1766	0.02208			3246.75	0.23841	0.01325			3246.75	0.15011	0.0508			3246.75	0.18985	0.02208			3246.75	0.35321	0.03974			3246.75	0.47683	0.40177
	3598.42	0.22789	0.1761			3231.02	0.00422	0.09291			3231.02	0.15626	0.01689			3231.02	0.18583	0.01689			3231.02	0.11403	0.04859			3231.02	0.14782	0.02112			3231.02	0.31675	0.03801			3231.02	0.51947	0.38432
	3594.54	0.42649	0.19244			3215.43	0.00419	0.08386			3215.43	0.13418	0.01677			3215.43	0.17611	0.01258			3215.43	0.10064	0.04824			3215.43	0.1216	0.02516			3215.43	0.23901	0.04193			3215.43	0.00419	0.70446
	3590.66	0.24537	0.18272			3200	0.00431	0.08196			3200	0.10353	0.01726			3200	0.14667	0.01294			3200	0.08196	0.04963			3200	0.12079	0.02588			3200	0.27177	0.03882			3200	0.00431	0.67295
	3586.8	0.20138	0.16958			3184.71	0.00435	0.08268			3184.71	0.09139	0.02176			3184.71	0.14361	0.01306			3184.71	0.06963	0.05007			3184.71	0.09139	0.02176			3184.71	0.23935	0.03917			3184.71	0.00435	0.34379
	3582.95	0.0052	0.21337			3169.57	0.00429	0.08575			3169.57	0.06431	0.02144			3169.57	0.10718	0.01286			3169.57	0.0686	0.04933			3169.57	0.07717	0.02144			3169.57	0.22294	0.03859			3169.57	0.00429	0.36014
	3579.1	0.31068	0.18641			3154.57	0.00438	0.08316			3154.57	0.0569	0.01751			3154.57	0.10942	0.01313			3154.57	0.05252	0.06714			3154.57	0.09629	0.02188			3154.57	0.28887	0.03939			3154.57	0.00438	0.50771
	3575.26	0.00515	0.19573			3139.72	0.0044	0.1056			3139.72	0.0616	0.022			3139.72	0.0748	0.0132			3139.72	0.0484	0.0675			3139.72	0.0704	0.022			3139.72	0.27281	0.0396			3139.72	0.0044	0.50602
	3571.43	0.00509	0.21897			3125	0.00436	0.09582			3125	0.06097	0.02178			3125	0.08275	0.01307			3125	0.05226	0.05011			3125	0.06533	0.02178			3125	0.18728	0.04355			3125	0.00436	0.39633
	3567.61	0.3505	0.19303			3110.42	0.00424	0.08477			3110.42	0.05934	0.02119			3110.42	0.06782	0.01272			3110.42	0.0551	0.04876			3110.42	0.11868	0.02119			3110.42	0.27126	0.03815			3110.42	0.00424	0.4959
	3563.79	0.29431	0.18149			3095.97	0.00414	0.10755			3095.97	0.0455	0.02068			3095.97	0.07032	0.01241			3095.97	0.04137	0.04759			3095.97	0.05378	0.02068			3095.97	0.17787	0.03309			3095.97	0.00414	0.6784
	3559.99	0.45283	0.14777			3081.66	0.00419	0.08797			3081.66	0.04189	0.02094			3081.66	0.04608	0.01257			3081.66	0.03351	0.04819			3081.66	0.02932	0.02094			3081.66	0.21782	0.03351			3081.66	0.00419	0.40633
	3556.19	0.55673	0.17778			3067.49	0.00402	0.08042			3053.43	0.02818	0.02013			3053.43	0.02013	0.01208			3053.43	0.03623	0.06175			3053.43	0.04428	0.02013			3053.43	0.2053	0.03623			3053.43	0.00403	0.40256
	3552.4	0.46072	0.17507			3053.43	0.00403	0.08454			3025.72	0.01994	0.01994			3025.72	0.03987	0.01196			3025.72	0.03588	0.04587			3025.72	0.06379	0.02392			3025.72	0.1236	0.03588			3025.72	0.00399	0.4306
	3548.62	0.45166	0.17163			3039.51	0.00404	0.08884			3012.05	0.03245	0.01622			3012.05	0.04056	0.01217			3012.05	0.0365	0.04667			3012.05	0.02434	0.02028			3012.05	0.1663	0.04056			3012.05	0.00406	0.53945
	3544.84	0.44299	0.17276			3025.72	0.00399	0.09569			2985.07	0.04004	0.02002			2985.07	0.03603	0.01201			2985.07	0.04404	0.04607			2985.07	0.05205	0.02402			2985.07	0.16816	0.03603			2985.07	0.004	0.39238
	3541.08	0.43044	0.18638			3012.05	0.14196	0.08518			2971.77	0.03251	0.02438			2971.77	0.05283	0.01219			2971.77	0.0447	0.04676			2971.77	0.03657	0.02032			2971.77	0.13411	0.03657			2971.77	0.00406	0.56081
	3537.32	0.44558	0.14704			2998.5	0.08912	0.07696			2958.58	0.0366	0.02033			2958.58	0.0366	0.0122			2958.58	0.0366	0.04679			2958.58	0.04473	0.02033			2958.58	0.183	0.04067			2958.58	0.00407	0.3782
	3533.57	0.34583	0.17516			2985.07	0.1081	0.08809			2919.71	0.0706	0.02206			2919.71	0.05295	0.01324			2919.71	0.06619	0.05077			2919.71	0.11032	0.02206			2919.71	0.22064	0.03972			2919.71	0.00441	0.48982
	3529.83	0.45906	0.16693			2971.77	0.13817	0.09753			2906.98	0.12469	0.01781			2906.98	0.09797	0.01336			2906.98	0.10242	0.05123			2906.98	0.12023	0.02227			2906.98	0.25383	0.04453			2906.98	0.00445	0.57445
	3526.09	0.19756	0.1925			2958.58	0.183	0.0976			2894.36	0.20838	0.02217			2894.36	0.19508	0.0133			2894.36	0.17735	0.05101			2894.36	0.13301	0.02217			2894.36	0.21282	0.04877			2894.36	0.00443	0.7493
	3522.37	0.27537	0.2285			2945.51	0.19884	0.09942			2881.84	0.1689	0.02222			2881.84	0.17779	0.01333			2881.84	0.24001	0.05114			2881.84	0.11112	0.02667			2881.84	0.2889	0.04445			2881.84	0.76448	0.55114
	3518.65	0.28959	0.22181			2932.55	0.17643	0.09037			2857.14	0.11582	0.02316			2857.14	0.10192	0.0139			2857.14	0.16214	0.0533			2857.14	0.12508	0.02316			2857.14	0.26869	0.04169			2857.14	0.81997	0.4262
	3514.94	0.0059	0.24796			2919.71	0.30007	0.08384			2844.95	0.08971	0.02361			2844.95	0.08971	0.01416			2844.95	0.1322	0.05432			2844.95	0.08499	0.02833			2844.95	0.13692	0.04721			2844.95	0.67044	0.42965
	3511.24	0.00567	0.24956			2906.98	0.26719	0.08906			2832.86	0.04759	0.02379			2832.86	0.0571	0.01428			2832.86	0.09042	0.05475			2832.86	0.09042	0.02379			2832.86	0.26173	0.04283			2832.86	0.46636	0.45208
	3507.54	0.00545	0.21251			2894.36	0.15961	0.08867			2820.87	0.02386	0.02386			2820.87	0.02386	0.01432			2820.87	0.04296	0.07322			2820.87	0.06205	0.02386			2820.87	0.15751	0.0525			2820.87	0.00477	0.62525
	3503.85	0.00526	0.19994			2881.84	0.00444	0.10667			2808.99	0.01888	0.0236			2808.99	0.01888	0.01416			2808.99	0.03304	0.05431			2808.99	0.01416	0.02832			2808.99	0.20769	0.04248			2808.99	0.00472	0.75523
	3500.18	0.00506	0.19237			2869.44	0.00463	0.0833			2797.2	0.0096	0.02401			2797.2	0.02401	0.01441			2797.2	0.02881	0.05525			2797.2	0.02401	0.02401			2797.2	0.16809	0.04322			2797.2	0.0048	0.60992
	3496.5	0.0049	0.20578			2857.14	0.00463	0.11118			2773.93	0.01949	0.02436			2773.93	0.01462	0.01462			2773.93	0.02436	0.05606			2773.93	0.04386	0.02924			2773.93	0.21928	0.05847			2773.93	0.00487	0.64321
	3492.84	0.00475	0.19945			2844.95	0.00472	0.11332			2751.03	0.01453	0.02422			2751.03	0.01453	0.01453			2751.03	0.02422	0.05573			2751.03	0.03391	0.02906			2751.03	0.15985	0.04359			2751.03	0.00484	0.49891
	3489.18	0.00467	0.1961			2832.86	0.00476	0.11897			2739.73	0.00968	0.0242			2739.73	0.00968	0.01452			2739.73	0.0242	0.05569			2739.73	0.01936	0.0242			2739.73	0.19847	0.04841			2739.73	0.00484	0.4647
	3485.53	0.00466	0.19591			2820.87	0.00477	0.08591			2706.36	0.00975	0.02438			2706.36	0.00488	0.01463			2706.36	0.02438	0.05609			2706.36	0.00488	0.02925			2706.36	0.234	0.04875			2706.36	0.00488	0.50701
	3481.89	0.00468	0.1825			2808.99	0.00472	0.11328			2673.8	0.00945	0.02362			2673.8	0.00472	0.01417			2673.8	0.0189	0.05435			2673.8	0.05197	0.02835			2673.8	0.18897	0.04724			2673.8	0.00472	0.64249
	3478.26	0.00467	0.20086			2797.2	0.0048	0.10085			2663.12	0.00959	0.02397			2663.12	0.00959	0.01438			2663.12	0.01918	0.05516			2663.12	0.00479	0.02877			2663.12	0.13904	0.05274			2663.12	0.00479	0.7815
	3474.64	0.00468	0.1919			2785.51	0.00473	0.12306			2642.01	0.00471	0.02354			2642.01	0.00471	0.01412			2642.01	0.01412	0.07221			2642.01	0.02354	0.02354			2642.01	0.14592	0.05178			2642.01	0.00471	0.69196
	3471.02	0.00472	0.18419			2773.93	0.00487	0.09746			2621.23	0.00479	0.02873			2621.23	0.01436	0.01436			2621.23	0.02394	0.05509			2621.23	0.01915	0.02873			2621.23	0.15322	0.04788			2621.23	0.00479	0.47403
	3467.41	0.00475	0.19495			2762.43	0.00485	0.11642			2610.97	0.00469	0.02815			2610.97	0.00469	0.01407			2610.97	0.02346	0.05397			2610.97	0.02815	0.02346			2610.97	0.16889	0.04691			2610.97	0.00469	0.50666
	3463.8	0.0048	0.20141			2751.03	0.00484	0.13563			2600.78	0.00479	0.02873			2600.78	0.02394	0.01436			2600.78	0.01436	0.05508			2600.78	0.01915	0.02873			2600.78	0.1149	0.04788			2600.78	0.00479	0.59367
	3460.21	0.00481	0.19733			2739.73	0.00484	0.13554			2590.67	0.0137	0.02283			2590.67	0.00913	0.0137			2590.67	0.0137	0.05252			2590.67	0.00457	0.02739			2590.67	0.19174	0.04109			2590.67	0.00457	0.47023
	3456.62	0.21271	0.1692			2728.51	0.00484	0.11605			2570.69	0.00928	0.02321			2570.69	0.00464	0.01393			2570.69	0.02321	0.05341			2570.69	0.01393	0.02321			2570.69	0.12998	0.05106			2570.69	0.00464	0.63134
	3444.71	0.00503	0.19606			2717.39	0.0048	0.11045			2560.82	0.00461	0.02306			2560.82	0.00923	0.01384			2560.82	0.01845	0.05307			2560.82	0.0369	0.02768			2560.82	0.18912	0.04152			2560.82	0.00461	1.02404
	3432.89	0.2035	0.16601			2706.36	0.00488	0.117			2551.02	0.00463	0.02778			2551.02	0.00463	0.01389			2551.02	0.01389	0.05327			2551.02	0.0463	0.02315			2551.02	0.22226	0.04167			2551.02	0.00463	0.61584
	3421.14	0.00555	0.2053			2695.42	0.00471	0.08956			2541.3	0.0091	0.02275			2541.3	0.02275	0.01365			2541.3	0.0182	0.05234			2541.3	0.05004	0.02275			2541.3	0.16377	0.04549			2541.3	0.00455	0.66417
	3409.48	0.23587	0.21341			2684.56	0.00473	0.1229			2522.07	0.00921	0.02762			2522.07	0.01841	0.01381			2522.07	0.01381	0.05296			2522.07	0.02762	0.02301			2522.07	0.18412	0.04143			2522.07	0.0046	0.81933
	3397.89	0.00588	0.23516			2673.8	0.00472	0.09921			2503.13	0.00463	0.02315			2503.13	0.01389	0.01389			2503.13	0.01389	0.05326			2503.13	0.05555	0.02315			2503.13	0.21757	0.04166			2503.13	0.00463	0.77305
	3386.39	0.00599	0.24578			2663.12	0.00479	0.11507			2493.77	0.00463	0.02314			2493.77	0.00463	0.01389			2493.77	0.01851	0.05325			2493.77	0.00463	0.02777			2493.77	0.162	0.04629			2493.77	0.00463	0.78222
	3374.96	0.00617	0.28366			2652.52	0.00465	0.09292			2475.25	0.0094	0.02351			2475.25	0.0047	0.01411			2475.25	0.01881	0.0541			2475.25	0.03762	0.02821			2475.25	0.20218	0.04232			2475.25	0.0047	0.51721
	3363.61	0.00628	0.28867			2642.01	0.00471	0.11768			2466.09	0.00473	0.02838								2466.09	0.01419	0.05442			2466.09	0.00473	0.02838			2466.09	0.19866	0.04257			2466.09	0.00473	0.51558
	3352.33	0.00623	0.26179			2631.58	0.00478	0.10995			2457	0.00491	0.02946								2457	0.01473	0.05649			2457	0.00491	0.03437			2457	0.10311	0.04419			2457	0.00491	0.87394
	3341.13	0.00625	0.24359			2621.23	0.00479	0.11013			2447.98	0.00994	0.02486								2447.98	0.01492	0.05721			2447.98	0.00497	0.02983								2447.98	0.00497	0.63643
	3330	0.00617	0.25295			2610.97	0.00469	0.13136			2439.02	0.01541	0.02568								2439.02	0.01541	0.05909			2439.02	0.04109	0.03082								2439.02	0.00514	0.75497
	3318.95	0.0059	0.24197			2600.78	0.00479	0.09097			2430.13	0.00525	0.03152								2430.13	0.01576	0.06045			2430.13	0.00525	0.03152								2430.13	0.00525	0.89317
	3307.97	0.23593	0.23593			2587.32	0.00458	0.087			2403.85	0.00591	0.03548								2403.85	0.02365	0.06803			2403.85	0.09461	0.02956								2403.85	0.00591	0.94606
	3297.07	0.00532	0.23933			2574	0.00466	0.11195			2395.21	0.01149	0.03446								2395.21	0.02297	0.06608			2395.21	0.02872	0.02872								2395.21	0.00574	0.79258
	3286.23	0.00513	0.21546			2560.82	0.00461	0.10609			2378.12	0.00705	0.0282								2378.12	0.0282	0.08111													2378.12	0.00705	1.32541
	3275.47	0.00486	0.2188			2547.77	0.00458	0.10994			2361.28	0.01654	0.04134								2361.28	0.02481	0.09513													2361.28	0.00827	1.52138
	3264.77	0.00464	0.1997			2534.85	0.00452	0.10845			2352.94	0.01477	0.03692								2352.94	0.02953	0.08495													2352.94	0.00738	1.24047
	3254.15	0.00453	0.21303			2522.07	0.0046	0.12888			2320.19	0.00806	0.04028								2320.19	0.02417	0.09268													2320.19	0.00806	1.21638
	3243.59	0.00437	0.20098			2509.41	0.00463	0.11564			2312.14	0.01366	0.03415								2312.14	0.02049	0.07857													2312.14	0.00683	1.22247
	3233.11	0.00425	0.19145			2496.88	0.00465	0.12087			2304.15	0.01262	0.03154								2304.15	0.01262	0.07257													2304.15	0.00631	1.14804
	3222.69	0.00417	0.18364			2484.47	0.00464	0.08815			2296.21	0.00626	0.03758								2296.21	0.01879	0.07206													2296.21	0.00626	1.3716
	3212.34	0.00422	0.16444			2472.19	0.00473	0.09925			2265.01	0.00637	0.03186								2265.01	0.01912	0.07332													2265.01	0.00637	0.95592
	3202.05	0.0043	0.18476			2460.03	0.00486	0.12144																												Inf	--	--
	3191.83	0.00436	0.19615			2447.98	0.00497	0.13425																												Inf	--	--
	3181.67	0.17369	0.17369			2436.05	0.00523	0.1204																												Inf	--	--
	3171.58	0.17564	0.15422			2424.24	0.00528	0.14246																												Inf	--	--
	3161.55	0.00433	0.16878			2412.55	0.0056	0.14566																												Inf	--	--
	3151.59	0.18847	0.16217			2400.96	0.00586	0.15828																												Inf	--	--
	3141.69	0.00441	0.17197			2389.49	0.00594	0.14839																												Inf	--	--
	3131.85	0.16962	0.15657			2378.12	0.00705	0.17625																												Inf	--	--
	3122.07	0.00431	0.18521			2366.86	0.00878	0.24585																												Inf	--	--
	3112.36	0.00426	0.17049			2355.71	0.00745	0.17138																												Inf	--	--
	3102.7	0.0042	0.17619			2344.67	0.00849	0.25473																												Inf	--	--
	3093.1	0.00416	0.17052			2333.72	0.00823	0.33725																												Inf	--	--
	3083.57	0.00412	0.16077			2322.88	0.00882	0.52944																												Inf	--	--
	3074.09	0.00401	0.14827																																	Inf	--	--
	3064.66	0.00398	0.16733																																	Inf	--	--
	3055.3	0.00406	0.1707																																	Inf	--	--
	3045.99	0.00405	0.17029																																	Inf	--	--
	3036.74	0.00401	0.18869																																	Inf	--	--
	3027.55	0.00398	0.1712																																	Inf	--	--
	3022.97	0.00404	0.14553																																	Inf	--	--
	3018.41	0.00403	0.14909																																	Inf	--	--
	3013.86	0.00403	0.18552																																	Inf	--	--
	3009.33	0.00405	0.18233																																	Inf	--	--
	3004.81	0.00403	0.15707																																	Inf	--	--
	3000.3	0.00407	0.15451																																	Inf	--	--
	2995.81	0.004	0.15206																																	Inf	--	--
	2991.32	0.004	0.15182																																	Inf	--	--
	2986.86	0.00404	0.18601																																	Inf	--	--
	2982.4	0.00404	0.17387																																	Inf	--	--
	2977.96	0.00407	0.1793																																	Inf	--	--
	2969.12	0.00412	0.18936																																	Inf	--	--
	2964.72	0.19484	0.16996																																	Inf	--	--
	2960.33	0.00407	0.17507
	2955.96	0.0041	0.16406
	2951.59	0.00411	0.19302
	2947.24	0.0041	0.16401
	2942.91	0.20654	0.17704
	2938.58	0.00424	0.16522
	2934.27	0.00425	0.1868
	2929.97	0.00427	0.18379
	2925.69	0.00427	0.17081
	2921.41	0.0044	0.20678
	2917.15	0.20653	0.18016
	2912.9	0.0044	0.20245
	2908.67	0.00446	0.18742
	2900.23	0.00438	0.19729
	2896.03	0.00444	0.19081
	2891.84	0.18314	0.16528
	2887.67	0.00451	0.20303
	2879.36	0.19999	0.18666
	2875.22	0.0046	0.2025
	2871.09	0.19476	0.19012
	2866.97	0.00463	0.21283
	2862.87	0.19767	0.19297
	2858.78	0.00469	0.18276
	2854.7	0.00466	0.18651
	2850.63	0.00471	0.19797

## Sheet: Figure_3
a)	lambda [nm]	σ 10-20 cm2	Noise		b)	lambda [nm]	1a	1b	1c
	225	7.4249	0.67438			185.051	1.57715e-29	9.98843e-30	2.94316e-22
	226	6.17491	0.63271			185.058	1.64761e-29	1.04413e-29	3.05687e-22
	227	8.08235	0.74763			185.065	1.72119e-29	1.09146e-29	3.17492e-22
	228	5.59408	0.62945			185.071	1.79804e-29	1.14092e-29	3.29747e-22
	229	5.63196	0.65953			185.078	1.87828e-29	1.19259e-29	3.42471e-22
	230	6.89114	0.76388			185.085	1.96208e-29	1.24659e-29	3.5568e-22
	231	5.44757	0.54684			185.092	2.04958e-29	1.30302e-29	3.69393e-22
	232	5.71871	0.57725			185.099	2.14096e-29	1.36197e-29	3.83629e-22
	233	5.08608	0.66583			185.106	2.23637e-29	1.42358e-29	3.98408e-22
	234	5.33078	0.62212			185.113	2.33599e-29	1.48794e-29	4.13749e-22
	235	5.3126	0.53643			185.12	2.44002e-29	1.55519e-29	4.29674e-22
	240	4.6628	0.53388			185.127	2.54864e-29	1.62546e-29	4.46206e-22
	245	2.98681	0.50214			185.134	2.66206e-29	1.69888e-29	4.63366e-22
	250	1.89252	0.48702			185.141	2.78048e-29	1.77558e-29	4.81179e-22
	255	1.54924	0.5027			185.147	2.90412e-29	1.85572e-29	4.9967e-22
	260	0.84842	0.39786			185.154	3.03322e-29	1.93945e-29	5.18862e-22
	265	1.97952	0.60511			185.161	3.168e-29	2.02692e-29	5.38784e-22
	270	1.44248	0.42521			185.168	3.30873e-29	2.1183e-29	5.59462e-22
	275	2.04171	0.75529			185.175	3.45565e-29	2.21377e-29	5.80925e-22
	280	4.80687	0.85652			185.182	3.60904e-29	2.31351e-29	6.03202e-22
	285	2.88575	0.84109			185.189	3.76918e-29	2.41771e-29	6.26323e-22
	290	4.10265	0.93121			185.196	3.93636e-29	2.52656e-29	6.50321e-22
	295	2.50355	0.98409			185.203	4.1109e-29	2.64026e-29	6.75228e-22
	300	1.0612	0.41367			185.21	4.29311e-29	2.75905e-29	7.01078e-22
	305	0.84797	0.32528			185.217	4.48333e-29	2.88313e-29	7.27906e-22
	310	0.65514	0.28105			185.224	4.6819e-29	3.01275e-29	7.5575e-22
	315	0.54825	0.21484			185.23	4.88919e-29	3.14814e-29	7.84646e-22
	320	0.52602	0.24571			185.237	5.10559e-29	3.28957e-29	8.14635e-22
	325	0.5832	0.30571			185.244	5.33147e-29	3.4373e-29	8.45757e-22
	330	6.66995	2.70735			185.251	5.56727e-29	3.59161e-29	8.78055e-22
	335	5.83951	2.06906			185.258	5.81341e-29	3.75279e-29	9.11572e-22
	340	8.52422	2.15243			185.265	6.07033e-29	3.92114e-29	9.46354e-22
	345	7.58193	3.05			185.272	6.33851e-29	4.09699e-29	9.82448e-22
	350	9.29011	2.1437			185.279	6.61844e-29	4.28065e-29	1.0199e-21
	355	8.23482	3.0898			185.286	6.91062e-29	4.47247e-29	1.05877e-21
	360	4.42628	2.30295			185.293	7.21559e-29	4.67282e-29	1.0991e-21
	365	10.7854	2.68881			185.3	7.5339e-29	4.88207e-29	1.14095e-21
	370	4.22673	2.01841			185.307	7.86614e-29	5.10061e-29	1.18438e-21
	375	6.33969	3.69871			185.314	8.2129e-29	5.32886e-29	1.22943e-21
	380	3.63181	3.20337			185.32	8.57481e-29	5.56723e-29	1.27619e-21
	385	4.19578	3.80074			185.327	8.95253e-29	5.81617e-29	1.3247e-21
	390	0	4.59363			185.334	9.34675e-29	6.07615e-29	1.37503e-21
	395	4.13328	3.87434			185.341	9.75818e-29	6.34766e-29	1.42726e-21
	400	5.20838	3.96654			185.348	1.01876e-28	6.63119e-29	1.48144e-21
						185.355	1.06357e-28	6.92729e-29	1.53766e-21
						185.362	1.11033e-28	7.23649e-29	1.59599e-21
						185.369	1.15914e-28	7.55938e-29	1.65651e-21
						185.376	1.21007e-28	7.89655e-29	1.71929e-21
						185.383	1.26321e-28	8.24864e-29	1.78443e-21
						185.39	1.31868e-28	8.61629e-29	1.852e-21
						185.397	1.37655e-28	9.00019e-29	1.92211e-21
						185.404	1.43695e-28	9.40105e-29	1.99483e-21
						185.411	1.49997e-28	9.81961e-29	2.07028e-21
						185.417	1.56573e-28	1.02567e-28	2.14855e-21
						185.424	1.63435e-28	1.0713e-28	2.22974e-21
						185.431	1.70595e-28	1.11894e-28	2.31397e-21
						185.438	1.78065e-28	1.16869e-28	2.40134e-21
						185.445	1.85861e-28	1.22063e-28	2.49197e-21
						185.452	1.93994e-28	1.27486e-28	2.58598e-21
						185.459	2.0248e-28	1.33148e-28	2.6835e-21
						185.466	2.11335e-28	1.39059e-28	2.78465e-21
						185.473	2.20573e-28	1.4523e-28	2.88957e-21
						185.48	2.30211e-28	1.51672e-28	2.9984e-21
						185.487	2.40267e-28	1.58399e-28	3.11128e-21
						185.494	2.50758e-28	1.6542e-28	3.22836e-21
						185.501	2.61703e-28	1.72751e-28	3.34979e-21
						185.508	2.73122e-28	1.80403e-28	3.47574e-21
						185.515	2.85034e-28	1.88392e-28	3.60637e-21
						185.521	2.97462e-28	1.96731e-28	3.74185e-21
						185.528	3.10427e-28	2.05437e-28	3.88236e-21
						185.535	3.23951e-28	2.14524e-28	4.02808e-21
						185.542	3.3806e-28	2.2401e-28	4.17921e-21
						185.549	3.52778e-28	2.33911e-28	4.33595e-21
						185.556	3.68131e-28	2.44247e-28	4.49849e-21
						185.563	3.84146e-28	2.55035e-28	4.66706e-21
						185.57	4.00851e-28	2.66296e-28	4.84186e-21
						185.577	4.18277e-28	2.78049e-28	5.02314e-21
						185.584	4.36454e-28	2.90317e-28	5.21112e-21
						185.591	4.55413e-28	3.03122e-28	5.40606e-21
						185.598	4.75189e-28	3.16486e-28	5.6082e-21
						185.605	4.95816e-28	3.30434e-28	5.81781e-21
						185.612	5.1733e-28	3.44992e-28	6.03517e-21
						185.619	5.39769e-28	3.60186e-28	6.26055e-21
						185.626	5.63173e-28	3.76043e-28	6.49424e-21
						185.633	5.87583e-28	3.92593e-28	6.73656e-21
						185.64	6.13041e-28	4.09864e-28	6.9878e-21
						185.646	6.39593e-28	4.27888e-28	7.24831e-21
						185.653	6.67284e-28	4.46699e-28	7.51842e-21
						185.66	6.96163e-28	4.66329e-28	7.79847e-21
						185.667	7.26281e-28	4.86814e-28	8.08883e-21
						185.674	7.57691e-28	5.08191e-28	8.38987e-21
						185.681	7.90446e-28	5.30499e-28	8.70198e-21
						185.688	8.24605e-28	5.53777e-28	9.02556e-21
						185.695	8.60227e-28	5.78068e-28	9.36103e-21
						185.702	8.97374e-28	6.03415e-28	9.70883e-21
						185.709	9.36111e-28	6.29864e-28	1.00694e-20
						185.716	9.76504e-28	6.57463e-28	1.04432e-20
						185.723	1.01863e-27	6.8626e-28	1.08307e-20
						185.73	1.06255e-27	7.16307e-28	1.12324e-20
						185.737	1.10834e-27	7.47658e-28	1.16488e-20
						185.744	1.1561e-27	7.80369e-28	1.20805e-20
						185.751	1.20589e-27	8.145e-28	1.2528e-20
						185.758	1.25781e-27	8.50109e-28	1.29918e-20
						185.765	1.31195e-27	8.87262e-28	1.34727e-20
						185.772	1.36839e-27	9.26025e-28	1.39711e-20
						185.779	1.42724e-27	9.66466e-28	1.44877e-20
						185.786	1.48859e-27	1.00866e-27	1.50232e-20
						185.793	1.55256e-27	1.05267e-27	1.55782e-20
						185.799	1.61926e-27	1.0986e-27	1.61536e-20
						185.806	1.68879e-27	1.1465e-27	1.67499e-20
						185.813	1.76129e-27	1.19648e-27	1.73679e-20
						185.82	1.83686e-27	1.24862e-27	1.80085e-20
						185.827	1.91565e-27	1.30301e-27	1.86724e-20
						185.834	1.99779e-27	1.35974e-27	1.93605e-20
						185.841	2.08342e-27	1.41893e-27	2.00737e-20
						185.848	2.17268e-27	1.48067e-27	2.08127e-20
						185.855	2.26574e-27	1.54507e-27	2.15787e-20
						185.862	2.36274e-27	1.61225e-27	2.23726e-20
						185.869	2.46386e-27	1.68232e-27	2.31952e-20
						185.876	2.56927e-27	1.75541e-27	2.40478e-20
						185.883	2.67914e-27	1.83165e-27	2.49313e-20
						185.89	2.79367e-27	1.91117e-27	2.58469e-20
						185.897	2.91305e-27	1.99411e-27	2.67957e-20
						185.904	3.03749e-27	2.08062e-27	2.77788e-20
						185.911	3.16719e-27	2.17085e-27	2.87977e-20
						185.918	3.30238e-27	2.26496e-27	2.98534e-20
						185.925	3.44329e-27	2.36311e-27	3.09474e-20
						185.932	3.59016e-27	2.46548e-27	3.20809e-20
						185.939	3.74323e-27	2.57224e-27	3.32555e-20
						185.946	3.90277e-27	2.68358e-27	3.44725e-20
						185.953	4.06905e-27	2.7997e-27	3.57336e-20
						185.96	4.24234e-27	2.9208e-27	3.70402e-20
						185.967	4.42295e-27	3.04709e-27	3.83939e-20
						185.974	4.61117e-27	3.17879e-27	3.97966e-20
						185.981	4.80733e-27	3.31613e-27	4.12499e-20
						185.988	5.01176e-27	3.45936e-27	4.27555e-20
						185.995	5.2248e-27	3.60871e-27	4.43155e-20
						186.002	5.44682e-27	3.76446e-27	4.59317e-20
						186.009	5.67818e-27	3.92686e-27	4.7606e-20
						186.016	5.91927e-27	4.09621e-27	4.93407e-20
						186.023	6.17051e-27	4.2728e-27	5.11378e-20
						186.029	6.43232e-27	4.45693e-27	5.29995e-20
						186.036	6.70512e-27	4.64892e-27	5.49282e-20
						186.043	6.98939e-27	4.84911e-27	5.69261e-20
						186.05	7.2856e-27	5.05785e-27	5.89959e-20
						186.057	7.59425e-27	5.27549e-27	6.114e-20
						186.064	7.91585e-27	5.5024e-27	6.3361e-20
						186.071	8.25094e-27	5.73899e-27	6.56616e-20
						186.078	8.60008e-27	5.98566e-27	6.80448e-20
						186.085	8.96387e-27	6.24284e-27	7.05134e-20
						186.092	9.34289e-27	6.51096e-27	7.30705e-20
						186.099	9.73779e-27	6.7905e-27	7.57191e-20
						186.106	1.01492e-26	7.08193e-27	7.84625e-20
						186.113	1.05779e-26	7.38575e-27	8.1304e-20
						186.12	1.10245e-26	7.70249e-27	8.42472e-20
						186.127	1.14897e-26	8.03269e-27	8.72956e-20
						186.134	1.19745e-26	8.37692e-27	9.04529e-20
						186.141	1.24794e-26	8.73576e-27	9.37229e-20
						186.148	1.30055e-26	9.10984e-27	9.71097e-20
						186.155	1.35536e-26	9.49978e-27	1.00617e-19
						186.162	1.41245e-26	9.90627e-27	1.0425e-19
						186.169	1.47192e-26	1.033e-26	1.08012e-19
						186.176	1.53388e-26	1.07717e-26	1.11909e-19
						186.183	1.59842e-26	1.12321e-26	1.15944e-19
						186.19	1.66564e-26	1.17119e-26	1.20122e-19
						186.197	1.73567e-26	1.22121e-26	1.2445e-19
						186.204	1.80862e-26	1.27335e-26	1.28931e-19
						186.211	1.8846e-26	1.32769e-26	1.33572e-19
						186.218	1.96374e-26	1.38433e-26	1.38377e-19
						186.225	2.04618e-26	1.44337e-26	1.43353e-19
						186.232	2.13204e-26	1.5049e-26	1.48506e-19
						186.239	2.22147e-26	1.56902e-26	1.53842e-19
						186.246	2.31462e-26	1.63586e-26	1.59367e-19
						186.253	2.41164e-26	1.70552e-26	1.65088e-19
						186.26	2.51268e-26	1.77811e-26	1.71012e-19
						186.267	2.61792e-26	1.85376e-26	1.77145e-19
						186.274	2.72752e-26	1.93261e-26	1.83496e-19
						186.281	2.84167e-26	2.01478e-26	1.90071e-19
						186.288	2.96055e-26	2.10041e-26	1.9688e-19
						186.295	3.08435e-26	2.18964e-26	2.03928e-19
						186.302	3.21329e-26	2.28263e-26	2.11226e-19
						186.309	3.34756e-26	2.37953e-26	2.18782e-19
						186.316	3.48739e-26	2.48051e-26	2.26605e-19
						186.323	3.633e-26	2.58573e-26	2.34703e-19
						186.33	3.78464e-26	2.69538e-26	2.43088e-19
						186.337	3.94254e-26	2.80963e-26	2.51768e-19
						186.344	4.10697e-26	2.92868e-26	2.60754e-19
						186.351	4.27819e-26	3.05273e-26	2.70056e-19
						186.358	4.45648e-26	3.18198e-26	2.79686e-19
						186.365	4.64212e-26	3.31665e-26	2.89656e-19
						186.372	4.83543e-26	3.45698e-26	2.99975e-19
						186.379	5.03671e-26	3.60318e-26	3.10658e-19
						186.386	5.24629e-26	3.7555e-26	3.21717e-19
						186.393	5.4645e-26	3.91421e-26	3.33163e-19
						186.4	5.6917e-26	4.07956e-26	3.45012e-19
						186.407	5.92826e-26	4.25183e-26	3.57277e-19
						186.414	6.17455e-26	4.43131e-26	3.69972e-19
						186.421	6.43098e-26	4.61829e-26	3.83112e-19
						186.428	6.69796e-26	4.81309e-26	3.96713e-19
						186.435	6.97591e-26	5.01603e-26	4.10791e-19
						186.442	7.26528e-26	5.22744e-26	4.25361e-19
						186.449	7.56654e-26	5.44768e-26	4.40442e-19
						186.456	7.88017e-26	5.67711e-26	4.5605e-19
						186.463	8.20667e-26	5.91611e-26	4.72204e-19
						186.47	8.54657e-26	6.16509e-26	4.88923e-19
						186.477	8.90041e-26	6.42443e-26	5.06226e-19
						186.484	9.26876e-26	6.69459e-26	5.24134e-19
						186.491	9.6522e-26	6.976e-26	5.42666e-19
						186.498	1.00514e-25	7.26913e-26	5.61845e-19
						186.505	1.04668e-25	7.57446e-26	5.81694e-19
						186.512	1.08994e-25	7.89249e-26	6.02234e-19
						186.519	1.13496e-25	8.22374e-26	6.2349e-19
						186.526	1.18182e-25	8.56877e-26	6.45486e-19
						186.533	1.23059e-25	8.92814e-26	6.68248e-19
						186.54	1.28137e-25	9.30244e-26	6.91802e-19
						186.547	1.33421e-25	9.69228e-26	7.16175e-19
						186.554	1.38921e-25	1.00983e-25	7.41396e-19
						186.561	1.44646e-25	1.05212e-25	7.67493e-19
						186.568	1.50605e-25	1.09616e-25	7.94496e-19
						186.575	1.56806e-25	1.14202e-25	8.22437e-19
						186.582	1.6326e-25	1.18979e-25	8.51347e-19
						186.589	1.69978e-25	1.23954e-25	8.81261e-19
						186.596	1.76969e-25	1.29134e-25	9.12211e-19
						186.603	1.84244e-25	1.3453e-25	9.44234e-19
						186.61	1.91816e-25	1.40148e-25	9.77366e-19
						186.618	1.99696e-25	1.45999e-25	1.01165e-18
						186.625	2.07897e-25	1.52091e-25	1.04711e-18
						186.632	2.16431e-25	1.58436e-25	1.0838e-18
						186.639	2.25312e-25	1.65042e-25	1.12176e-18
						186.646	2.34553e-25	1.71922e-25	1.16104e-18
						186.653	2.4417e-25	1.79085e-25	1.20167e-18
						186.66	2.54177e-25	1.86544e-25	1.2437e-18
						186.667	2.64591e-25	1.94311e-25	1.28718e-18
						186.674	2.75426e-25	2.02398e-25	1.33216e-18
						186.681	2.86701e-25	2.10818e-25	1.37869e-18
						186.688	2.98433e-25	2.19586e-25	1.42683e-18
						186.695	3.10641e-25	2.28714e-25	1.47663e-18
						186.702	3.23342e-25	2.38218e-25	1.52813e-18
						186.709	3.36558e-25	2.48113e-25	1.58142e-18
						186.716	3.50309e-25	2.58416e-25	1.63653e-18
						186.723	3.64616e-25	2.69142e-25	1.69354e-18
						186.73	3.79501e-25	2.80308e-25	1.75251e-18
						186.737	3.94988e-25	2.91934e-25	1.8135e-18
						186.744	4.111e-25	3.04037e-25	1.87659e-18
						186.751	4.27863e-25	3.16637e-25	1.94184e-18
						186.758	4.45303e-25	3.29755e-25	2.00933e-18
						186.765	4.63447e-25	3.4341e-25	2.07914e-18
						186.772	4.82323e-25	3.57625e-25	2.15133e-18
						186.779	5.01959e-25	3.72423e-25	2.226e-18
						186.786	5.22387e-25	3.87828e-25	2.30323e-18
						186.793	5.43638e-25	4.03863e-25	2.3831e-18
						186.8	5.65745e-25	4.20555e-25	2.4657e-18
						186.807	5.88741e-25	4.3793e-25	2.55112e-18
						186.814	6.12663e-25	4.56016e-25	2.63947e-18
						186.821	6.37547e-25	4.74841e-25	2.73083e-18
						186.828	6.63432e-25	4.94436e-25	2.82531e-18
						186.835	6.90357e-25	5.14832e-25	2.92301e-18
						186.842	7.18363e-25	5.36061e-25	3.02405e-18
						186.85	7.47494e-25	5.58156e-25	3.12853e-18
						186.857	7.77795e-25	5.81154e-25	3.23657e-18
						186.864	8.09312e-25	6.05089e-25	3.34829e-18
						186.871	8.42092e-25	6.30001e-25	3.46382e-18
						186.878	8.76187e-25	6.55929e-25	3.58327e-18
						186.885	9.11648e-25	6.82912e-25	3.70679e-18
						186.892	9.4853e-25	7.10995e-25	3.83451e-18
						186.899	9.86888e-25	7.40222e-25	3.96657e-18
						186.906	1.02678e-24	7.70638e-25	4.10311e-18
						186.913	1.06827e-24	8.02291e-25	4.24429e-18
						186.92	1.11142e-24	8.35232e-25	4.39026e-18
						186.927	1.1563e-24	8.69512e-25	4.54118e-18
						186.934	1.20297e-24	9.05185e-25	4.69721e-18
						186.941	1.2515e-24	9.42307e-25	4.85854e-18
						186.948	1.30197e-24	9.80936e-25	5.02532e-18
						186.955	1.35445e-24	1.02113e-24	5.19775e-18
						186.962	1.40903e-24	1.06296e-24	5.37602e-18
						186.969	1.46579e-24	1.10649e-24	5.56032e-18
						186.976	1.52481e-24	1.15177e-24	5.75084e-18
						186.983	1.58618e-24	1.1989e-24	5.9478e-18
						186.99	1.64999e-24	1.24793e-24	6.15142e-18
						186.997	1.71635e-24	1.29895e-24	6.3619e-18
						187.005	1.78535e-24	1.35203e-24	6.57949e-18
						187.012	1.85709e-24	1.40726e-24	6.80442e-18
						187.019	1.93168e-24	1.46473e-24	7.03693e-18
						187.026	2.00924e-24	1.52452e-24	7.27727e-18
						187.033	2.08989e-24	1.58672e-24	7.52571e-18
						187.04	2.17373e-24	1.65144e-24	7.7825e-18
						187.047	2.26091e-24	1.71877e-24	8.04794e-18
						187.054	2.35154e-24	1.78881e-24	8.3223e-18
						187.061	2.44578e-24	1.86169e-24	8.60589e-18
						187.068	2.54374e-24	1.9375e-24	8.899e-18
						187.075	2.64559e-24	2.01637e-24	9.20195e-18
						187.082	2.75148e-24	2.09841e-24	9.51508e-18
						187.089	2.86156e-24	2.18376e-24	9.8387e-18
						187.096	2.976e-24	2.27255e-24	1.01732e-17
						187.103	3.09497e-24	2.36491e-24	1.05189e-17
						187.11	3.21864e-24	2.46099e-24	1.08761e-17
						187.117	3.34721e-24	2.56093e-24	1.12454e-17
						187.124	3.48086e-24	2.66489e-24	1.1627e-17
						187.132	3.61978e-24	2.77303e-24	1.20213e-17
						187.139	3.7642e-24	2.88551e-24	1.24288e-17
						187.146	3.91431e-24	3.00251e-24	1.285e-17
						187.153	4.07035e-24	3.1242e-24	1.32852e-17
						187.16	4.23255e-24	3.25077e-24	1.3735e-17
						187.167	4.40114e-24	3.38242e-24	1.41997e-17
						187.174	4.57637e-24	3.51935e-24	1.468e-17
						187.181	4.75851e-24	3.66177e-24	1.51763e-17
						187.188	4.94782e-24	3.80989e-24	1.56891e-17
						187.195	5.14459e-24	3.96394e-24	1.6219e-17
						187.202	5.34909e-24	4.12415e-24	1.67665e-17
						187.209	5.56164e-24	4.29078e-24	1.73323e-17
						187.216	5.78255e-24	4.46407e-24	1.79168e-17
						187.223	6.01214e-24	4.64428e-24	1.85208e-17
						187.23	6.25075e-24	4.8317e-24	1.91449e-17
						187.238	6.49873e-24	5.0266e-24	1.97897e-17
						187.245	6.75644e-24	5.22928e-24	2.04559e-17
						187.252	7.02427e-24	5.44006e-24	2.11442e-17
						187.259	7.30259e-24	5.65924e-24	2.18553e-17
						187.266	7.59183e-24	5.88716e-24	2.25901e-17
						187.273	7.89241e-24	6.12417e-24	2.33491e-17
						187.28	8.20476e-24	6.37062e-24	2.41333e-17
						187.287	8.52934e-24	6.62689e-24	2.49434e-17
						187.294	8.86662e-24	6.89336e-24	2.57803e-17
						187.301	9.2171e-24	7.17043e-24	2.66449e-17
						187.308	9.58128e-24	7.45853e-24	2.75381e-17
						187.315	9.9597e-24	7.75808e-24	2.84608e-17
						187.322	1.03529e-23	8.06954e-24	2.9414e-17
						187.329	1.07615e-23	8.39338e-24	3.03986e-17
						187.337	1.1186e-23	8.73007e-24	3.14157e-17
						187.344	1.16271e-23	9.08013e-24	3.24663e-17
						187.351	1.20854e-23	9.44409e-24	3.35515e-17
						187.358	1.25615e-23	9.82248e-24	3.46725e-17
						187.365	1.30562e-23	1.02159e-23	3.58304e-17
						187.372	1.35702e-23	1.06249e-23	3.70264e-17
						187.379	1.41043e-23	1.10501e-23	3.82618e-17
						187.386	1.46591e-23	1.14921e-23	3.95377e-17
						187.393	1.52355e-23	1.19516e-23	4.08556e-17
						187.4	1.58343e-23	1.24293e-23	4.22168e-17
						187.407	1.64564e-23	1.29259e-23	4.36226e-17
						187.414	1.71026e-23	1.34422e-23	4.50745e-17
						187.421	1.7774e-23	1.39788e-23	4.65741e-17
						187.429	1.84715e-23	1.45367e-23	4.81229e-17
						187.436	1.9196e-23	1.51166e-23	4.97223e-17
						187.443	1.99486e-23	1.57193e-23	5.13742e-17
						187.45	2.07305e-23	1.63459e-23	5.30801e-17
						187.457	2.15426e-23	1.69971e-23	5.48418e-17
						187.464	2.23862e-23	1.76741e-23	5.66611e-17
						187.471	2.32625e-23	1.83777e-23	5.85399e-17
						187.478	2.41727e-23	1.9109e-23	6.04801e-17
						187.485	2.51181e-23	1.98692e-23	6.24836e-17
						187.492	2.61002e-23	2.06592e-23	6.45525e-17
						187.499	2.71202e-23	2.14804e-23	6.66888e-17
						187.507	2.81796e-23	2.23338e-23	6.88949e-17
						187.514	2.92799e-23	2.32208e-23	7.11728e-17
						187.521	3.04228e-23	2.41426e-23	7.35249e-17
						187.528	3.16098e-23	2.51007e-23	7.59535e-17
						187.535	3.28426e-23	2.60963e-23	7.84612e-17
						187.542	3.41229e-23	2.71311e-23	8.10505e-17
						187.549	3.54526e-23	2.82064e-23	8.37239e-17
						187.556	3.68336e-23	2.93239e-23	8.64841e-17
						187.563	3.82677e-23	3.04852e-23	8.9334e-17
						187.57	3.97571e-23	3.16921e-23	9.22765e-17
						187.577	4.13038e-23	3.29461e-23	9.53143e-17
						187.585	4.291e-23	3.42493e-23	9.84507e-17
						187.592	4.4578e-23	3.56035e-23	1.01689e-16
						187.599	4.63102e-23	3.70107e-23	1.05032e-16
						187.606	4.81089e-23	3.84729e-23	1.08483e-16
						187.613	4.99767e-23	3.99922e-23	1.12046e-16
						187.62	5.19162e-23	4.15709e-23	1.15724e-16
						187.627	5.39301e-23	4.32113e-23	1.19521e-16
						187.634	5.60213e-23	4.49157e-23	1.2344e-16
						187.641	5.81927e-23	4.66866e-23	1.27487e-16
						187.648	6.04474e-23	4.85265e-23	1.31664e-16
						187.656	6.27884e-23	5.04383e-23	1.35975e-16
						187.663	6.52191e-23	5.24245e-23	1.40426e-16
						187.67	6.77428e-23	5.44881e-23	1.4502e-16
						187.677	7.03632e-23	5.6632e-23	1.49762e-16
						187.684	7.30837e-23	5.88595e-23	1.54657e-16
						187.691	7.59083e-23	6.11736e-23	1.5971e-16
						187.698	7.88408e-23	6.35776e-23	1.64925e-16
						187.705	8.18854e-23	6.60752e-23	1.70308e-16
						187.712	8.50462e-23	6.86698e-23	1.75863e-16
						187.719	8.83276e-23	7.13652e-23	1.81597e-16
						187.727	9.17343e-23	7.41653e-23	1.87516e-16
						187.734	9.52709e-23	7.7074e-23	1.93624e-16
						187.741	9.89423e-23	8.00956e-23	1.99928e-16
						187.748	1.02754e-22	8.32343e-23	2.06434e-16
						187.755	1.0671e-22	8.64948e-23	2.13149e-16
						187.762	1.10817e-22	8.98815e-23	2.20078e-16
						187.769	1.15081e-22	9.33995e-23	2.2723e-16
						187.776	1.19506e-22	9.70536e-23	2.3461e-16
						187.783	1.241e-22	1.00849e-22	2.42227e-16
						187.791	1.28869e-22	1.04792e-22	2.50086e-16
						187.798	1.33818e-22	1.08886e-22	2.58197e-16
						187.805	1.38956e-22	1.1314e-22	2.66567e-16
						187.812	1.44289e-22	1.17557e-22	2.75204e-16
						187.819	1.49824e-22	1.22145e-22	2.84116e-16
						187.826	1.55569e-22	1.2691e-22	2.93313e-16
						187.833	1.61532e-22	1.31859e-22	3.02803e-16
						187.84	1.6772e-22	1.36999e-22	3.12594e-16
						187.847	1.74144e-22	1.42337e-22	3.22698e-16
						187.855	1.8081e-22	1.47881e-22	3.33123e-16
						187.862	1.87729e-22	1.53638e-22	3.4388e-16
						187.869	1.94909e-22	1.59617e-22	3.54978e-16
						187.876	2.02361e-22	1.65826e-22	3.66429e-16
						187.883	2.10095e-22	1.72274e-22	3.78244e-16
						187.89	2.1812e-22	1.7897e-22	3.90434e-16
						187.897	2.26449e-22	1.85924e-22	4.0301e-16
						187.904	2.35093e-22	1.93144e-22	4.15986e-16
						187.911	2.44062e-22	2.00642e-22	4.29372e-16
						187.919	2.5337e-22	2.08428e-22	4.43182e-16
						187.926	2.63029e-22	2.16513e-22	4.5743e-16
						187.933	2.73052e-22	2.24908e-22	4.72128e-16
						187.94	2.83452e-22	2.33624e-22	4.87292e-16
						187.947	2.94244e-22	2.42675e-22	5.02934e-16
						187.954	3.05442e-22	2.52073e-22	5.19071e-16
						187.961	3.17062e-22	2.6183e-22	5.35717e-16
						187.968	3.29118e-22	2.71961e-22	5.52889e-16
						187.976	3.41628e-22	2.82479e-22	5.70603e-16
						187.983	3.54607e-22	2.934e-22	5.88875e-16
						187.99	3.68075e-22	3.04739e-22	6.07722e-16
						187.997	3.82047e-22	3.16511e-22	6.27164e-16
						188.004	3.96544e-22	3.28732e-22	6.47217e-16
						188.011	4.11585e-22	3.4142e-22	6.67902e-16
						188.018	4.2719e-22	3.54592e-22	6.89237e-16
						188.025	4.43379e-22	3.68267e-22	7.11243e-16
						188.033	4.60175e-22	3.82464e-22	7.3394e-16
						188.04	4.776e-22	3.97201e-22	7.5735e-16
						188.047	4.95677e-22	4.12501e-22	7.81495e-16
						188.054	5.14431e-22	4.28382e-22	8.06397e-16
						188.061	5.33885e-22	4.44869e-22	8.3208e-16
						188.068	5.54067e-22	4.61983e-22	8.58567e-16
						188.075	5.75003e-22	4.79748e-22	8.85885e-16
						188.083	5.96721e-22	4.98188e-22	9.14057e-16
						188.09	6.1925e-22	5.17329e-22	9.43112e-16
						188.097	6.42619e-22	5.37197e-22	9.73074e-16
						188.104	6.6686e-22	5.5782e-22	1.00397e-15
						188.111	6.92005e-22	5.79226e-22	1.03584e-15
						188.118	7.18086e-22	6.01444e-22	1.0687e-15
						188.125	7.4514e-22	6.24504e-22	1.10258e-15
						188.132	7.732e-22	6.48439e-22	1.13753e-15
						188.14	8.02305e-22	6.7328e-22	1.17356e-15
						188.147	8.32493e-22	6.99063e-22	1.21071e-15
						188.154	8.63804e-22	7.25822e-22	1.24903e-15
						188.161	8.96278e-22	7.53593e-22	1.28853e-15
						188.168	9.29958e-22	7.82415e-22	1.32926e-15
						188.175	9.6489e-22	8.12327e-22	1.37126e-15
						188.182	1.00112e-21	8.43369e-22	1.41457e-15
						188.19	1.03869e-21	8.75585e-22	1.45922e-15
						188.197	1.07766e-21	9.09017e-22	1.50526e-15
						188.204	1.11807e-21	9.4371e-22	1.55273e-15
						188.211	1.15998e-21	9.79713e-22	1.60167e-15
						188.218	1.20344e-21	1.01707e-21	1.65212e-15
						188.225	1.24851e-21	1.05584e-21	1.70414e-15
						188.232	1.29524e-21	1.09607e-21	1.75777e-15
						188.24	1.34371e-21	1.13782e-21	1.81307e-15
						188.247	1.39397e-21	1.18114e-21	1.87007e-15
						188.254	1.44609e-21	1.22609e-21	1.92883e-15
						188.261	1.50013e-21	1.27272e-21	1.98941e-15
						188.268	1.55616e-21	1.32112e-21	2.05187e-15
						188.275	1.61427e-21	1.37133e-21	2.11625e-15
						188.282	1.67452e-21	1.42343e-21	2.18261e-15
						188.29	1.73699e-21	1.47748e-21	2.25103e-15
						188.297	1.80177e-21	1.53357e-21	2.32155e-15
						188.304	1.86893e-21	1.59175e-21	2.39425e-15
						188.311	1.93856e-21	1.65212e-21	2.46918e-15
						188.318	2.01076e-21	1.71476e-21	2.54642e-15
						188.325	2.08562e-21	1.77974e-21	2.62604e-15
						188.333	2.16322e-21	1.84716e-21	2.70811e-15
						188.34	2.24369e-21	1.91709e-21	2.7927e-15
						188.347	2.32711e-21	1.98965e-21	2.87988e-15
						188.354	2.41359e-21	2.06492e-21	2.96974e-15
						188.361	2.50325e-21	2.14301e-21	3.06236e-15
						188.368	2.5962e-21	2.22402e-21	3.15783e-15
						188.375	2.69256e-21	2.30805e-21	3.25621e-15
						188.383	2.79245e-21	2.39522e-21	3.35761e-15
						188.39	2.89601e-21	2.48564e-21	3.46212e-15
						188.397	3.00336e-21	2.57944e-21	3.56982e-15
						188.404	3.11464e-21	2.67674e-21	3.68082e-15
						188.411	3.22999e-21	2.77766e-21	3.79521e-15
						188.418	3.34957e-21	2.88234e-21	3.9131e-15
						188.426	3.47351e-21	2.99093e-21	4.03458e-15
						188.433	3.60199e-21	3.10356e-21	4.15978e-15
						188.44	3.73517e-21	3.22037e-21	4.2888e-15
						188.447	3.8732e-21	3.34154e-21	4.42174e-15
						188.454	4.01628e-21	3.46721e-21	4.55874e-15
						188.461	4.16458e-21	3.59755e-21	4.69992e-15
						188.469	4.31829e-21	3.73273e-21	4.84539e-15
						188.476	4.4776e-21	3.87294e-21	4.99529e-15
						188.483	4.64272e-21	4.01835e-21	5.14974e-15
						188.49	4.81385e-21	4.16915e-21	5.3089e-15
						188.497	4.99122e-21	4.32555e-21	5.47288e-15
						188.504	5.17504e-21	4.48774e-21	5.64185e-15
						188.511	5.36555e-21	4.65595e-21	5.81594e-15
						188.519	5.56298e-21	4.83038e-21	5.99532e-15
						188.526	5.76759e-21	5.01128e-21	6.18013e-15
						188.533	5.97964e-21	5.19887e-21	6.37055e-15
						188.54	6.19938e-21	5.39339e-21	6.56672e-15
						188.547	6.42711e-21	5.59511e-21	6.76884e-15
						188.554	6.66309e-21	5.80429e-21	6.97707e-15
						188.562	6.90763e-21	6.02119e-21	7.1916e-15
						188.569	7.16104e-21	6.24611e-21	7.41261e-15
						188.576	7.42363e-21	6.47932e-21	7.6403e-15
						188.583	7.69573e-21	6.72114e-21	7.87486e-15
						188.59	7.97769e-21	6.97188e-21	8.1165e-15
						188.598	8.26984e-21	7.23186e-21	8.36543e-15
						188.605	8.57256e-21	7.50142e-21	8.62186e-15
						188.612	8.88623e-21	7.78091e-21	8.88601e-15
						188.619	9.21123e-21	8.07068e-21	9.15812e-15
						188.626	9.54797e-21	8.37112e-21	9.43841e-15
						188.633	9.89687e-21	8.68262e-21	9.72714e-15
						188.641	1.02584e-20	9.00556e-21	1.00245e-14
						188.648	1.06329e-20	9.34037e-21	1.03309e-14
						188.655	1.10209e-20	9.68748e-21	1.06464e-14
						188.662	1.1423e-20	1.00473e-20	1.09714e-14
						188.669	1.18395e-20	1.04204e-20	1.13062e-14
						188.676	1.2271e-20	1.08072e-20	1.1651e-14
						188.684	1.2718e-20	1.12081e-20	1.20061e-14
						188.691	1.31811e-20	1.16237e-20	1.23719e-14
						188.698	1.36609e-20	1.20546e-20	1.27486e-14
						188.705	1.41579e-20	1.25012e-20	1.31366e-14
						188.712	1.46728e-20	1.29642e-20	1.35362e-14
						188.72	1.52061e-20	1.34441e-20	1.39477e-14
						188.727	1.57586e-20	1.39416e-20	1.43715e-14
						188.734	1.6331e-20	1.44572e-20	1.4808e-14
						188.741	1.69238e-20	1.49918e-20	1.52575e-14
						188.748	1.7538e-20	1.55458e-20	1.57204e-14
						188.755	1.81741e-20	1.612e-20	1.61971e-14
						188.763	1.8833e-20	1.67152e-20	1.6688e-14
						188.77	1.95155e-20	1.73322e-20	1.71935e-14
						188.777	2.02224e-20	1.79716e-20	1.77141e-14
						188.784	2.09546e-20	1.86343e-20	1.82501e-14
						188.791	2.17129e-20	1.93212e-20	1.88021e-14
						188.799	2.24984e-20	2.0033e-20	1.93705e-14
						188.806	2.33119e-20	2.07708e-20	1.99557e-14
						188.813	2.41545e-20	2.15354e-20	2.05584e-14
						188.82	2.50272e-20	2.23279e-20	2.11788e-14
						188.827	2.59309e-20	2.31491e-20	2.18177e-14
						188.834	2.68669e-20	2.40002e-20	2.24756e-14
						188.842	2.78363e-20	2.48821e-20	2.31529e-14
						188.849	2.88402e-20	2.57961e-20	2.38502e-14
						188.856	2.98798e-20	2.67433e-20	2.45682e-14
						188.863	3.09564e-20	2.77248e-20	2.53074e-14
						188.87	3.20713e-20	2.87418e-20	2.60685e-14
						188.878	3.32259e-20	2.97958e-20	2.6852e-14
						188.885	3.44215e-20	3.08879e-20	2.76587e-14
						188.892	3.56596e-20	3.20195e-20	2.84892e-14
						188.899	3.69417e-20	3.31921e-20	2.93441e-14
						188.906	3.82692e-20	3.44071e-20	3.02243e-14
						188.914	3.96439e-20	3.56661e-20	3.11304e-14
						188.921	4.10672e-20	3.69705e-20	3.20631e-14
						188.928	4.25411e-20	3.83221e-20	3.30233e-14
						188.935	4.40672e-20	3.97224e-20	3.40117e-14
						188.942	4.56473e-20	4.11733e-20	3.50292e-14
						188.95	4.72833e-20	4.26766e-20	3.60766e-14
						188.957	4.89772e-20	4.4234e-20	3.71547e-14
						188.964	5.07311e-20	4.58476e-20	3.82645e-14
						188.971	5.25469e-20	4.75193e-20	3.94068e-14
						188.978	5.44269e-20	4.92512e-20	4.05826e-14
						188.986	5.63732e-20	5.10454e-20	4.17928e-14
						188.993	5.83883e-20	5.29042e-20	4.30385e-14
						189	6.04745e-20	5.48299e-20	4.43206e-14
						189.007	6.26342e-20	5.68247e-20	4.56403e-14
						189.014	6.48701e-20	5.88913e-20	4.69985e-14
						189.022	6.71848e-20	6.1032e-20	4.83964e-14
						189.029	6.9581e-20	6.32496e-20	4.98351e-14
						189.036	7.20616e-20	6.55468e-20	5.13158e-14
						189.043	7.46294e-20	6.79263e-20	5.28397e-14
						189.05	7.72876e-20	7.03912e-20	5.4408e-14
						189.058	8.00392e-20	7.29444e-20	5.6022e-14
						189.065	8.28874e-20	7.5589e-20	5.7683e-14
						189.072	8.58358e-20	7.83283e-20	5.93924e-14
						189.079	8.88876e-20	8.11657e-20	6.11514e-14
						189.086	9.20465e-20	8.41045e-20	6.29617e-14
						189.094	9.53162e-20	8.71484e-20	6.48245e-14
						189.101	9.87006e-20	9.03011e-20	6.67414e-14
						189.108	1.02204e-19	9.35664e-20	6.8714e-14
						189.115	1.05829e-19	9.69483e-20	7.07437e-14
						189.123	1.09582e-19	1.00451e-19	7.28324e-14
						189.13	1.13466e-19	1.04078e-19	7.49815e-14
						189.137	1.17485e-19	1.07835e-19	7.71929e-14
						189.144	1.21646e-19	1.11726e-19	7.94684e-14
						189.151	1.25951e-19	1.15755e-19	8.18096e-14
						189.159	1.30407e-19	1.19928e-19	8.42185e-14
						189.166	1.35019e-19	1.2425e-19	8.66971e-14
						189.173	1.39792e-19	1.28725e-19	8.92472e-14
						189.18	1.44731e-19	1.33359e-19	9.1871e-14
						189.187	1.49842e-19	1.38158e-19	9.45704e-14
						189.195	1.55131e-19	1.43127e-19	9.73477e-14
						189.202	1.60605e-19	1.48273e-19	1.00205e-13
						189.209	1.66269e-19	1.53602e-19	1.03145e-13
						189.216	1.72131e-19	1.59119e-19	1.06169e-13
						189.224	1.78196e-19	1.64833e-19	1.0928e-13
						189.231	1.84472e-19	1.70749e-19	1.12481e-13
						189.238	1.90966e-19	1.76874e-19	1.15774e-13
						189.245	1.97686e-19	1.83216e-19	1.19161e-13
						189.252	2.04639e-19	1.89783e-19	1.22645e-13
						189.26	2.11833e-19	1.96583e-19	1.2623e-13
						189.267	2.19277e-19	2.03622e-19	1.29917e-13
						189.274	2.26979e-19	2.10911e-19	1.3371e-13
						189.281	2.34948e-19	2.18457e-19	1.37612e-13
						189.289	2.43193e-19	2.2627e-19	1.41625e-13
						189.296	2.51724e-19	2.34358e-19	1.45753e-13
						189.303	2.6055e-19	2.42732e-19	1.49999e-13
						189.31	2.69681e-19	2.51401e-19	1.54367e-13
						189.317	2.79127e-19	2.60376e-19	1.58859e-13
						189.325	2.88901e-19	2.69667e-19	1.6348e-13
						189.332	2.99011e-19	2.79285e-19	1.68232e-13
						189.339	3.09471e-19	2.89242e-19	1.7312e-13
						189.346	3.20292e-19	2.9955e-19	1.78147e-13
						189.354	3.31486e-19	3.10219e-19	1.83317e-13
						189.361	3.43066e-19	3.21265e-19	1.88635e-13
						189.368	3.55046e-19	3.32698e-19	1.94104e-13
						189.375	3.67438e-19	3.44532e-19	1.99728e-13
						189.383	3.80256e-19	3.56783e-19	2.05512e-13
						189.39	3.93516e-19	3.69463e-19	2.11461e-13
						189.397	4.07231e-19	3.82588e-19	2.17578e-13
						189.404	4.21419e-19	3.96173e-19	2.23869e-13
						189.411	4.36094e-19	4.10234e-19	2.30339e-13
						189.419	4.51273e-19	4.24788e-19	2.36991e-13
						189.426	4.66973e-19	4.39852e-19	2.43833e-13
						189.433	4.83212e-19	4.55442e-19	2.50867e-13
						189.44	5.00008e-19	4.71578e-19	2.58101e-13
						189.448	5.1738e-19	4.88278e-19	2.6554e-13
						189.455	5.35347e-19	5.05562e-19	2.73188e-13
						189.462	5.53929e-19	5.2345e-19	2.81053e-13
						189.469	5.73148e-19	5.41962e-19	2.8914e-13
						189.477	5.93025e-19	5.6112e-19	2.97455e-13
						189.484	6.13581e-19	5.80947e-19	3.06004e-13
						189.491	6.3484e-19	6.01465e-19	3.14794e-13
						189.498	6.56826e-19	6.22698e-19	3.23832e-13
						189.506	6.79563e-19	6.44671e-19	3.33124e-13
						189.513	7.03076e-19	6.67408e-19	3.42678e-13
						189.52	7.27391e-19	6.90938e-19	3.525e-13
						189.527	7.52536e-19	7.15285e-19	3.62599e-13
						189.535	7.78537e-19	7.4048e-19	3.72981e-13
						189.542	8.05425e-19	7.6655e-19	3.83654e-13
						189.549	8.33229e-19	7.93526e-19	3.94627e-13
						189.556	8.6198e-19	8.21438e-19	4.05908e-13
						189.563	8.91708e-19	8.50319e-19	4.17505e-13
						189.571	9.22448e-19	8.80203e-19	4.29426e-13
						189.578	9.54233e-19	9.11122e-19	4.41681e-13
						189.585	9.87098e-19	9.43113e-19	4.54279e-13
						189.592	1.02108e-18	9.76213e-19	4.6723e-13
						189.6	1.05621e-18	1.01046e-18	4.80542e-13
						189.607	1.09254e-18	1.04589e-18	4.94226e-13
						189.614	1.1301e-18	1.08255e-18	5.08292e-13
						189.621	1.16893e-18	1.12047e-18	5.2275e-13
						189.629	1.20908e-18	1.1597e-18	5.37611e-13
						189.636	1.25059e-18	1.2003e-18	5.52887e-13
						189.643	1.2935e-18	1.24229e-18	5.68588e-13
						189.65	1.33786e-18	1.28573e-18	5.84726e-13
						189.658	1.38373e-18	1.33067e-18	6.01312e-13
						189.665	1.43115e-18	1.37716e-18	6.1836e-13
						189.672	1.48016e-18	1.42525e-18	6.35882e-13
						189.679	1.53084e-18	1.475e-18	6.5389e-13
						189.687	1.58322e-18	1.52646e-18	6.72398e-13
						189.694	1.63737e-18	1.5797e-18	6.91419e-13
						189.701	1.69335e-18	1.63476e-18	7.10968e-13
						189.709	1.75121e-18	1.69172e-18	7.31058e-13
						189.716	1.81102e-18	1.75064e-18	7.51705e-13
						189.723	1.87285e-18	1.81158e-18	7.72923e-13
						189.73	1.93676e-18	1.87461e-18	7.94727e-13
						189.738	2.00282e-18	1.9398e-18	8.17135e-13
						189.745	2.0711e-18	2.00724e-18	8.40161e-13
						189.752	2.14167e-18	2.07698e-18	8.63824e-13
						189.759	2.21462e-18	2.14912e-18	8.88139e-13
						189.767	2.29001e-18	2.22373e-18	9.13125e-13
						189.774	2.36794e-18	2.30089e-18	9.38799e-13
						189.781	2.44847e-18	2.38069e-18	9.65181e-13
						189.788	2.53171e-18	2.46322e-18	9.92289e-13
						189.796	2.61774e-18	2.54858e-18	1.02014e-12
						189.803	2.70665e-18	2.63685e-18	1.04876e-12
						189.81	2.79854e-18	2.72814e-18	1.07817e-12
						189.817	2.8935e-18	2.82254e-18	1.10838e-12
						189.825	2.99164e-18	2.92017e-18	1.13943e-12
						189.832	3.09306e-18	3.02113e-18	1.17132e-12
						189.839	3.19787e-18	3.12553e-18	1.20409e-12
						189.846	3.30618e-18	3.23349e-18	1.23776e-12
						189.854	3.41811e-18	3.34512e-18	1.27235e-12
						189.861	3.53377e-18	3.46056e-18	1.30789e-12
						189.868	3.65329e-18	3.57992e-18	1.3444e-12
						189.876	3.77679e-18	3.70335e-18	1.3819e-12
						189.883	3.90441e-18	3.83097e-18	1.42043e-12
						189.89	4.03628e-18	3.96293e-18	1.46002e-12
						189.897	4.17254e-18	4.09938e-18	1.50068e-12
						189.905	4.31333e-18	4.24045e-18	1.54246e-12
						189.912	4.4588e-18	4.38632e-18	1.58537e-12
						189.919	4.60911e-18	4.53713e-18	1.62945e-12
						189.926	4.76441e-18	4.69305e-18	1.67473e-12
						189.934	4.92487e-18	4.85426e-18	1.72125e-12
						189.941	5.09066e-18	5.02093e-18	1.76903e-12
						189.948	5.26195e-18	5.19324e-18	1.81811e-12
						189.956	5.43891e-18	5.37139e-18	1.86852e-12
						189.963	5.62175e-18	5.55556e-18	1.9203e-12
						189.97	5.81064e-18	5.74595e-18	1.97348e-12
						189.977	6.00578e-18	5.94279e-18	2.02811e-12
						189.985	6.20738e-18	6.14626e-18	2.08422e-12
						189.992	6.41565e-18	6.35661e-18	2.14184e-12
						189.999	6.63081e-18	6.57406e-18	2.20103e-12
						190.007	6.85307e-18	6.79884e-18	2.26182e-12
						190.014	7.08268e-18	7.0312e-18	2.32425e-12
						190.021	7.31987e-18	7.27139e-18	2.38837e-12
						190.028	7.56489e-18	7.51967e-18	2.45423e-12
						190.036	7.81798e-18	7.7763e-18	2.52185e-12
						190.043	8.07943e-18	8.04158e-18	2.59131e-12
						190.05	8.34948e-18	8.31577e-18	2.66263e-12
						190.057	8.62843e-18	8.59918e-18	2.73588e-12
						190.065	8.91657e-18	8.89212e-18	2.8111e-12
						190.072	9.21418e-18	9.19489e-18	2.88835e-12
						190.079	9.52158e-18	9.50783e-18	2.96767e-12
						190.087	9.83908e-18	9.83126e-18	3.04912e-12
						190.094	1.0167e-17	1.01655e-17	3.13276e-12
						190.101	1.05057e-17	1.0511e-17	3.21865e-12
						190.108	1.08555e-17	1.08681e-17	3.30684e-12
						190.116	1.12168e-17	1.12371e-17	3.3974e-12
						190.123	1.159e-17	1.16185e-17	3.49039e-12
						190.13	1.19754e-17	1.20126e-17	3.58586e-12
						190.138	1.23734e-17	1.24199e-17	3.68389e-12
						190.145	1.27844e-17	1.28409e-17	3.78455e-12
						190.152	1.32089e-17	1.32759e-17	3.88789e-12
						190.16	1.36472e-17	1.37254e-17	3.994e-12
						190.167	1.40999e-17	1.41899e-17	4.10294e-12
						190.174	1.45674e-17	1.46699e-17	4.21479e-12
						190.181	1.50502e-17	1.51659e-17	4.32962e-12
						190.189	1.55487e-17	1.56785e-17	4.44751e-12
						190.196	1.60635e-17	1.62081e-17	4.56855e-12
						190.203	1.65951e-17	1.67554e-17	4.6928e-12
						190.211	1.7144e-17	1.73208e-17	4.82037e-12
						190.218	1.77108e-17	1.79051e-17	4.95132e-12
						190.225	1.8296e-17	1.85088e-17	5.08576e-12
						190.232	1.89003e-17	1.91326e-17	5.22377e-12
						190.24	1.95243e-17	1.97771e-17	5.36544e-12
						190.247	2.01685e-17	2.0443e-17	5.51087e-12
						190.254	2.08337e-17	2.1131e-17	5.66015e-12
						190.262	2.15205e-17	2.18418e-17	5.8134e-12
						190.269	2.22296e-17	2.25761e-17	5.9707e-12
						190.276	2.29617e-17	2.33348e-17	6.13216e-12
						190.284	2.37175e-17	2.41186e-17	6.2979e-12
						190.291	2.44979e-17	2.49284e-17	6.46801e-12
						190.298	2.53035e-17	2.5765e-17	6.64263e-12
						190.305	2.61352e-17	2.66292e-17	6.82185e-12
						190.313	2.69939e-17	2.7522e-17	7.0058e-12
						190.32	2.78803e-17	2.84443e-17	7.1946e-12
						190.327	2.87955e-17	2.93971e-17	7.38838e-12
						190.335	2.97401e-17	3.03813e-17	7.58727e-12
						190.342	3.07154e-17	3.1398e-17	7.79139e-12
						190.349	3.17221e-17	3.24482e-17	8.00088e-12
						190.357	3.27612e-17	3.3533e-17	8.21588e-12
						190.364	3.3834e-17	3.46536e-17	8.43653e-12
						190.371	3.49413e-17	3.5811e-17	8.66297e-12
						190.379	3.60843e-17	3.70066e-17	8.89536e-12
						190.386	3.72641e-17	3.82414e-17	9.13384e-12
						190.393	3.84819e-17	3.95169e-17	9.37858e-12
						190.4	3.97389e-17	4.08343e-17	9.62972e-12
						190.408	4.10363e-17	4.2195e-17	9.88745e-12
						190.415	4.23754e-17	4.36003e-17	1.01519e-11
						190.422	4.37575e-17	4.50517e-17	1.04233e-11
						190.43	4.51841e-17	4.65508e-17	1.07018e-11
						190.437	4.66564e-17	4.8099e-17	1.09875e-11
						190.444	4.8176e-17	4.96979e-17	1.12807e-11
						190.452	4.97443e-17	5.13492e-17	1.15816e-11
						190.459	5.13628e-17	5.30546e-17	1.18903e-11
						190.466	5.30332e-17	5.48157e-17	1.2207e-11
						190.474	5.47571e-17	5.66345e-17	1.2532e-11
						190.481	5.65362e-17	5.85127e-17	1.28655e-11
						190.488	5.83722e-17	6.04523e-17	1.32076e-11
						190.496	6.02668e-17	6.24551e-17	1.35586e-11
						190.503	6.2222e-17	6.45234e-17	1.39188e-11
						190.51	6.42397e-17	6.66592e-17	1.42883e-11
						190.517	6.63218e-17	6.88645e-17	1.46673e-11
						190.525	6.84703e-17	7.11418e-17	1.50562e-11
						190.532	7.06873e-17	7.34932e-17	1.54552e-11
						190.539	7.2975e-17	7.59212e-17	1.58645e-11
						190.547	7.53355e-17	7.84283e-17	1.62844e-11
						190.554	7.77713e-17	8.10168e-17	1.67152e-11
						190.561	8.02845e-17	8.36895e-17	1.71571e-11
						190.569	8.28777e-17	8.64491e-17	1.76104e-11
						190.576	8.55534e-17	8.92983e-17	1.80755e-11
						190.583	8.8314e-17	9.224e-17	1.85525e-11
						190.591	9.11624e-17	9.52771e-17	1.90418e-11
						190.598	9.41012e-17	9.84127e-17	1.95438e-11
						190.605	9.71332e-17	1.0165e-16	2.00586e-11
						190.613	1.00261e-16	1.04992e-16	2.05868e-11
						190.62	1.03489e-16	1.08443e-16	2.11285e-11
						190.627	1.06818e-16	1.12005e-16	2.16841e-11
						190.635	1.10253e-16	1.15682e-16	2.2254e-11
						190.642	1.13797e-16	1.19478e-16	2.28385e-11
						190.649	1.17453e-16	1.23397e-16	2.34381e-11
						190.657	1.21224e-16	1.27442e-16	2.4053e-11
						190.664	1.25115e-16	1.31619e-16	2.46837e-11
						190.671	1.29129e-16	1.35929e-16	2.53305e-11
						190.679	1.33269e-16	1.40379e-16	2.59939e-11
						190.686	1.3754e-16	1.44973e-16	2.66743e-11
						190.693	1.41945e-16	1.49714e-16	2.7372e-11
						190.701	1.4649e-16	1.54608e-16	2.80876e-11
						190.708	1.51177e-16	1.5966e-16	2.88215e-11
						190.715	1.56012e-16	1.64874e-16	2.95741e-11
						190.723	1.61e-16	1.70256e-16	3.03459e-11
						190.73	1.66144e-16	1.75811e-16	3.11373e-11
						190.737	1.7145e-16	1.81544e-16	3.19489e-11
						190.745	1.76923e-16	1.87461e-16	3.27812e-11
						190.752	1.82567e-16	1.93569e-16	3.36346e-11
						190.759	1.88389e-16	1.99872e-16	3.45098e-11
						190.767	1.94394e-16	2.06377e-16	3.54072e-11
						190.774	2.00587e-16	2.13091e-16	3.63273e-11
						190.781	2.06974e-16	2.2002e-16	3.72708e-11
						190.789	2.13561e-16	2.2717e-16	3.82383e-11
						190.796	2.20354e-16	2.3455e-16	3.92303e-11
						190.803	2.2736e-16	2.42165e-16	4.02473e-11
						190.811	2.34585e-16	2.50024e-16	4.12902e-11
						190.818	2.42036e-16	2.58134e-16	4.23594e-11
						190.825	2.4972e-16	2.66503e-16	4.34557e-11
						190.833	2.57643e-16	2.75139e-16	4.45796e-11
						190.84	2.65815e-16	2.84051e-16	4.5732e-11
						190.847	2.74241e-16	2.93247e-16	4.69134e-11
						190.855	2.82929e-16	3.02736e-16	4.81246e-11
						190.862	2.91889e-16	3.12527e-16	4.93663e-11
						190.869	3.01128e-16	3.2263e-16	5.06393e-11
						190.877	3.10654e-16	3.33054e-16	5.19444e-11
						190.884	3.20477e-16	3.4381e-16	5.32823e-11
						190.891	3.30605e-16	3.54908e-16	5.46538e-11
						190.899	3.41049e-16	3.66358e-16	5.60598e-11
						190.906	3.51817e-16	3.78173e-16	5.7501e-11
						190.913	3.62919e-16	3.90362e-16	5.89785e-11
						190.921	3.74366e-16	4.02938e-16	6.0493e-11
						190.928	3.86167e-16	4.15913e-16	6.20454e-11
						190.936	3.98335e-16	4.29298e-16	6.36368e-11
						190.943	4.1088e-16	4.43108e-16	6.52679e-11
						190.95	4.23814e-16	4.57356e-16	6.69399e-11
						190.958	4.37148e-16	4.72054e-16	6.86537e-11
						190.965	4.50895e-16	4.87217e-16	7.04103e-11
						190.972	4.65066e-16	5.02859e-16	7.22107e-11
						190.98	4.79676e-16	5.18996e-16	7.4056e-11
						190.987	4.94737e-16	5.35642e-16	7.59474e-11
						190.994	5.10264e-16	5.52814e-16	7.78859e-11
						191.002	5.26269e-16	5.70528e-16	7.98727e-11
						191.009	5.42768e-16	5.888e-16	8.19089e-11
						191.016	5.59776e-16	6.07648e-16	8.39958e-11
						191.024	5.77308e-16	6.2709e-16	8.61345e-11
						191.031	5.95381e-16	6.47144e-16	8.83264e-11
						191.039	6.14009e-16	6.67829e-16	9.05727e-11
						191.046	6.3321e-16	6.89165e-16	9.28747e-11
						191.053	6.53002e-16	7.11171e-16	9.52338e-11
						191.061	6.73403e-16	7.3387e-16	9.76513e-11
						191.068	6.9443e-16	7.5728e-16	1.00129e-10
						191.075	7.16102e-16	7.81426e-16	1.02667e-10
						191.083	7.3844e-16	8.0633e-16	1.05269e-10
						191.09	7.61463e-16	8.32014e-16	1.07935e-10
						191.097	7.85191e-16	8.58504e-16	1.10666e-10
						191.105	8.09647e-16	8.85823e-16	1.13465e-10
						191.112	8.34851e-16	9.13997e-16	1.16334e-10
						191.119	8.60827e-16	9.43054e-16	1.19272e-10
						191.127	8.87598e-16	9.73019e-16	1.22283e-10
						191.134	9.15187e-16	1.00392e-15	1.25369e-10
						191.142	9.43619e-16	1.03579e-15	1.2853e-10
						191.149	9.7292e-16	1.06865e-15	1.31769e-10
						191.156	1.00311e-15	1.10254e-15	1.35088e-10
						191.164	1.03423e-15	1.13749e-15	1.38488e-10
						191.171	1.0663e-15	1.17352e-15	1.41971e-10
						191.178	1.09934e-15	1.21068e-15	1.4554e-10
						191.186	1.13339e-15	1.249e-15	1.49197e-10
						191.193	1.16847e-15	1.28851e-15	1.52942e-10
						191.201	1.20463e-15	1.32925e-15	1.5678e-10
						191.208	1.24188e-15	1.37125e-15	1.60712e-10
						191.215	1.28027e-15	1.41456e-15	1.64739e-10
						191.223	1.31982e-15	1.45922e-15	1.68865e-10
						191.23	1.36057e-15	1.50527e-15	1.73092e-10
						191.237	1.40256e-15	1.55274e-15	1.77422e-10
						191.245	1.44583e-15	1.60169e-15	1.81858e-10
						191.252	1.4904e-15	1.65215e-15	1.86401e-10
						191.26	1.53633e-15	1.70418e-15	1.91055e-10
						191.267	1.58364e-15	1.75782e-15	1.95823e-10
						191.274	1.63239e-15	1.81312e-15	2.00706e-10
						191.282	1.68262e-15	1.87013e-15	2.05709e-10
						191.289	1.73436e-15	1.9289e-15	2.10832e-10
						191.296	1.78767e-15	1.9895e-15	2.1608e-10
						191.304	1.84258e-15	2.05196e-15	2.21455e-10
						191.311	1.89916e-15	2.11635e-15	2.26961e-10
						191.319	1.95744e-15	2.18273e-15	2.326e-10
						191.326	2.01748e-15	2.25116e-15	2.38376e-10
						191.333	2.07933e-15	2.3217e-15	2.44291e-10
						191.341	2.14304e-15	2.39441e-15	2.50349e-10
						191.348	2.20867e-15	2.46936e-15	2.56554e-10
						191.355	2.27628e-15	2.54662e-15	2.62908e-10
						191.363	2.34592e-15	2.62625e-15	2.69416e-10
						191.37	2.41766e-15	2.70833e-15	2.76081e-10
						191.378	2.49154e-15	2.79294e-15	2.82906e-10
						191.385	2.56765e-15	2.88015e-15	2.89896e-10
						191.392	2.64604e-15	2.97003e-15	2.97054e-10
						191.4	2.72679e-15	3.06267e-15	3.04384e-10
						191.407	2.80995e-15	3.15816e-15	3.11891e-10
						191.415	2.89561e-15	3.25657e-15	3.19578e-10
						191.422	2.98383e-15	3.35799e-15	3.27449e-10
						191.429	3.0747e-15	3.46252e-15	3.35509e-10
						191.437	3.16828e-15	3.57025e-15	3.43762e-10
						191.444	3.26466e-15	3.68128e-15	3.52213e-10
						191.452	3.36392e-15	3.7957e-15	3.60867e-10
						191.459	3.46614e-15	3.91362e-15	3.69727e-10
						191.466	3.57142e-15	4.03514e-15	3.788e-10
						191.474	3.67984e-15	4.16037e-15	3.88089e-10
						191.481	3.79149e-15	4.28942e-15	3.976e-10
						191.488	3.90647e-15	4.42241e-15	4.07338e-10
						191.496	4.02488e-15	4.55945e-15	4.17308e-10
						191.503	4.14681e-15	4.70067e-15	4.27516e-10
						191.511	4.27237e-15	4.84618e-15	4.37967e-10
						191.518	4.40166e-15	4.99613e-15	4.48666e-10
						191.525	4.5348e-15	5.15063e-15	4.5962e-10
						191.533	4.67189e-15	5.30983e-15	4.70835e-10
						191.54	4.81306e-15	5.47387e-15	4.82316e-10
						191.548	4.95841e-15	5.64289e-15	4.94069e-10
						191.555	5.10807e-15	5.81704e-15	5.06102e-10
						191.562	5.26217e-15	5.99648e-15	5.18419e-10
						191.57	5.42084e-15	6.18135e-15	5.31029e-10
						191.577	5.58421e-15	6.37183e-15	5.43937e-10
						191.585	5.75241e-15	6.56808e-15	5.5715e-10
						191.592	5.92559e-15	6.77027e-15	5.70676e-10
						191.599	6.10389e-15	6.97857e-15	5.84521e-10
						191.607	6.28745e-15	7.19318e-15	5.98693e-10
						191.614	6.47644e-15	7.41427e-15	6.132e-10
						191.622	6.67101e-15	7.64204e-15	6.28049e-10
						191.629	6.87132e-15	7.87669e-15	6.43248e-10
						191.636	7.07753e-15	8.11842e-15	6.58804e-10
						191.644	7.28982e-15	8.36744e-15	6.74727e-10
						191.651	7.50837e-15	8.62396e-15	6.91024e-10
						191.659	7.73334e-15	8.88822e-15	7.07705e-10
						191.666	7.96494e-15	9.16043e-15	7.24777e-10
						191.673	8.20335e-15	9.44084e-15	7.4225e-10
						191.681	8.44876e-15	9.72968e-15	7.60133e-10
						191.688	8.70138e-15	1.00272e-14	7.78434e-10
						191.696	8.96142e-15	1.03337e-14	7.97165e-10
						191.703	9.22909e-15	1.06493e-14	8.16334e-10
						191.711	9.50461e-15	1.09745e-14	8.35951e-10
						191.718	9.78821e-15	1.13094e-14	8.56028e-10
						191.725	1.00801e-14	1.16543e-14	8.76573e-10
						191.733	1.03806e-14	1.20096e-14	8.97597e-10
						191.74	1.06898e-14	1.23756e-14	9.19113e-10
						191.748	1.10081e-14	1.27524e-14	9.4113e-10
						191.755	1.13357e-14	1.31406e-14	9.6366e-10
						191.762	1.16728e-14	1.35404e-14	9.86714e-10
						191.77	1.20198e-14	1.39521e-14	1.0103e-09
						191.777	1.2377e-14	1.43761e-14	1.03444e-09
						191.785	1.27445e-14	1.48128e-14	1.05914e-09
						191.792	1.31228e-14	1.52625e-14	1.08442e-09
						191.8	1.35121e-14	1.57256e-14	1.11028e-09
						191.807	1.39127e-14	1.62025e-14	1.13674e-09
						191.814	1.4325e-14	1.66937e-14	1.16381e-09
						191.822	1.47492e-14	1.71994e-14	1.19151e-09
						191.829	1.51858e-14	1.77202e-14	1.21985e-09
						191.837	1.56351e-14	1.82566e-14	1.24885e-09
						191.844	1.60974e-14	1.88088e-14	1.27852e-09
						191.851	1.65732e-14	1.93775e-14	1.30887e-09
						191.859	1.70627e-14	1.9963e-14	1.33992e-09
						191.866	1.75665e-14	2.0566e-14	1.37169e-09
						191.874	1.80848e-14	2.11868e-14	1.40419e-09
						191.881	1.86182e-14	2.1826e-14	1.43744e-09
						191.889	1.9167e-14	2.24842e-14	1.47146e-09
						191.896	1.97316e-14	2.31619e-14	1.50625e-09
						191.903	2.03126e-14	2.38596e-14	1.54185e-09
						191.911	2.09104e-14	2.4578e-14	1.57827e-09
						191.918	2.15254e-14	2.53176e-14	1.61552e-09
						191.926	2.21582e-14	2.60791e-14	1.65362e-09
						191.933	2.28093e-14	2.68631e-14	1.6926e-09
						191.941	2.34791e-14	2.76702e-14	1.73247e-09
						191.948	2.41682e-14	2.85011e-14	1.77326e-09
						191.955	2.48772e-14	2.93566e-14	1.81497e-09
						191.963	2.56065e-14	3.02372e-14	1.85765e-09
						191.97	2.63569e-14	3.11438e-14	1.90129e-09
						191.978	2.71288e-14	3.20772e-14	1.94593e-09
						191.985	2.79229e-14	3.30379e-14	1.99159e-09
						191.993	2.87398e-14	3.4027e-14	2.0383e-09
						192	2.95802e-14	3.50451e-14	2.08606e-09
						192.007	3.04446e-14	3.60931e-14	2.13491e-09
						192.015	3.13339e-14	3.71719e-14	2.18488e-09
						192.022	3.22486e-14	3.82823e-14	2.23598e-09
						192.03	3.31895e-14	3.94253e-14	2.28824e-09
						192.037	3.41574e-14	4.06019e-14	2.34169e-09
						192.045	3.51529e-14	4.18129e-14	2.39635e-09
						192.052	3.61769e-14	4.30594e-14	2.45225e-09
						192.059	3.72302e-14	4.43423e-14	2.50942e-09
						192.067	3.83136e-14	4.56628e-14	2.56788e-09
						192.074	3.94279e-14	4.70219e-14	2.62766e-09
						192.082	4.05739e-14	4.84207e-14	2.6888e-09
						192.089	4.17527e-14	4.98604e-14	2.75131e-09
						192.097	4.2965e-14	5.13421e-14	2.81524e-09
						192.104	4.42118e-14	5.2867e-14	2.88061e-09
						192.112	4.54942e-14	5.44364e-14	2.94746e-09
						192.119	4.6813e-14	5.60515e-14	3.01581e-09
						192.126	4.81693e-14	5.77137e-14	3.0857e-09
						192.134	4.95642e-14	5.94243e-14	3.15716e-09
						192.141	5.09987e-14	6.11846e-14	3.23023e-09
						192.149	5.24739e-14	6.29961e-14	3.30494e-09
						192.156	5.39909e-14	6.48603e-14	3.38133e-09
						192.164	5.5551e-14	6.67786e-14	3.45943e-09
						192.171	5.71552e-14	6.87526e-14	3.53929e-09
						192.179	5.88049e-14	7.07838e-14	3.62093e-09
						192.186	6.05013e-14	7.2874e-14	3.7044e-09
						192.193	6.22457e-14	7.50248e-14	3.78974e-09
						192.201	6.40394e-14	7.72379e-14	3.87699e-09
						192.208	6.58838e-14	7.9515e-14	3.96618e-09
						192.216	6.77802e-14	8.1858e-14	4.05737e-09
						192.223	6.97302e-14	8.42688e-14	4.15059e-09
						192.231	7.17352e-14	8.67493e-14	4.2459e-09
						192.238	7.37967e-14	8.93014e-14	4.34332e-09
						192.246	7.59163e-14	9.19272e-14	4.44292e-09
						192.253	7.80956e-14	9.46288e-14	4.54473e-09
						192.261	8.03362e-14	9.74083e-14	4.6488e-09
						192.268	8.26399e-14	1.00268e-13	4.75519e-09
						192.275	8.50083e-14	1.0321e-13	4.86394e-09
						192.283	8.74433e-14	1.06237e-13	4.9751e-09
						192.29	8.99466e-14	1.0935e-13	5.08873e-09
						192.298	9.25202e-14	1.12554e-13	5.20487e-09
						192.305	9.5166e-14	1.15849e-13	5.32359e-09
						192.313	9.78859e-14	1.19239e-13	5.44493e-09
						192.32	1.00682e-13	1.22727e-13	5.56895e-09
						192.328	1.03556e-13	1.26314e-13	5.69572e-09
						192.335	1.06511e-13	1.30005e-13	5.82529e-09
						192.343	1.09549e-13	1.33801e-13	5.95771e-09
						192.35	1.12671e-13	1.37706e-13	6.09305e-09
						192.357	1.15881e-13	1.41723e-13	6.23138e-09
						192.365	1.1918e-13	1.45855e-13	6.37275e-09
						192.372	1.22572e-13	1.50105e-13	6.51723e-09
						192.38	1.26058e-13	1.54476e-13	6.66489e-09
						192.387	1.29641e-13	1.58972e-13	6.81579e-09
						192.395	1.33324e-13	1.63597e-13	6.97e-09
						192.402	1.37109e-13	1.68354e-13	7.1276e-09
						192.41	1.41e-13	1.73246e-13	7.28865e-09
						192.417	1.44999e-13	1.78278e-13	7.45323e-09
						192.425	1.49109e-13	1.83453e-13	7.62142e-09
						192.432	1.53333e-13	1.88776e-13	7.79328e-09
						192.44	1.57675e-13	1.9425e-13	7.9689e-09
						192.447	1.62137e-13	1.99879e-13	8.14836e-09
						192.454	1.66723e-13	2.05669e-13	8.33173e-09
						192.462	1.71436e-13	2.11624e-13	8.51911e-09
						192.469	1.76279e-13	2.17747e-13	8.71057e-09
						192.477	1.81257e-13	2.24044e-13	8.9062e-09
						192.484	1.86372e-13	2.3052e-13	9.10608e-09
						192.492	1.91628e-13	2.37179e-13	9.31032e-09
						192.499	1.9703e-13	2.44027e-13	9.519e-09
						192.507	2.02581e-13	2.51069e-13	9.7322e-09
						192.514	2.08286e-13	2.5831e-13	9.95004e-09
						192.522	2.14147e-13	2.65756e-13	1.01726e-08
						192.529	2.20171e-13	2.73413e-13	1.04e-08
						192.537	2.2636e-13	2.81286e-13	1.06323e-08
						192.544	2.3272e-13	2.89381e-13	1.08696e-08
						192.552	2.39254e-13	2.97704e-13	1.11121e-08
						192.559	2.45969e-13	3.06263e-13	1.13598e-08
						192.567	2.52868e-13	3.15063e-13	1.16129e-08
						192.574	2.59957e-13	3.2411e-13	1.18714e-08
						192.582	2.6724e-13	3.33412e-13	1.21355e-08
						192.589	2.74723e-13	3.42977e-13	1.24053e-08
						192.596	2.82411e-13	3.5281e-13	1.26809e-08
						192.604	2.90311e-13	3.62919e-13	1.29624e-08
						192.611	2.98426e-13	3.73313e-13	1.325e-08
						192.619	3.06764e-13	3.83998e-13	1.35437e-08
						192.626	3.1533e-13	3.94983e-13	1.38438e-08
						192.634	3.2413e-13	4.06277e-13	1.41503e-08
						192.641	3.33171e-13	4.17887e-13	1.44634e-08
						192.649	3.42458e-13	4.29822e-13	1.47832e-08
						192.656	3.52e-13	4.42091e-13	1.51098e-08
						192.664	3.61801e-13	4.54704e-13	1.54434e-08
						192.671	3.7187e-13	4.67669e-13	1.57842e-08
						192.679	3.82213e-13	4.80997e-13	1.61322e-08
						192.686	3.92838e-13	4.94697e-13	1.64877e-08
						192.694	4.03752e-13	5.0878e-13	1.68507e-08
						192.701	4.14963e-13	5.23256e-13	1.72215e-08
						192.709	4.26479e-13	5.38135e-13	1.76002e-08
						192.716	4.38308e-13	5.53429e-13	1.79869e-08
						192.724	4.50458e-13	5.69149e-13	1.83819e-08
						192.731	4.62938e-13	5.85307e-13	1.87852e-08
						192.739	4.75756e-13	6.01915e-13	1.91971e-08
						192.746	4.88922e-13	6.18984e-13	1.96178e-08
						192.754	5.02444e-13	6.36527e-13	2.00474e-08
						192.761	5.16333e-13	6.54558e-13	2.04861e-08
						192.769	5.30597e-13	6.7309e-13	2.09341e-08
						192.776	5.45248e-13	6.92136e-13	2.13915e-08
						192.784	5.60294e-13	7.1171e-13	2.18587e-08
						192.791	5.75747e-13	7.31826e-13	2.23357e-08
						192.799	5.91617e-13	7.52499e-13	2.28228e-08
						192.806	6.07915e-13	7.73745e-13	2.33201e-08
						192.814	6.24652e-13	7.95579e-13	2.3828e-08
						192.821	6.41841e-13	8.18016e-13	2.43465e-08
						192.829	6.59493e-13	8.41074e-13	2.4876e-08
						192.836	6.77619e-13	8.64768e-13	2.54166e-08
						192.844	6.96234e-13	8.89116e-13	2.59685e-08
						192.851	7.15349e-13	9.14136e-13	2.65321e-08
						192.859	7.34977e-13	9.39846e-13	2.71074e-08
						192.866	7.55133e-13	9.66265e-13	2.76949e-08
						192.874	7.7583e-13	9.93411e-13	2.82947e-08
						192.881	7.97082e-13	1.0213e-12	2.8907e-08
						192.889	8.18903e-13	1.04996e-12	2.95321e-08
						192.896	8.41309e-13	1.07941e-12	3.01703e-08
						192.904	8.64315e-13	1.10967e-12	3.08219e-08
						192.911	8.87937e-13	1.14076e-12	3.1487e-08
						192.919	9.1219e-13	1.1727e-12	3.21661e-08
						192.926	9.37092e-13	1.20552e-12	3.28593e-08
						192.934	9.62659e-13	1.23924e-12	3.35669e-08
						192.941	9.88908e-13	1.27388e-12	3.42893e-08
						192.949	1.01586e-12	1.30947e-12	3.50267e-08
						192.956	1.04353e-12	1.34603e-12	3.57794e-08
						192.964	1.07193e-12	1.38359e-12	3.65477e-08
						192.971	1.10109e-12	1.42218e-12	3.73321e-08
						192.979	1.13103e-12	1.46183e-12	3.81326e-08
						192.986	1.16177e-12	1.50256e-12	3.89498e-08
						192.994	1.19332e-12	1.54439e-12	3.97839e-08
						193.001	1.22571e-12	1.58737e-12	4.06353e-08
						193.009	1.25896e-12	1.63153e-12	4.15042e-08
						193.016	1.29309e-12	1.67688e-12	4.23911e-08
						193.024	1.32813e-12	1.72347e-12	4.32964e-08
						193.031	1.3641e-12	1.77132e-12	4.42203e-08
						193.039	1.40101e-12	1.82048e-12	4.51633e-08
						193.046	1.43891e-12	1.87097e-12	4.61257e-08
						193.054	1.47781e-12	1.92284e-12	4.71079e-08
						193.061	1.51774e-12	1.97611e-12	4.81103e-08
						193.069	1.55872e-12	2.03083e-12	4.91333e-08
						193.076	1.60079e-12	2.08703e-12	5.01773e-08
						193.084	1.64396e-12	2.14475e-12	5.12428e-08
						193.091	1.68828e-12	2.20404e-12	5.23301e-08
						193.099	1.73376e-12	2.26493e-12	5.34397e-08
						193.106	1.78044e-12	2.32747e-12	5.4572e-08
						193.114	1.82835e-12	2.3917e-12	5.57275e-08
						193.121	1.87752e-12	2.45767e-12	5.69066e-08
						193.129	1.92798e-12	2.52542e-12	5.81098e-08
						193.137	1.97978e-12	2.59499e-12	5.93376e-08
						193.144	2.03293e-12	2.66644e-12	6.05904e-08
						193.152	2.08747e-12	2.73982e-12	6.18688e-08
						193.159	2.14345e-12	2.81518e-12	6.31732e-08
						193.167	2.20089e-12	2.89256e-12	6.45042e-08
						193.174	2.25984e-12	2.97202e-12	6.58622e-08
						193.182	2.32034e-12	3.05363e-12	6.72479e-08
						193.189	2.38242e-12	3.13742e-12	6.86616e-08
						193.197	2.44612e-12	3.22347e-12	7.01041e-08
						193.204	2.51148e-12	3.31183e-12	7.15758e-08
						193.212	2.57856e-12	3.40255e-12	7.30773e-08
						193.219	2.64738e-12	3.49571e-12	7.46093e-08
						193.227	2.718e-12	3.59137e-12	7.61722e-08
						193.234	2.79046e-12	3.68959e-12	7.77668e-08
						193.242	2.86482e-12	3.79043e-12	7.93935e-08
						193.249	2.9411e-12	3.89398e-12	8.10531e-08
						193.257	3.01938e-12	4.00029e-12	8.27461e-08
						193.264	3.09969e-12	4.10944e-12	8.44733e-08
						193.272	3.18208e-12	4.22151e-12	8.62353e-08
						193.28	3.26662e-12	4.33657e-12	8.80327e-08
						193.287	3.35335e-12	4.4547e-12	8.98662e-08
						193.295	3.44234e-12	4.57598e-12	9.17366e-08
						193.302	3.53363e-12	4.70048e-12	9.36446e-08
						193.31	3.62729e-12	4.82831e-12	9.55908e-08
						193.317	3.72337e-12	4.95953e-12	9.75761e-08
						193.325	3.82194e-12	5.09424e-12	9.96011e-08
						193.332	3.92306e-12	5.23254e-12	1.01667e-07
						193.34	4.0268e-12	5.3745e-12	1.03774e-07
						193.347	4.13322e-12	5.52024e-12	1.05922e-07
						193.355	4.24238e-12	5.66984e-12	1.08114e-07
						193.362	4.35436e-12	5.82341e-12	1.1035e-07
						193.37	4.46923e-12	5.98104e-12	1.1263e-07
						193.378	4.58706e-12	6.14286e-12	1.14956e-07
						193.385	4.70793e-12	6.30895e-12	1.17328e-07
						193.393	4.83191e-12	6.47944e-12	1.19747e-07
						193.4	4.95908e-12	6.65443e-12	1.22214e-07
						193.408	5.08951e-12	6.83405e-12	1.2473e-07
						193.415	5.2233e-12	7.01841e-12	1.27296e-07
						193.423	5.36053e-12	7.20764e-12	1.29913e-07
						193.43	5.50128e-12	7.40185e-12	1.32582e-07
						193.438	5.64563e-12	7.60119e-12	1.35304e-07
						193.445	5.79369e-12	7.80577e-12	1.38079e-07
						193.453	5.94554e-12	8.01575e-12	1.4091e-07
						193.46	6.10128e-12	8.23124e-12	1.43796e-07
						193.468	6.261e-12	8.4524e-12	1.4674e-07
						193.476	6.42481e-12	8.67938e-12	1.49741e-07
						193.483	6.59281e-12	8.91231e-12	1.52802e-07
						193.491	6.76509e-12	9.15136e-12	1.55922e-07
						193.498	6.94177e-12	9.39667e-12	1.59105e-07
						193.506	7.12296e-12	9.64842e-12	1.62349e-07
						193.513	7.30877e-12	9.90677e-12	1.65658e-07
						193.521	7.49931e-12	1.01719e-11	1.69031e-07
						193.528	7.6947e-12	1.04439e-11	1.72471e-07
						193.536	7.89506e-12	1.07231e-11	1.75978e-07
						193.544	8.10052e-12	1.10095e-11	1.79554e-07
						193.551	8.3112e-12	1.13035e-11	1.832e-07
						193.559	8.52723e-12	1.16051e-11	1.86917e-07
						193.566	8.74874e-12	1.19146e-11	1.90706e-07
						193.574	8.97587e-12	1.22321e-11	1.9457e-07
						193.581	9.20876e-12	1.25579e-11	1.98509e-07
						193.589	9.44755e-12	1.28923e-11	2.02525e-07
						193.596	9.69239e-12	1.32353e-11	2.06619e-07
						193.604	9.94342e-12	1.35872e-11	2.10792e-07
						193.612	1.02008e-11	1.39483e-11	2.15047e-07
						193.619	1.04647e-11	1.43187e-11	2.19385e-07
						193.627	1.07352e-11	1.46988e-11	2.23806e-07
						193.634	1.10126e-11	1.50888e-11	2.28314e-07
						193.642	1.1297e-11	1.54888e-11	2.32909e-07
						193.649	1.15885e-11	1.58992e-11	2.37593e-07
						193.657	1.18874e-11	1.63203e-11	2.42367e-07
						193.664	1.21938e-11	1.67522e-11	2.47234e-07
						193.672	1.25079e-11	1.71954e-11	2.52195e-07
						193.68	1.28299e-11	1.76499e-11	2.57252e-07
						193.687	1.316e-11	1.81163e-11	2.62406e-07
						193.695	1.34984e-11	1.85946e-11	2.6766e-07
						193.702	1.38453e-11	1.90854e-11	2.73015e-07
						193.71	1.42009e-11	1.95887e-11	2.78473e-07
						193.717	1.45654e-11	2.01051e-11	2.84035e-07
						193.725	1.4939e-11	2.06347e-11	2.89705e-07
						193.733	1.5322e-11	2.1178e-11	2.95484e-07
						193.74	1.57146e-11	2.17352e-11	3.01373e-07
						193.748	1.6117e-11	2.23068e-11	3.07376e-07
						193.755	1.65294e-11	2.28931e-11	3.13493e-07
						193.763	1.69521e-11	2.34944e-11	3.19728e-07
						193.77	1.73854e-11	2.41112e-11	3.26082e-07
						193.778	1.78295e-11	2.47438e-11	3.32557e-07
						193.786	1.82847e-11	2.53926e-11	3.39156e-07
						193.793	1.87512e-11	2.6058e-11	3.4588e-07
						193.801	1.92293e-11	2.67404e-11	3.52733e-07
						193.808	1.97193e-11	2.74403e-11	3.59717e-07
						193.816	2.02215e-11	2.81581e-11	3.66833e-07
						193.823	2.07361e-11	2.88943e-11	3.74085e-07
						193.831	2.12636e-11	2.96493e-11	3.81474e-07
						193.839	2.18041e-11	3.04235e-11	3.89004e-07
						193.846	2.2358e-11	3.12175e-11	3.96676e-07
						193.854	2.29257e-11	3.20317e-11	4.04494e-07
						193.861	2.35074e-11	3.28666e-11	4.12461e-07
						193.869	2.41035e-11	3.37228e-11	4.20578e-07
						193.876	2.47144e-11	3.46008e-11	4.28848e-07
						193.884	2.53403e-11	3.55012e-11	4.37275e-07
						193.892	2.59817e-11	3.64244e-11	4.4586e-07
						193.899	2.6639e-11	3.7371e-11	4.54608e-07
						193.907	2.73124e-11	3.83417e-11	4.63521e-07
						193.914	2.80025e-11	3.93371e-11	4.72601e-07
						193.922	2.87096e-11	4.03576e-11	4.81853e-07
						193.93	2.94341e-11	4.1404e-11	4.91278e-07
						193.937	3.01764e-11	4.24769e-11	5.0088e-07
						193.945	3.0937e-11	4.35769e-11	5.10663e-07
						193.952	3.17162e-11	4.47048e-11	5.20629e-07
						193.96	3.25146e-11	4.58612e-11	5.30782e-07
						193.967	3.33326e-11	4.70468e-11	5.41125e-07
						193.975	3.41707e-11	4.82623e-11	5.51662e-07
						193.983	3.50293e-11	4.95084e-11	5.62396e-07
						193.99	3.5909e-11	5.0786e-11	5.7333e-07
						193.998	3.68101e-11	5.20958e-11	5.84468e-07
						194.005	3.77334e-11	5.34385e-11	5.95814e-07
						194.013	3.86792e-11	5.48151e-11	6.07372e-07
						194.021	3.96481e-11	5.62262e-11	6.19144e-07
						194.028	4.06407e-11	5.76728e-11	6.31136e-07
						194.036	4.16575e-11	5.91558e-11	6.43351e-07
						194.043	4.26991e-11	6.0676e-11	6.55792e-07
						194.051	4.3766e-11	6.22343e-11	6.68465e-07
						194.059	4.4859e-11	6.38317e-11	6.81372e-07
						194.066	4.59786e-11	6.54691e-11	6.94519e-07
						194.074	4.71254e-11	6.71475e-11	7.07909e-07
						194.081	4.83001e-11	6.88679e-11	7.21547e-07
						194.089	4.95033e-11	7.06313e-11	7.35436e-07
						194.097	5.07357e-11	7.24388e-11	7.49583e-07
						194.104	5.19981e-11	7.42914e-11	7.6399e-07
						194.112	5.3291e-11	7.61903e-11	7.78663e-07
						194.119	5.46153e-11	7.81365e-11	7.93606e-07
						194.127	5.59717e-11	8.01313e-11	8.08824e-07
						194.135	5.73608e-11	8.21758e-11	8.24323e-07
						194.142	5.87836e-11	8.42711e-11	8.40106e-07
						194.15	6.02407e-11	8.64186e-11	8.56179e-07
						194.157	6.17331e-11	8.86195e-11	8.72546e-07
						194.165	6.32615e-11	9.08751e-11	8.89214e-07
						194.173	6.48267e-11	9.31867e-11	9.06187e-07
						194.18	6.64297e-11	9.55557e-11	9.23471e-07
						194.188	6.80712e-11	9.79835e-11	9.4107e-07
						194.195	6.97523e-11	1.00471e-10	9.58992e-07
						194.203	7.14739e-11	1.03021e-10	9.7724e-07
						194.211	7.32368e-11	1.05634e-10	9.95821e-07
						194.218	7.50421e-11	1.08311e-10	1.01474e-06
						194.226	7.68907e-11	1.11055e-10	1.03401e-06
						194.233	7.87838e-11	1.13866e-10	1.05362e-06
						194.241	8.07221e-11	1.16747e-10	1.07359e-06
						194.249	8.2707e-11	1.19698e-10	1.09393e-06
						194.256	8.47394e-11	1.22723e-10	1.11463e-06
						194.264	8.68204e-11	1.25822e-10	1.13571e-06
						194.271	8.89512e-11	1.28998e-10	1.15717e-06
						194.279	9.11329e-11	1.32252e-10	1.17902e-06
						194.287	9.33668e-11	1.35585e-10	1.20126e-06
						194.294	9.56539e-11	1.39001e-10	1.22391e-06
						194.302	9.79957e-11	1.42501e-10	1.24696e-06
						194.309	1.00393e-10	1.46086e-10	1.27044e-06
						194.317	1.02848e-10	1.4976e-10	1.29433e-06
						194.325	1.05361e-10	1.53523e-10	1.31866e-06
						194.332	1.07934e-10	1.57379e-10	1.34342e-06
						194.34	1.10568e-10	1.6133e-10	1.36863e-06
						194.348	1.13265e-10	1.65377e-10	1.39429e-06
						194.355	1.16025e-10	1.69523e-10	1.42041e-06
						194.363	1.18852e-10	1.7377e-10	1.447e-06
						194.37	1.21745e-10	1.78121e-10	1.47406e-06
						194.378	1.24707e-10	1.82579e-10	1.50162e-06
						194.386	1.27739e-10	1.87145e-10	1.52966e-06
						194.393	1.30842e-10	1.91822e-10	1.55821e-06
						194.401	1.34019e-10	1.96614e-10	1.58726e-06
						194.408	1.37272e-10	2.01522e-10	1.61683e-06
						194.416	1.40601e-10	2.06549e-10	1.64694e-06
						194.424	1.44008e-10	2.11699e-10	1.67757e-06
						194.431	1.47496e-10	2.16974e-10	1.70876e-06
						194.439	1.51066e-10	2.22377e-10	1.74049e-06
						194.447	1.54721e-10	2.27912e-10	1.77279e-06
						194.454	1.58461e-10	2.3358e-10	1.80567e-06
						194.462	1.62289e-10	2.39386e-10	1.83913e-06
						194.469	1.66208e-10	2.45333e-10	1.87318e-06
						194.477	1.70218e-10	2.51424e-10	1.90783e-06
						194.485	1.74323e-10	2.57662e-10	1.9431e-06
						194.492	1.78524e-10	2.64051e-10	1.97899e-06
						194.5	1.82823e-10	2.70594e-10	2.01552e-06
						194.508	1.87223e-10	2.77295e-10	2.05268e-06
						194.515	1.91726e-10	2.84158e-10	2.09051e-06
						194.523	1.96335e-10	2.91187e-10	2.129e-06
						194.53	2.01051e-10	2.98385e-10	2.16817e-06
						194.538	2.05878e-10	3.05756e-10	2.20803e-06
						194.546	2.10817e-10	3.13305e-10	2.24859e-06
						194.553	2.15871e-10	3.21035e-10	2.28986e-06
						194.561	2.21044e-10	3.28951e-10	2.33185e-06
						194.569	2.26337e-10	3.37058e-10	2.37458e-06
						194.576	2.31753e-10	3.45359e-10	2.41806e-06
						194.584	2.37296e-10	3.53859e-10	2.4623e-06
						194.592	2.42967e-10	3.62563e-10	2.50731e-06
						194.599	2.4877e-10	3.71476e-10	2.55311e-06
						194.607	2.54708e-10	3.80602e-10	2.59971e-06
						194.614	2.60784e-10	3.89947e-10	2.64712e-06
						194.622	2.67e-10	3.99515e-10	2.69536e-06
						194.63	2.73361e-10	4.09311e-10	2.74444e-06
						194.637	2.7987e-10	4.19342e-10	2.79437e-06
						194.645	2.86528e-10	4.29612e-10	2.84517e-06
						194.653	2.93341e-10	4.40128e-10	2.89685e-06
						194.66	3.00312e-10	4.50893e-10	2.94942e-06
						194.668	3.07443e-10	4.61916e-10	3.00291e-06
						194.676	3.1474e-10	4.73201e-10	3.05733e-06
						194.683	3.22204e-10	4.84754e-10	3.11268e-06
						194.691	3.29841e-10	4.96582e-10	3.169e-06
						194.698	3.37654e-10	5.08691e-10	3.22628e-06
						194.706	3.45646e-10	5.21087e-10	3.28456e-06
						194.714	3.53823e-10	5.33778e-10	3.34383e-06
						194.721	3.62187e-10	5.4677e-10	3.40413e-06
						194.729	3.70744e-10	5.6007e-10	3.46547e-06
						194.737	3.79497e-10	5.73684e-10	3.52787e-06
						194.744	3.88451e-10	5.87621e-10	3.59133e-06
						194.752	3.97611e-10	6.01888e-10	3.65589e-06
						194.76	4.0698e-10	6.16492e-10	3.72155e-06
						194.767	4.16564e-10	6.31441e-10	3.78833e-06
						194.775	4.26368e-10	6.46742e-10	3.85627e-06
						194.783	4.36395e-10	6.62405e-10	3.92536e-06
						194.79	4.46652e-10	6.78437e-10	3.99563e-06
						194.798	4.57143e-10	6.94847e-10	4.06711e-06
						194.806	4.67874e-10	7.11643e-10	4.1398e-06
						194.813	4.78849e-10	7.28834e-10	4.21373e-06
						194.821	4.90075e-10	7.4643e-10	4.28892e-06
						194.829	5.01556e-10	7.64439e-10	4.36539e-06
						194.836	5.13299e-10	7.82871e-10	4.44317e-06
						194.844	5.25308e-10	8.01736e-10	4.52226e-06
						194.851	5.37591e-10	8.21043e-10	4.60269e-06
						194.859	5.50153e-10	8.40802e-10	4.68449e-06
						194.867	5.63e-10	8.61024e-10	4.76768e-06
						194.874	5.76138e-10	8.8172e-10	4.85227e-06
						194.882	5.89574e-10	9.029e-10	4.93829e-06
						194.89	6.03315e-10	9.24575e-10	5.02577e-06
						194.897	6.17366e-10	9.46756e-10	5.11472e-06
						194.905	6.31736e-10	9.69455e-10	5.20518e-06
						194.913	6.46431e-10	9.92683e-10	5.29716e-06
						194.92	6.61457e-10	1.01645e-09	5.39068e-06
						194.928	6.76823e-10	1.04078e-09	5.48578e-06
						194.936	6.92535e-10	1.06567e-09	5.58248e-06
						194.943	7.08602e-10	1.09114e-09	5.68081e-06
						194.951	7.2503e-10	1.1172e-09	5.78078e-06
						194.959	7.41829e-10	1.14387e-09	5.88243e-06
						194.966	7.59006e-10	1.17115e-09	5.98578e-06
						194.974	7.76568e-10	1.19907e-09	6.09086e-06
						194.982	7.94526e-10	1.22764e-09	6.19769e-06
						194.989	8.12886e-10	1.25687e-09	6.30631e-06
						194.997	8.31659e-10	1.28677e-09	6.41675e-06
						195.005	8.50852e-10	1.31737e-09	6.52902e-06
						195.012	8.70476e-10	1.34868e-09	6.64317e-06
						195.02	8.90539e-10	1.38071e-09	6.75921e-06
						195.028	9.11051e-10	1.41348e-09	6.87719e-06
						195.035	9.32021e-10	1.447e-09	6.99712e-06
						195.043	9.53461e-10	1.4813e-09	7.11905e-06
						195.051	9.75379e-10	1.51639e-09	7.243e-06
						195.058	9.97786e-10	1.55229e-09	7.369e-06
						195.066	1.02069e-09	1.58902e-09	7.49708e-06
						195.074	1.04411e-09	1.62658e-09	7.62729e-06
						195.081	1.06805e-09	1.66502e-09	7.75965e-06
						195.089	1.09252e-09	1.70433e-09	7.89419e-06
						195.097	1.11753e-09	1.74455e-09	8.03095e-06
						195.104	1.14311e-09	1.7857e-09	8.16996e-06
						195.112	1.16925e-09	1.82778e-09	8.31127e-06
						195.12	1.19596e-09	1.87083e-09	8.45489e-06
						195.127	1.22328e-09	1.91486e-09	8.60088e-06
						195.135	1.25119e-09	1.95991e-09	8.74927e-06
						195.143	1.27973e-09	2.00598e-09	8.90009e-06
						195.151	1.3089e-09	2.05311e-09	9.05338e-06
						195.158	1.33871e-09	2.10131e-09	9.20918e-06
						195.166	1.36918e-09	2.15061e-09	9.36753e-06
						195.174	1.40032e-09	2.20104e-09	9.52847e-06
						195.181	1.43215e-09	2.25261e-09	9.69203e-06
						195.189	1.46468e-09	2.30536e-09	9.85827e-06
						195.197	1.49793e-09	2.35931e-09	1.00272e-05
						195.204	1.53192e-09	2.41449e-09	1.01989e-05
						195.212	1.56665e-09	2.47092e-09	1.03734e-05
						195.22	1.60214e-09	2.52864e-09	1.05507e-05
						195.227	1.63841e-09	2.58766e-09	1.07309e-05
						195.235	1.67548e-09	2.64802e-09	1.09141e-05
						195.243	1.71336e-09	2.70975e-09	1.11002e-05
						195.25	1.75208e-09	2.77288e-09	1.12893e-05
						195.258	1.79164e-09	2.83744e-09	1.14815e-05
						195.266	1.83207e-09	2.90346e-09	1.16767e-05
						195.273	1.87338e-09	2.97097e-09	1.18752e-05
						195.281	1.9156e-09	3.04001e-09	1.20768e-05
						195.289	1.95874e-09	3.1106e-09	1.22817e-05
						195.297	2.00282e-09	3.18279e-09	1.24899e-05
						195.304	2.04787e-09	3.25661e-09	1.27014e-05
						195.312	2.09389e-09	3.33208e-09	1.29164e-05
						195.32	2.14092e-09	3.40926e-09	1.31348e-05
						195.327	2.18897e-09	3.48818e-09	1.33567e-05
						195.335	2.23807e-09	3.56886e-09	1.35821e-05
						195.343	2.28824e-09	3.65137e-09	1.38112e-05
						195.35	2.33949e-09	3.73572e-09	1.40439e-05
						195.358	2.39186e-09	3.82197e-09	1.42804e-05
						195.366	2.44537e-09	3.91015e-09	1.45206e-05
						195.373	2.50003e-09	4.0003e-09	1.47647e-05
						195.381	2.55588e-09	4.09248e-09	1.50126e-05
						195.389	2.61294e-09	4.18672e-09	1.52645e-05
						195.397	2.67124e-09	4.28306e-09	1.55204e-05
						195.404	2.73079e-09	4.38156e-09	1.57804e-05
						195.412	2.79163e-09	4.48226e-09	1.60445e-05
						195.42	2.85379e-09	4.5852e-09	1.63128e-05
						195.427	2.91728e-09	4.69044e-09	1.65854e-05
						195.435	2.98215e-09	4.79803e-09	1.68623e-05
						195.443	3.04841e-09	4.90801e-09	1.71436e-05
						195.45	3.1161e-09	5.02044e-09	1.74293e-05
						195.458	3.18525e-09	5.13537e-09	1.77195e-05
						195.466	3.25588e-09	5.25285e-09	1.80143e-05
						195.474	3.32803e-09	5.37294e-09	1.83137e-05
						195.481	3.40173e-09	5.4957e-09	1.86179e-05
						195.489	3.47701e-09	5.62118e-09	1.89269e-05
						195.497	3.5539e-09	5.74945e-09	1.92407e-05
						195.504	3.63244e-09	5.88055e-09	1.95594e-05
						195.512	3.71267e-09	6.01455e-09	1.98832e-05
						195.52	3.7946e-09	6.15152e-09	2.0212e-05
						195.528	3.87829e-09	6.29152e-09	2.0546e-05
						195.535	3.96377e-09	6.4346e-09	2.08852e-05
						195.543	4.05108e-09	6.58085e-09	2.12297e-05
						195.551	4.14024e-09	6.73032e-09	2.15795e-05
						195.558	4.23131e-09	6.88309e-09	2.19349e-05
						195.566	4.32431e-09	7.03922e-09	2.22958e-05
						195.574	4.4193e-09	7.19879e-09	2.26623e-05
						195.582	4.5163e-09	7.36186e-09	2.30345e-05
						195.589	4.61537e-09	7.52852e-09	2.34125e-05
						195.597	4.71654e-09	7.69885e-09	2.37964e-05
						195.605	4.81986e-09	7.87291e-09	2.41862e-05
						195.612	4.92538e-09	8.05079e-09	2.45821e-05
						195.62	5.03312e-09	8.23256e-09	2.4984e-05
						195.628	5.14315e-09	8.41832e-09	2.53923e-05
						195.636	5.25551e-09	8.60815e-09	2.58068e-05
						195.643	5.37024e-09	8.80213e-09	2.62277e-05
						195.651	5.4874e-09	9.00035e-09	2.66552e-05
						195.659	5.60704e-09	9.20289e-09	2.70892e-05
						195.666	5.72919e-09	9.40986e-09	2.75299e-05
						195.674	5.85393e-09	9.62135e-09	2.79774e-05
						195.682	5.98129e-09	9.83744e-09	2.84317e-05
						195.69	6.11133e-09	1.00582e-08	2.8893e-05
						195.697	6.24411e-09	1.02838e-08	2.93615e-05
						195.705	6.37969e-09	1.05144e-08	2.98371e-05
						195.713	6.51811e-09	1.07499e-08	3.03199e-05
						195.72	6.65944e-09	1.09905e-08	3.08102e-05
						195.728	6.80373e-09	1.12364e-08	3.13079e-05
						195.736	6.95105e-09	1.14876e-08	3.18133e-05
						195.744	7.10145e-09	1.17442e-08	3.23264e-05
						195.751	7.25501e-09	1.20064e-08	3.28472e-05
						195.759	7.41177e-09	1.22743e-08	3.33761e-05
						195.767	7.57182e-09	1.2548e-08	3.39129e-05
						195.775	7.7352e-09	1.28276e-08	3.44579e-05
						195.782	7.902e-09	1.31132e-08	3.50112e-05
						195.79	8.07228e-09	1.3405e-08	3.55729e-05
						195.798	8.2461e-09	1.37031e-08	3.61431e-05
						195.805	8.42355e-09	1.40076e-08	3.67219e-05
						195.813	8.60469e-09	1.43187e-08	3.73095e-05
						195.821	8.7896e-09	1.46364e-08	3.79059e-05
						195.829	8.97835e-09	1.4961e-08	3.85114e-05
						195.836	9.17103e-09	1.52926e-08	3.9126e-05
						195.844	9.3677e-09	1.56313e-08	3.97498e-05
						195.852	9.56845e-09	1.59773e-08	4.0383e-05
						195.86	9.77336e-09	1.63307e-08	4.10258e-05
						195.867	9.98251e-09	1.66916e-08	4.16782e-05
						195.875	1.0196e-08	1.70603e-08	4.23404e-05
						195.883	1.04139e-08	1.74369e-08	4.30125e-05
						195.891	1.06363e-08	1.78216e-08	4.36947e-05
						195.898	1.08633e-08	1.82144e-08	4.43871e-05
						195.906	1.1095e-08	1.86157e-08	4.50898e-05
						195.914	1.13314e-08	1.90255e-08	4.58031e-05
						195.921	1.15727e-08	1.94441e-08	4.65269e-05
						195.929	1.1819e-08	1.98716e-08	4.72616e-05
						195.937	1.20704e-08	2.03082e-08	4.80072e-05
						195.945	1.23269e-08	2.0754e-08	4.87639e-05
						195.952	1.25887e-08	2.12094e-08	4.95318e-05
						195.96	1.28559e-08	2.16744e-08	5.03112e-05
						195.968	1.31285e-08	2.21494e-08	5.11021e-05
						195.976	1.34068e-08	2.26344e-08	5.19047e-05
						195.983	1.36907e-08	2.31296e-08	5.27192e-05
						195.991	1.39804e-08	2.36354e-08	5.35457e-05
						195.999	1.42761e-08	2.41519e-08	5.43845e-05
						196.007	1.45778e-08	2.46793e-08	5.52356e-05
						196.014	1.48857e-08	2.52179e-08	5.60993e-05
						196.022	1.51999e-08	2.57679e-08	5.69757e-05
						196.03	1.55205e-08	2.63294e-08	5.7865e-05
						196.038	1.58476e-08	2.69029e-08	5.87674e-05
						196.045	1.61813e-08	2.74884e-08	5.9683e-05
						196.053	1.65219e-08	2.80862e-08	6.06121e-05
						196.061	1.68694e-08	2.86967e-08	6.15548e-05
						196.069	1.72239e-08	2.93199e-08	6.25113e-05
						196.076	1.75856e-08	2.99563e-08	6.34817e-05
						196.084	1.79547e-08	3.06061e-08	6.44664e-05
						196.092	1.83313e-08	3.12695e-08	6.54654e-05
						196.1	1.87154e-08	3.19468e-08	6.6479e-05
						196.107	1.91074e-08	3.26383e-08	6.75074e-05
						196.115	1.95073e-08	3.33444e-08	6.85508e-05
						196.123	1.99153e-08	3.40651e-08	6.96093e-05
						196.131	2.03315e-08	3.4801e-08	7.06832e-05
						196.138	2.07561e-08	3.55523e-08	7.17726e-05
						196.146	2.11893e-08	3.63192e-08	7.28779e-05
						196.154	2.16312e-08	3.71022e-08	7.39992e-05
						196.162	2.2082e-08	3.79015e-08	7.51367e-05
						196.169	2.25419e-08	3.87175e-08	7.62907e-05
						196.177	2.3011e-08	3.95504e-08	7.74613e-05
						196.185	2.34895e-08	4.04007e-08	7.86488e-05
						196.193	2.39777e-08	4.12687e-08	7.98534e-05
						196.201	2.44756e-08	4.21548e-08	8.10754e-05
						196.208	2.49836e-08	4.30592e-08	8.23149e-05
						196.216	2.55017e-08	4.39824e-08	8.35722e-05
						196.224	2.60302e-08	4.49248e-08	8.48476e-05
						196.232	2.65692e-08	4.58867e-08	8.61413e-05
						196.239	2.7119e-08	4.68685e-08	8.74535e-05
						196.247	2.76799e-08	4.78706e-08	8.87845e-05
						196.255	2.82519e-08	4.88935e-08	9.01346e-05
						196.263	2.88353e-08	4.99375e-08	9.15039e-05
						196.27	2.94303e-08	5.10031e-08	9.28927e-05
						196.278	3.00372e-08	5.20906e-08	9.43014e-05
						196.286	3.06561e-08	5.32006e-08	9.57301e-05
						196.294	3.12874e-08	5.43335e-08	9.71791e-05
						196.301	3.19312e-08	5.54897e-08	9.86487e-05
						196.309	3.25878e-08	5.66696e-08	0.000100139
						196.317	3.32574e-08	5.78739e-08	0.000101651
						196.325	3.39403e-08	5.91029e-08	0.000103184
						196.333	3.46368e-08	6.03571e-08	0.000104739
						196.34	3.5347e-08	6.1637e-08	0.000106315
						196.348	3.60712e-08	6.29432e-08	0.000107914
						196.356	3.68098e-08	6.42762e-08	0.000109536
						196.364	3.75629e-08	6.56364e-08	0.00011118
						196.371	3.8331e-08	6.70245e-08	0.000112848
						196.379	3.91141e-08	6.8441e-08	0.000114539
						196.387	3.99127e-08	6.98864e-08	0.000116254
						196.395	4.07271e-08	7.13613e-08	0.000117992
						196.403	4.15574e-08	7.28662e-08	0.000119756
						196.41	4.24041e-08	7.44019e-08	0.000121544
						196.418	4.32674e-08	7.59688e-08	0.000123357
						196.426	4.41476e-08	7.75677e-08	0.000125195
						196.434	4.50452e-08	7.9199e-08	0.000127059
						196.441	4.59603e-08	8.08635e-08	0.000128949
						196.449	4.68933e-08	8.25618e-08	0.000130865
						196.457	4.78446e-08	8.42946e-08	0.000132808
						196.465	4.88145e-08	8.60625e-08	0.000134778
						196.473	4.98034e-08	8.78663e-08	0.000136776
						196.48	5.08115e-08	8.97065e-08	0.000138801
						196.488	5.18394e-08	9.1584e-08	0.000140854
						196.496	5.28873e-08	9.34995e-08	0.000142936
						196.504	5.39556e-08	9.54537e-08	0.000145047
						196.511	5.50447e-08	9.74473e-08	0.000147186
						196.519	5.6155e-08	9.94812e-08	0.000149355
						196.527	5.72868e-08	1.01556e-07	0.000151555
						196.535	5.84407e-08	1.03673e-07	0.000153784
						196.543	5.9617e-08	1.05832e-07	0.000156044
						196.55	6.0816e-08	1.08035e-07	0.000158336
						196.558	6.20383e-08	1.10282e-07	0.000160658
						196.566	6.32843e-08	1.12574e-07	0.000163013
						196.574	6.45544e-08	1.14912e-07	0.0001654
						196.582	6.58491e-08	1.17297e-07	0.000167819
						196.589	6.71687e-08	1.1973e-07	0.000170272
						196.597	6.85139e-08	1.22211e-07	0.000172758
						196.605	6.9885e-08	1.24742e-07	0.000175279
						196.613	7.12825e-08	1.27324e-07	0.000177833
						196.621	7.27069e-08	1.29958e-07	0.000180423
						196.628	7.41588e-08	1.32644e-07	0.000183047
						196.636	7.56386e-08	1.35383e-07	0.000185707
						196.644	7.71468e-08	1.38178e-07	0.000188404
						196.652	7.8684e-08	1.41027e-07	0.000191137
						196.66	8.02507e-08	1.43934e-07	0.000193907
						196.667	8.18474e-08	1.46899e-07	0.000196715
						196.675	8.34748e-08	1.49922e-07	0.00019956
						196.683	8.51333e-08	1.53005e-07	0.000202444
						196.691	8.68235e-08	1.5615e-07	0.000205367
						196.699	8.8546e-08	1.59357e-07	0.00020833
						196.706	9.03014e-08	1.62628e-07	0.000211332
						196.714	9.20904e-08	1.65963e-07	0.000214374
						196.722	9.39134e-08	1.69364e-07	0.000217458
						196.73	9.57712e-08	1.72833e-07	0.000220583
						196.738	9.76644e-08	1.7637e-07	0.00022375
						196.745	9.95936e-08	1.79977e-07	0.000226959
						196.753	1.01559e-07	1.83656e-07	0.000230212
						196.761	1.03563e-07	1.87406e-07	0.000233507
						196.769	1.05604e-07	1.91231e-07	0.000236847
						196.777	1.07684e-07	1.95131e-07	0.000240232
						196.784	1.09803e-07	1.99108e-07	0.000243661
						196.792	1.11963e-07	2.03162e-07	0.000247136
						196.8	1.14163e-07	2.07297e-07	0.000250658
						196.808	1.16406e-07	2.11513e-07	0.000254226
						196.816	1.1869e-07	2.15811e-07	0.000257841
						196.823	1.21017e-07	2.20194e-07	0.000261505
						196.831	1.23389e-07	2.24662e-07	0.000265217
						196.839	1.25805e-07	2.29218e-07	0.000268978
						196.847	1.28267e-07	2.33863e-07	0.000272789
						196.855	1.30775e-07	2.38599e-07	0.00027665
						196.863	1.3333e-07	2.43427e-07	0.000280562
						196.87	1.35933e-07	2.48349e-07	0.000284526
						196.878	1.38586e-07	2.53368e-07	0.000288541
						196.886	1.41288e-07	2.58484e-07	0.00029261
						196.894	1.4404e-07	2.637e-07	0.000296732
						196.902	1.46844e-07	2.69017e-07	0.000300908
						196.909	1.49701e-07	2.74437e-07	0.000305139
						196.917	1.52611e-07	2.79963e-07	0.000309425
						196.925	1.55576e-07	2.85596e-07	0.000313767
						196.933	1.58596e-07	2.91339e-07	0.000318166
						196.941	1.61672e-07	2.97192e-07	0.000322623
						196.948	1.64806e-07	3.03159e-07	0.000327137
						196.956	1.67998e-07	3.09242e-07	0.000331711
						196.964	1.71249e-07	3.15442e-07	0.000336343
						196.972	1.74561e-07	3.21762e-07	0.000341036
						196.98	1.77935e-07	3.28204e-07	0.00034579
						196.988	1.81371e-07	3.3477e-07	0.000350606
						196.995	1.84871e-07	3.41463e-07	0.000355483
						197.003	1.88436e-07	3.48285e-07	0.000360424
						197.011	1.92068e-07	3.55238e-07	0.000365429
						197.019	1.95766e-07	3.62324e-07	0.000370499
						197.027	1.99533e-07	3.69547e-07	0.000375633
						197.035	2.03369e-07	3.76909e-07	0.000380834
						197.042	2.07277e-07	3.84412e-07	0.000386102
						197.05	2.11256e-07	3.92059e-07	0.000391438
						197.058	2.15309e-07	3.99852e-07	0.000396842
						197.066	2.19437e-07	4.07795e-07	0.000402315
						197.074	2.23641e-07	4.15889e-07	0.000407859
						197.082	2.27922e-07	4.24139e-07	0.000413473
						197.089	2.32281e-07	4.32545e-07	0.00041916
						197.097	2.36721e-07	4.41113e-07	0.000424919
						197.105	2.41243e-07	4.49844e-07	0.000430751
						197.113	2.45847e-07	4.58741e-07	0.000436658
						197.121	2.50536e-07	4.67807e-07	0.00044264
						197.129	2.55311e-07	4.77046e-07	0.000448697
						197.136	2.60173e-07	4.86461e-07	0.000454832
						197.144	2.65124e-07	4.96055e-07	0.000461045
						197.152	2.70166e-07	5.05831e-07	0.000467336
						197.16	2.753e-07	5.15792e-07	0.000473708
						197.168	2.80527e-07	5.25942e-07	0.000480159
						197.176	2.8585e-07	5.36285e-07	0.000486692
						197.183	2.9127e-07	5.46823e-07	0.000493308
						197.191	2.96788e-07	5.5756e-07	0.000500007
						197.199	3.02407e-07	5.68501e-07	0.00050679
						197.207	3.08128e-07	5.79648e-07	0.000513659
						197.215	3.13953e-07	5.91005e-07	0.000520614
						197.223	3.19884e-07	6.02577e-07	0.000527656
						197.23	3.25922e-07	6.14367e-07	0.000534787
						197.238	3.3207e-07	6.26378e-07	0.000542006
						197.246	3.38329e-07	6.38616e-07	0.000549316
						197.254	3.44701e-07	6.51083e-07	0.000556718
						197.262	3.51188e-07	6.63785e-07	0.000564212
						197.27	3.57793e-07	6.76726e-07	0.000571799
						197.278	3.64517e-07	6.89908e-07	0.00057948
						197.285	3.71362e-07	7.03338e-07	0.000587258
						197.293	3.7833e-07	7.1702e-07	0.000595132
						197.301	3.85424e-07	7.30957e-07	0.000603103
						197.309	3.92646e-07	7.45155e-07	0.000611174
						197.317	3.99997e-07	7.59619e-07	0.000619344
						197.325	4.07481e-07	7.74352e-07	0.000627615
						197.332	4.15099e-07	7.8936e-07	0.000635989
						197.34	4.22853e-07	8.04648e-07	0.000644466
						197.348	4.30747e-07	8.20221e-07	0.000653048
						197.356	4.38782e-07	8.36083e-07	0.000661735
						197.364	4.46961e-07	8.52241e-07	0.000670529
						197.372	4.55286e-07	8.68698e-07	0.000679431
						197.38	4.6376e-07	8.85462e-07	0.000688442
						197.387	4.72385e-07	9.02536e-07	0.000697564
						197.395	4.81164e-07	9.19927e-07	0.000706798
						197.403	4.90099e-07	9.3764e-07	0.000716144
						197.411	4.99194e-07	9.55681e-07	0.000725605
						197.419	5.0845e-07	9.74055e-07	0.000735181
						197.427	5.17871e-07	9.9277e-07	0.000744874
						197.435	5.2746e-07	1.01183e-06	0.000754685
						197.442	5.37218e-07	1.03124e-06	0.000764616
						197.45	5.4715e-07	1.05101e-06	0.000774667
						197.458	5.57258e-07	1.07114e-06	0.00078484
						197.466	5.67545e-07	1.09165e-06	0.000795136
						197.474	5.78014e-07	1.11253e-06	0.000805557
						197.482	5.88669e-07	1.13379e-06	0.000816105
						197.49	5.99511e-07	1.15545e-06	0.000826779
						197.498	6.10545e-07	1.1775e-06	0.000837583
						197.505	6.21774e-07	1.19996e-06	0.000848516
						197.513	6.332e-07	1.22283e-06	0.000859582
						197.521	6.44828e-07	1.24612e-06	0.00087078
						197.529	6.56661e-07	1.26983e-06	0.000882113
						197.537	6.68702e-07	1.29398e-06	0.000893582
						197.545	6.80954e-07	1.31857e-06	0.000905188
						197.553	6.93421e-07	1.34361e-06	0.000916934
						197.56	7.06108e-07	1.3691e-06	0.00092882
						197.568	7.19016e-07	1.39506e-06	0.000940848
						197.576	7.32151e-07	1.42149e-06	0.000953019
						197.584	7.45516e-07	1.4484e-06	0.000965336
						197.592	7.59115e-07	1.4758e-06	0.000977799
						197.6	7.72951e-07	1.5037e-06	0.00099041
						197.608	7.87029e-07	1.53211e-06	0.001
						197.616	8.01352e-07	1.56103e-06	0.00102
						197.623	8.15926e-07	1.59048e-06	0.00103
						197.631	8.30753e-07	1.62045e-06	0.00104
						197.639	8.45838e-07	1.65098e-06	0.00106
						197.647	8.61186e-07	1.68205e-06	0.00107
						197.655	8.768e-07	1.71368e-06	0.00108
						197.663	8.92686e-07	1.74589e-06	0.0011
						197.671	9.08847e-07	1.77867e-06	0.00111
						197.679	9.25289e-07	1.81205e-06	0.00113
						197.686	9.42015e-07	1.84603e-06	0.00114
						197.694	9.59031e-07	1.88062e-06	0.00115
						197.702	9.76341e-07	1.91583e-06	0.00117
						197.71	9.93951e-07	1.95168e-06	0.00118
						197.718	1.01186e-06	1.98816e-06	0.0012
						197.726	1.03009e-06	2.02531e-06	0.00121
						197.734	1.04862e-06	2.06312e-06	0.00123
						197.742	1.06748e-06	2.1016e-06	0.00124
						197.75	1.08666e-06	2.14078e-06	0.00126
						197.757	1.10617e-06	2.18065e-06	0.00128
						197.765	1.12602e-06	2.22124e-06	0.00129
						197.773	1.14621e-06	2.26255e-06	0.00131
						197.781	1.16674e-06	2.3046e-06	0.00133
						197.789	1.18763e-06	2.3474e-06	0.00134
						197.797	1.20887e-06	2.39096e-06	0.00136
						197.805	1.23048e-06	2.4353e-06	0.00138
						197.813	1.25245e-06	2.48042e-06	0.00139
						197.821	1.27481e-06	2.52635e-06	0.00141
						197.828	1.29754e-06	2.57309e-06	0.00143
						197.836	1.32066e-06	2.62066e-06	0.00145
						197.844	1.34418e-06	2.66908e-06	0.00146
						197.852	1.3681e-06	2.71835e-06	0.00148
						197.86	1.39242e-06	2.76849e-06	0.0015
						197.868	1.41716e-06	2.81953e-06	0.00152
						197.876	1.44232e-06	2.87146e-06	0.00154
						197.884	1.4679e-06	2.92431e-06	0.00156
						197.892	1.49392e-06	2.97809e-06	0.00158
						197.899	1.52039e-06	3.03282e-06	0.0016
						197.907	1.5473e-06	3.08852e-06	0.00162
						197.915	1.57466e-06	3.14519e-06	0.00164
						197.923	1.60249e-06	3.20286e-06	0.00166
						197.931	1.63079e-06	3.26155e-06	0.00168
						197.939	1.65957e-06	3.32126e-06	0.0017
						197.947	1.68883e-06	3.38203e-06	0.00172
						197.955	1.71858e-06	3.44386e-06	0.00174
						197.963	1.74884e-06	3.50677e-06	0.00176
						197.971	1.77961e-06	3.57078e-06	0.00178
						197.978	1.81089e-06	3.63591e-06	0.0018
						197.986	1.8427e-06	3.70218e-06	0.00183
						197.994	1.87505e-06	3.76961e-06	0.00185
						198.002	1.90794e-06	3.83821e-06	0.00187
						198.01	1.94137e-06	3.90801e-06	0.0019
						198.018	1.97537e-06	3.97903e-06	0.00192
						198.026	2.00994e-06	4.05128e-06	0.00194
						198.034	2.04509e-06	4.12479e-06	0.00197
						198.042	2.08082e-06	4.19958e-06	0.00199
						198.05	2.11715e-06	4.27566e-06	0.00201
						198.058	2.15409e-06	4.35306e-06	0.00204
						198.065	2.19164e-06	4.43181e-06	0.00206
						198.073	2.22982e-06	4.51192e-06	0.00209
						198.081	2.26864e-06	4.59341e-06	0.00211
						198.089	2.3081e-06	4.67632e-06	0.00214
						198.097	2.34821e-06	4.76066e-06	0.00216
						198.105	2.389e-06	4.84645e-06	0.00219
						198.113	2.43045e-06	4.93372e-06	0.00222
						198.121	2.4726e-06	5.0225e-06	0.00224
						198.129	2.51545e-06	5.11281e-06	0.00227
						198.137	2.559e-06	5.20467e-06	0.0023
						198.145	2.60328e-06	5.29811e-06	0.00233
						198.152	2.64828e-06	5.39316e-06	0.00235
						198.16	2.69403e-06	5.48984e-06	0.00238
						198.168	2.74054e-06	5.58817e-06	0.00241
						198.176	2.78781e-06	5.6882e-06	0.00244
						198.184	2.83586e-06	5.78993e-06	0.00247
						198.192	2.8847e-06	5.89341e-06	0.0025
						198.2	2.93435e-06	5.99865e-06	0.00253
						198.208	2.98481e-06	6.1057e-06	0.00256
						198.216	3.0361e-06	6.21457e-06	0.00259
						198.224	3.08823e-06	6.32529e-06	0.00262
						198.232	3.14121e-06	6.43791e-06	0.00265
						198.24	3.19507e-06	6.55244e-06	0.00268
						198.248	3.24981e-06	6.66892e-06	0.00271
						198.255	3.30544e-06	6.78738e-06	0.00275
						198.263	3.36198e-06	6.90786e-06	0.00278
						198.271	3.41944e-06	7.03038e-06	0.00281
						198.279	3.47784e-06	7.15497e-06	0.00284
						198.287	3.5372e-06	7.28168e-06	0.00288
						198.295	3.59752e-06	7.41053e-06	0.00291
						198.303	3.65882e-06	7.54157e-06	0.00295
						198.311	3.72112e-06	7.67481e-06	0.00298
						198.319	3.78444e-06	7.81031e-06	0.00302
						198.327	3.84878e-06	7.9481e-06	0.00305
						198.335	3.91416e-06	8.08821e-06	0.00309
						198.343	3.98061e-06	8.23068e-06	0.00312
						198.351	4.04813e-06	8.37555e-06	0.00316
						198.359	4.11674e-06	8.52285e-06	0.0032
						198.366	4.18647e-06	8.67263e-06	0.00323
						198.374	4.25732e-06	8.82493e-06	0.00327
						198.382	4.32932e-06	8.97978e-06	0.00331
						198.39	4.40247e-06	9.13723e-06	0.00335
						198.398	4.47681e-06	9.29732e-06	0.00339
						198.406	4.55235e-06	9.46009e-06	0.00343
						198.414	4.6291e-06	9.62558e-06	0.00347
						198.422	4.70708e-06	9.79383e-06	0.00351
						198.43	4.78632e-06	9.96489e-06	0.00355
						198.438	4.86683e-06	1.01388e-05	0.00359
						198.446	4.94864e-06	1.03156e-05	0.00363
						198.454	5.03175e-06	1.04954e-05	0.00367
						198.462	5.1162e-06	1.06781e-05	0.00371
						198.47	5.20199e-06	1.08639e-05	0.00376
						198.478	5.28916e-06	1.10528e-05	0.0038
						198.486	5.37773e-06	1.12448e-05	0.00384
						198.494	5.4677e-06	1.144e-05	0.00389
						198.501	5.55912e-06	1.16385e-05	0.00393
						198.509	5.65199e-06	1.18402e-05	0.00398
						198.517	5.74634e-06	1.20453e-05	0.00402
						198.525	5.84219e-06	1.22537e-05	0.00407
						198.533	5.93956e-06	1.24656e-05	0.00411
						198.541	6.03849e-06	1.2681e-05	0.00416
						198.549	6.13898e-06	1.28999e-05	0.00421
						198.557	6.24107e-06	1.31225e-05	0.00426
						198.565	6.34478e-06	1.33487e-05	0.0043
						198.573	6.45013e-06	1.35787e-05	0.00435
						198.581	6.55715e-06	1.38124e-05	0.0044
						198.589	6.66586e-06	1.40499e-05	0.00445
						198.597	6.77628e-06	1.42914e-05	0.0045
						198.605	6.88846e-06	1.45368e-05	0.00455
						198.613	7.0024e-06	1.47863e-05	0.0046
						198.621	7.11814e-06	1.50398e-05	0.00466
						198.629	7.2357e-06	1.52974e-05	0.00471
						198.637	7.35511e-06	1.55593e-05	0.00476
						198.645	7.4764e-06	1.58255e-05	0.00481
						198.653	7.59959e-06	1.6096e-05	0.00487
						198.66	7.72472e-06	1.63709e-05	0.00492
						198.668	7.85182e-06	1.66503e-05	0.00498
						198.676	7.9809e-06	1.69342e-05	0.00503
						198.684	8.11201e-06	1.72228e-05	0.00509
						198.692	8.24517e-06	1.7516e-05	0.00515
						198.7	8.38041e-06	1.7814e-05	0.0052
						198.708	8.51776e-06	1.81168e-05	0.00526
						198.716	8.65726e-06	1.84246e-05	0.00532
						198.724	8.79894e-06	1.87373e-05	0.00538
						198.732	8.94282e-06	1.90551e-05	0.00544
						198.74	9.08895e-06	1.9378e-05	0.0055
						198.748	9.23735e-06	1.97061e-05	0.00556
						198.756	9.38806e-06	2.00396e-05	0.00562
						198.764	9.54111e-06	2.03784e-05	0.00569
						198.772	9.69653e-06	2.07227e-05	0.00575
						198.78	9.85437e-06	2.10725e-05	0.00581
						198.788	1.00147e-05	2.14279e-05	0.00588
						198.796	1.01774e-05	2.17891e-05	0.00594
						198.804	1.03427e-05	2.2156e-05	0.00601
						198.812	1.05105e-05	2.25289e-05	0.00607
						198.82	1.0681e-05	2.29077e-05	0.00614
						198.828	1.0854e-05	2.32926e-05	0.00621
						198.836	1.10298e-05	2.36836e-05	0.00627
						198.844	1.12082e-05	2.40809e-05	0.00634
						198.852	1.13894e-05	2.44846e-05	0.00641
						198.86	1.15734e-05	2.48947e-05	0.00648
						198.868	1.17602e-05	2.53113e-05	0.00655
						198.876	1.19499e-05	2.57346e-05	0.00662
						198.884	1.21425e-05	2.61646e-05	0.00669
						198.892	1.2338e-05	2.66015e-05	0.00677
						198.899	1.25366e-05	2.70453e-05	0.00684
						198.907	1.27382e-05	2.74961e-05	0.00692
						198.915	1.29428e-05	2.79541e-05	0.00699
						198.923	1.31506e-05	2.84194e-05	0.00707
						198.931	1.33616e-05	2.8892e-05	0.00714
						198.939	1.35758e-05	2.93722e-05	0.00722
						198.947	1.37933e-05	2.98599e-05	0.0073
						198.955	1.4014e-05	3.03553e-05	0.00738
						198.963	1.42382e-05	3.08586e-05	0.00745
						198.971	1.44657e-05	3.13698e-05	0.00753
						198.979	1.46967e-05	3.1889e-05	0.00762
						198.987	1.49313e-05	3.24164e-05	0.0077
						198.995	1.51693e-05	3.29522e-05	0.00778
						199.003	1.5411e-05	3.34963e-05	0.00786
						199.011	1.56564e-05	3.4049e-05	0.00795
						199.019	1.59055e-05	3.46104e-05	0.00803
						199.027	1.61583e-05	3.51806e-05	0.00812
						199.035	1.6415e-05	3.57597e-05	0.0082
						199.043	1.66755e-05	3.63479e-05	0.00829
						199.051	1.694e-05	3.69453e-05	0.00838
						199.059	1.72085e-05	3.7552e-05	0.00847
						199.067	1.7481e-05	3.81682e-05	0.00856
						199.075	1.77576e-05	3.8794e-05	0.00865
						199.083	1.80384e-05	3.94296e-05	0.00874
						199.091	1.83234e-05	4.00751e-05	0.00883
						199.099	1.86126e-05	4.07306e-05	0.00893
						199.107	1.89063e-05	4.13963e-05	0.00902
						199.115	1.92043e-05	4.20723e-05	0.00911
						199.123	1.95068e-05	4.27589e-05	0.00921
						199.131	1.98138e-05	4.34561e-05	0.00931
						199.139	2.01254e-05	4.41641e-05	0.0094
						199.147	2.04417e-05	4.48831e-05	0.0095
						199.155	2.07627e-05	4.56132e-05	0.0096
						199.163	2.10885e-05	4.63545e-05	0.0097
						199.171	2.14192e-05	4.71074e-05	0.0098
						199.179	2.17548e-05	4.78718e-05	0.00991
						199.187	2.20953e-05	4.8648e-05	0.01001
						199.195	2.2441e-05	4.94362e-05	0.01011
						199.203	2.27918e-05	5.02366e-05	0.01022
						199.211	2.31478e-05	5.10492e-05	0.01033
						199.219	2.35091e-05	5.18743e-05	0.01043
						199.227	2.38757e-05	5.27121e-05	0.01054
						199.235	2.42478e-05	5.35627e-05	0.01065
						199.243	2.46254e-05	5.44264e-05	0.01076
						199.251	2.50086e-05	5.53033e-05	0.01087
						199.259	2.53974e-05	5.61936e-05	0.01098
						199.267	2.5792e-05	5.70975e-05	0.0111
						199.275	2.61924e-05	5.80153e-05	0.01121
						199.283	2.65987e-05	5.8947e-05	0.01133
						199.291	2.7011e-05	5.98929e-05	0.01144
						199.299	2.74294e-05	6.08533e-05	0.01156
						199.307	2.78539e-05	6.18282e-05	0.01168
						199.315	2.82847e-05	6.2818e-05	0.0118
						199.323	2.87218e-05	6.38229e-05	0.01192
						199.331	2.91653e-05	6.4843e-05	0.01204
						199.339	2.96154e-05	6.58785e-05	0.01216
						199.347	3.0072e-05	6.69298e-05	0.01229
						199.355	3.05353e-05	6.79969e-05	0.01241
						199.363	3.10054e-05	6.90803e-05	0.01254
						199.371	3.14823e-05	7.018e-05	0.01266
						199.379	3.19663e-05	7.12963e-05	0.01279
						199.387	3.24573e-05	7.24294e-05	0.01292
						199.395	3.29554e-05	7.35796e-05	0.01305
						199.403	3.34608e-05	7.47472e-05	0.01319
						199.411	3.39736e-05	7.59323e-05	0.01332
						199.419	3.44938e-05	7.71352e-05	0.01345
						199.427	3.50216e-05	7.83563e-05	0.01359
						199.435	3.55571e-05	7.95956e-05	0.01373
						199.443	3.61004e-05	8.08535e-05	0.01386
						199.451	3.66515e-05	8.21303e-05	0.014
						199.459	3.72106e-05	8.34262e-05	0.01414
						199.467	3.77778e-05	8.47415e-05	0.01428
						199.476	3.83532e-05	8.60764e-05	0.01443
						199.484	3.8937e-05	8.74313e-05	0.01457
						199.492	3.95291e-05	8.88064e-05	0.01472
						199.5	4.01299e-05	9.0202e-05	0.01486
						199.508	4.07392e-05	9.16184e-05	0.01501
						199.516	4.13574e-05	9.30558e-05	0.01516
						199.524	4.19845e-05	9.45146e-05	0.01531
						199.532	4.26206e-05	9.59951e-05	0.01546
						199.54	4.32658e-05	9.74976e-05	0.01562
						199.548	4.39203e-05	9.90223e-05	0.01577
						199.556	4.45842e-05	0.00010057	0.01593
						199.564	4.52576e-05	0.00010214	0.01608
						199.572	4.59407e-05	0.000103733	0.01624
						199.58	4.66336e-05	0.00010535	0.0164
						199.588	4.73364e-05	0.000106991	0.01656
						199.596	4.80492e-05	0.000108656	0.01673
						199.604	4.87722e-05	0.000110346	0.01689
						199.612	4.95055e-05	0.00011206	0.01706
						199.62	5.02493e-05	0.0001138	0.01722
						199.628	5.10037e-05	0.000115565	0.01739
						199.636	5.17689e-05	0.000117357	0.01756
						199.644	5.25449e-05	0.000119174	0.01773
						199.652	5.3332e-05	0.000121018	0.01791
						199.66	5.41302e-05	0.000122889	0.01808
						199.668	5.49398e-05	0.000124788	0.01826
						199.676	5.57608e-05	0.000126714	0.01843
						199.684	5.65936e-05	0.000128669	0.01861
						199.692	5.7438e-05	0.000130651	0.01879
						199.7	5.82945e-05	0.000132663	0.01898
						199.708	5.9163e-05	0.000134705	0.01916
						199.716	6.00439e-05	0.000136775	0.01934
						199.725	6.09371e-05	0.000138876	0.01953
						199.733	6.1843e-05	0.000141008	0.01972
						199.741	6.27616e-05	0.00014317	0.01991
						199.749	6.36932e-05	0.000145364	0.0201
						199.757	6.46379e-05	0.00014759	0.02029
						199.765	6.55959e-05	0.000149848	0.02049
						199.773	6.65673e-05	0.000152138	0.02068
						199.781	6.75524e-05	0.000154462	0.02088
						199.789	6.85513e-05	0.000156819	0.02108
						199.797	6.95641e-05	0.00015921	0.02128
						199.805	7.05912e-05	0.000161636	0.02149
						199.813	7.16327e-05	0.000164096	0.02169
						199.821	7.26887e-05	0.000166592	0.0219
						199.829	7.37595e-05	0.000169124	0.02211
						199.837	7.48452e-05	0.000171692	0.02232
						199.845	7.59461e-05	0.000174298	0.02253
						199.853	7.70623e-05	0.00017694	0.02274
						199.861	7.8194e-05	0.00017962	0.02296
						199.869	7.93416e-05	0.000182339	0.02317
						199.877	8.0505e-05	0.000185096	0.02339
						199.886	8.16847e-05	0.000187893	0.02361
						199.894	8.28807e-05	0.00019073	0.02383
						199.902	8.40933e-05	0.000193607	0.02406
						199.91	8.53227e-05	0.000196526	0.02428
						199.918	8.65692e-05	0.000199485	0.02451
						199.926	8.78329e-05	0.000202487	0.02474
						199.934	8.91141e-05	0.000205532	0.02497
						199.942	9.0413e-05	0.00020862	0.02521
						199.95	9.17298e-05	0.000211751	0.02544
						199.958	9.30648e-05	0.000214927	0.02568
[truncated: 18,002 more rows]

## Sheet: Figure_5
a)	lambda [nm]	Na2(C2HO3)+	Na3(C2HO3)+	Total	Noise		b)	lambda [nm]	Na2(C2HO3)+	Na3(C2HO3)2+	Total	Noise		c)	lambda [nm]	Na2(C2HO3)+	Na3(C2HO3)2+	Na3(C2HO3)2(H2O)+	Total	Noise		d)	lambda [nm]	Ba	Bb		e)	lambda [nm]	Ca	Cb		f)	lambda [nm]	Da	Db	Dc	Dd
	224.828	5.16128	0.66005	5.82133	0.57472			224.927	5.07786	0.62036	5.69822	0.31438			224.92	4.0289	0.78493	0	4.81382	0.24035			164.377	0.10634	1.14448e-07			138.436	3.47688e-07	1.02426e-07			140.353	4.4327e-05	1.12518e-07	1.20901e-06	3.76221e-05
	227.826	3.13677	0	3.13677	0.47579			225.906	5.48296	0.81784	6.3008	0.36209			226.1	5.24847	0.88496	0.17519	6.30862	0.31355			164.674	0.11545	2.30312e-07			138.646	4.09091e-07	1.23252e-07			140.569	4.85076e-05	1.35851e-07	1.43613e-06	4.52163e-05
	230.8	3.11386	0.56488	3.67874	0.4044			226.886	4.95697	0.70039	5.65736	0.23541			226.905	2.57509	0.53136	0.11165	3.2181	0.17583			164.971	0.12536	4.57553e-07			138.857	4.80859e-07	1.48143e-07			140.786	5.30424e-05	1.63881e-07	1.70474e-06	5.44163e-05
	233.82	3.40909	0.43222	3.84131	0.35902			227.912	3.56154	0.47771	4.03925	0.22626			227.911	2.53199	0.41427	0.13438	3.08065	0.19157			165.27	0.13621	8.97379e-07			139.069	5.64645e-07	1.77852e-07			141.003	5.79564e-05	1.97518e-07	2.02218e-06	6.55655e-05
	236.821	3.89721	0.33989	4.2371	0.33938			228.863	4.98548	0.6022	5.58768	0.31455			228.871	4.0165	0.77811	0.15223	4.94685	0.26863			165.57	0.14815	1.73753e-06			139.281	6.62368e-07	2.13271e-07			141.222	6.32774e-05	2.37846e-07	2.39708e-06	7.90817e-05
	239.883	4.34864	0.46468	4.81332	0.35793			229.894	4.02723	0.42212	4.44935	0.29972			229.898	3.85546	0.64274	0	4.4982	0.30368			165.871	0.16138	3.32103e-06			139.494	7.76227e-07	2.55447e-07			141.441	6.90342e-05	2.8615e-07	2.83951e-06	9.547e-05
	242.904	2.07872	0	2.07872	0.31552			230.873	6.01825	0.74762	6.76586	0.34217			230.869	4.69416	0.89292	0.18259	5.76966	0.31077			166.173	0.17614	6.26631e-06			139.708	9.08751e-07	3.05608e-07			141.66	7.52572e-05	3.43953e-07	3.36128e-06	0.000115341
	245.909	2.95415	0	2.95415	0.37176			231.883	4.56454	0.66189	5.22644	0.32064			231.887	4.18405	0.89468	0.17326	5.25198	0.30391			166.477	0.19274	1.16721e-05			139.922	1.06285e-06	3.65199e-07			141.88	8.1979e-05	4.13059e-07	3.9762e-06	0.000139435
	248.892	1.85146	0	1.85146	0.34282			232.906	4.14963	0.42838	4.57801	0.2586			232.907	2.0874	0.29518	0.12644	2.50901	0.1908			166.781	0.21156	2.14625e-05			140.137	1.24183e-06	4.35899e-07			142.101	8.92325e-05	4.95588e-07	4.70032e-06	0.000168638
	251.884	2.28933	0	2.28933	0.4157			233.891	4.14302	0.43281	4.57582	0.25737			233.891	2.27401	0.35646	0.14811	2.77858	0.22649			167.086	0.23307	3.89601e-05			140.353	1.44951e-06	5.19684e-07			142.323	9.70537e-05	5.94055e-07	5.55244e-06	0.000204024
	254.885	2.34178	0	2.34178	0.3622			234.891	3.89774	0.47489	4.37263	0.24678			234.902	2.05484	0.46705	0	2.52188	0.22636			167.393	0.25787	6.98135e-05			140.569	1.69023e-06	6.18855e-07			142.546	0.00010548	7.1142e-07	6.55445e-06	0.000246882
	257.885	1.94343	0	1.94343	0.38996			235.881	3.86458	0.48933	4.35391	0.23242			236	2.0337	0.41344	0	2.44714	0.20596			167.701	0.28667	0.000123495			140.786	1.969e-06	7.36105e-07			142.769	0.00011455	8.5117e-07	7.73184e-06	0.000298762
	260.881	1.32851	0	1.32851	0.35406			236.897	3.0215	0.33284	3.35434	0.20878			237	2.08148	0.45379	0.12097	2.65623	0.21206			168.009	0.32037	0.000215652			141.003	2.29146e-06	8.74548e-07			142.992	0.000124307	1.01741e-06	9.11436e-06	0.000361526
	263.868	1.04989	0	1.04989	0.38075			237.919	2.976	0.41737	3.39336	0.16722			238	2.25414	0.48137	0	2.73551	0.20502			168.319	0.36004	0.000371749			141.222	2.66408e-06	1.03783e-06			143.217	0.00013479	1.21495e-06	1.07363e-05	0.000437394
	266.866	1.30943	0	1.30943	0.38606			238.916	3.19387	0.37416	3.56803	0.18538			239	2.16409	0.42984	0.14498	2.73891	0.19195			168.631	0.40702	0.00063263			141.441	3.09424e-06	1.23016e-06			143.442	0.000146047	1.44944e-06	1.26378e-05	0.000529033
	269.865	1.55878	0	1.55878	0.27011			239.952	2.99682	0.40523	3.40205	0.18863			239.953	1.97577	0.42178	0	2.39755	0.1829			168.943	0.4629	0.00106			141.66	3.59032e-06	1.45646e-06			143.668	0.000158123	1.72749e-06	1.48653e-05	0.000639624
	272.866	1.31663	0	1.31663	0.39369			244.954	2.66606	0.35022	3.01628	0.16223			241	1.97505	0.37949	0	2.35454	0.1832			169.256	0.52959	0.00176			141.88	4.16185e-06	1.72242e-06			143.895	0.000171069	2.0569e-06	1.74727e-05	0.000772968
	275.884	0.94312	0	0.94312	0.4551			249.921	2.58867	0.34123	2.9299	0.14534			242	1.82286	0.35209	0	2.17495	0.15616			169.571	0.6094	0.00289			142.101	4.81958e-06	2.03456e-06			144.122	0.000184933	2.44666e-06	2.0522e-05	0.000933567
	278.897	0.78385	0	0.78385	0.31853			254.946	2.15442	0.26461	2.41903	0.14435			243	1.99776	0.34267	0	2.34043	0.19752			169.887	0.70504	0.00466			142.323	5.57577e-06	2.40051e-06			144.35	0.00019977	2.90737e-06	2.40854e-05	0.00113
	281.864	0.63485	0	0.63485	0.36464			259.915	1.86446	0.18488	2.04933	0.15022			244	1.754	0.27049	0	2.02448	0.18944			170.204	0.8197	0.00744			142.546	6.44429e-06	2.82901e-06			144.579	0.000215633	3.45137e-06	2.82461e-05	0.00136
	284.85	0.93314	0	0.93314	0.51813			264.925	1.17074	0.12435	1.29509	0.1301			244.954	1.83684	0.34774	0	2.18458	0.17038			170.522	0.95708	0.01171			142.769	7.44079e-06	3.33015e-06			144.808	0.000232581	4.09299e-06	3.31001e-05	0.00164
	287.854	0.77175	0	0.77175	0.70577			269.926	1.07526	0.14679	1.22204	0.11747			246	1.81122	0.32996	0.12275	2.26393	0.18098			170.841	1.12141	0.01821			142.992	8.58306e-06	3.9156e-06			145.038	0.000250674	4.84899e-06	3.87583e-05	0.00197
	290.852	1e-05	1e-05	0.99998	0.65894			274.928	0.4242	0	0.4242	0.13689			247	1.48966	0.29369	0	1.78335	0.14503			171.162	1.31745	0.02794			143.217	9.89093e-06	4.59862e-06			145.269	0.00026997	5.73866e-06	4.53474e-05	0.00237
	293.8	1e-05	1e-05	0.99998	0.56571			279.936	0.75633	0	0.75633	0.17154			248	1.36081	0.31676	0	1.67757	0.14554			171.483	1.55046	0.04234			143.442	1.1387e-05	5.39459e-06			145.501	0.000290536	6.78451e-06	5.30141e-05	0.00285
	296.902	0.64994	0	0.64994	0.22666			284.886	0.4081	0	0.4081	0.1199			249	1.77051	0.35268	0	2.12319	0.15289			171.806	1.82607	0.06331			143.668	1.30965e-05	6.32106e-06			145.733	0.000312437	8.01258e-06	6.19265e-05	0.00342
	299.912	0.92407	0	0.92407	0.24438			289.857	0.38691	0	0.38691	0.14121			249.916	1.56849	0.31304	0	1.88153	0.14693			172.13	2.15022	0.09347			143.895	1.50482e-05	7.39821e-06			145.967	0.000335744	9.45307e-06	7.22782e-05	0.0041
	302.851	1.02919	0	1.02919	0.1478			294.875	0.64795	0	0.64795	0.19072			254.941	1.44379	0.33281	0	1.7766	0.14482			172.456	2.52892	0.13622			144.122	1.72739e-05	8.6489e-06			146.201	0.000360525	1.11406e-05	8.42886e-05	0.00492
	305.879	0.5416	0	0.5416	0.15236			300	0.12393	0	0.12393	0.07331			259.914	0.91526	0.22909	0.10241	1.24676	0.16872			172.782	2.96798	0.19597			144.35	1.98095e-05	1.00995e-05			146.435	0.000386857	1.31154e-05	9.8211e-05	0.00588
	308.881	0.993	0	0.993	0.17464			305	0.16602	0	0.16602	0.05625			264.92	0.78211	0.14683	0.08663	1.01556	0.13622			173.11	3.47259	0.27831			144.579	2.26953e-05	1.17798e-05			146.671	0.000414818	1.54235e-05	0.000114334	0.00703
	311.877	1.0658	0	1.0658	0.14714			310	0.18921	0	0.18921	0.05075			269.917	0.64405	0.29583	0	0.93988	0.15124			173.439	4.04709	0.39017			144.808	2.59764e-05	1.3724e-05			146.907	0.00044449	1.81183e-05	0.000132987	0.00839
	314.87	1.22394	0	1.22394	0.30205			314.916	0.16619	0	0.16619	0.03974			274.923	0.26187	0	0	0.26187	0.15077			173.77	4.69437	0.53997			145.038	2.97034e-05	1.5971e-05			147.144	0.000475962	2.12609e-05	0.000154546	0.01001
	317.809	0.94341	0	0.94341	0.12686			319.862	0.17784	0	0.17784	0.04316			279.927	0.41612	0	0	0.41612	0.24639			174.101	5.41551	0.73769			145.269	3.39321e-05	1.85645e-05			147.381	0.000509323	2.49209e-05	0.000179436	0.01191
	320.818	0.70423	0	0.70423	0.13043			324.874	0.24726	0	0.24726	0.05405			284.879	0.36151	0.20347	0	0.56498	0.15407			174.434	6.20932	0.99489			145.501	3.87257e-05	2.15545e-05			147.62	0.000544673	2.91788e-05	0.000208142	0.01417
	323.828	0.92907	0	0.92907	0.13389			329.908	0.16136	0	0.16136	0.04843			289.853	0.45059	0	0	0.45059	0.40287			174.768	7.07181	1.32451			145.733	4.4154e-05	2.49977e-05			147.859	0.000582118	3.41261e-05	0.000241215	0.01682
	326.798	1.12841	0	1.12841	0.15681			334.95	0.31855	0	0.31855	0.04062			294.852	0.45686	0	0	0.45686	0.25255			175.104	7.99618	1.7407			145.967	5.02954e-05	2.89582e-05			148.099	0.000621775	3.98676e-05	0.000279278	0.01995
	329.852	0.81222	0	0.81222	0.1254			339.914	0.37971	0	0.37971	0.04092			300	0.1055	0	0	0.1055	0.10007			175.441	8.97248	2.25829			146.201	5.72358e-05	3.35079e-05			148.34	0.000663775	4.65232e-05	0.000323038	0.02363
	332.889	1.35542	0	1.35542	0.14543			344.924	0.42246	0	0.42246	0.04572			305	0.04958	0	0.05306	0.10264	0.07189			175.779	9.98775	2.89217			146.435	6.50717e-05	3.87284e-05			148.582	0.000708254	5.42279e-05	0.000373285	0.02794
	335.897	1.97445	0	1.97445	0.16033			349.918	0.73915	0.09273	0.83188	0.04031			310	0.08525	0	0	0.08525	0.06125			176.118	11.0263	3.65646			146.671	7.39099e-05	4.47117e-05			148.824	0.000755378	6.31366e-05	0.000430919	0.033
	338.88	1.56718	0	1.56718	0.1466			354.895	0.60161	0.06803	0.66964	0.06179			314.916	0.07842	0	0	0.07842	0.05928			176.459	12.07	4.5633			146.907	8.38686e-05	5.1561e-05			149.067	0.00080533	7.34247e-05	0.000496951	0.03892
	341.866	1.00306	0	1.00306	0.22048			359.927	0.23679	0.0785	0.31529	0.04233			319.86	0.08733	0	0	0.08733	0.05189			176.801	13.0991	5.62194			147.144	9.50796e-05	5.9393e-05			149.311	0.000858324	8.52919e-05	0.000572521	0.04583
	344.868	0.95593	0	0.95593	0.16994			364.891	0.23235	0.1231	0.35545	0.0475			324.871	0.14097	0.07645	0	0.21742	0.06682			177.144	14.0933	6.83725			147.381	0.000107686	6.83371e-05			149.556	0.000914602	9.89615e-05	0.000658892	0.0539
	347.867	0.80054	0	0.80054	0.20586			369.917	0.08039	0.08419	0.16458	0.03644			329.902	0.12343	0.07777	0	0.2012	0.06329			177.489	15.032	8.20859			147.62	0.000121849	7.85398e-05			149.802	0.000974458	0.000114689	0.000757497	0.06329
	350.868	1.34854	0	1.34854	0.1562			374.864	0.0586	0.06891	0.12751	0.05487			334.941	0.09031	0	0	0.09031	0.04948			177.835	15.8961	9.72836			147.859	0.000137744	9.01645e-05			150.048	0.00104	0.00013276	0.000869932	0.07421
	353.854	0.80218	0	0.80218	0.14223			379.877	0.06451	0.07965	0.14417	0.05775			339.912	0.27726	0.08746	0	0.36473	0.05188			178.182	16.6682	11.3815			148.099	0.000155566	0.000103394			150.295	0.00111	0.000153498	0.000997979	0.08689
	356.875	0.45994	0	0.45994	0.11515			384.887	0.03893	0.04698	0.08591	0.0615			344.919	0.32482	0.10738	0	0.4322	0.05533			178.531	17.3341	13.1446			148.34	0.00017553	0.000118433			150.543	0.00118	0.000177268	0.00114	0.10159
	359.872	0.28944	0	0.28944	0.14234			389.845	0.05914	0.09733	0.15647	0.07473			349.913	0.20822	0.08042	0	0.28864	0.04167			178.881	17.883	14.986			148.582	0.000197869	0.000135507			150.792	0.00126	0.000204474	0.00131	0.11859
	362.872	0.26175	0	0.26175	0.11187			394.891	0.02609	0.02999	0.05608	0.06073			354.891	0.37148	0.11361	0	0.48508	0.06179			179.232	18.3082	16.8661			148.824	0.000222842	0.00015487			151.042	0.00134	0.000235576	0.0015	0.13824
	365.866	0.13514	0	0.13514	0.12707			400	0.04347	0.12795	0.17141	0.06754			359.923	0.08542	0.04958	0	0.135	0.04346			179.585	18.6069	18.7385			149.067	0.000250731	0.000176804			151.292	0.00143	0.000271084	0.00171	0.16091
	368.864	--	--	0	0.13326										364.886	0.12869	0.05216	0	0.18085	0.04866			179.939	18.7804	20.5515			149.311	0.00028185	0.000201622			151.543	0.00153	0.00031157	0.00195	0.187
	371.838	--	--	0	0.18754										369.913	0.12345	0	0	0.12345	0.03802			180.295	18.8339	22.2509			149.556	0.000316534	0.000229668			151.796	0.00164	0.000357675	0.00222	0.21701
	374.81	--	--	0	0.23705										374.854	0.05227	0	0	0.05227	0.05103			180.652	18.7755	23.782			149.802	0.000355156	0.000261327			152.049	0.00176	0.000410103	0.00253	0.25146
	377.801	--	--	0	0.14223										379.869	0.01399	0	0	0.01399	0.05681			181.01	18.6158	25.0926			150.048	0.00039812	0.000297024			152.302	0.00189	0.000469645	0.00288	0.29092
	380.822	--	--	0	0.29415										384.882	0.01085	0	0	0.01085	0.05639			181.37	18.3671	26.1362			150.295	0.000445869	0.000337228			152.557	0.00204	0.000537177	0.00326	0.33608
	383.846	--	--	0	0.27626										384.887	0.01018	0	0	0.01018	0.0558			181.731	18.0428	26.8748			150.543	0.000498888	0.000382457			152.813	0.00221	0.000613676	0.0037	0.38766
	386.856	--	--	0	0.62649										389.845	--	--	--	0	0.07039			182.094	17.6563	27.2809			150.792	0.000557692	0.000433278			153.069	0.00239	0.000700204	0.00419	0.44647
	389.792	--	--	0	0.4081										394.891	0.0105	0	0	0.0105	0.05796			182.458	17.2206	27.3395			151.042	0.000622854	0.000490318			153.326	0.00261	0.000797952	0.00474	0.51343
															400	0.00658	0	0	0.00658	0.06095			182.824	16.7482	27.0489			151.292	0.000694992	0.000554268			153.584	0.00285	0.000908225	0.00536	0.58952
																							183.191	16.2501	26.4211			151.543	0.000774774	0.000625882			153.843	0.00313	0.00103	0.00605	0.67586
																							183.56	15.7361	25.4806			151.796	0.000862932	0.000705995			154.103	0.00345	0.00117	0.00682	0.77367
																							183.93	15.2147	24.2634			152.049	0.000960239	0.000795504			154.364	0.00382	0.00133	0.00768	0.88427
																							184.301	14.6929	22.8144			152.302	0.00107	0.000895406			154.626	0.00425	0.00151	0.00863	1.00913
																							184.674	14.1766	21.1848			152.557	0.00119	0.00101			154.888	0.00475	0.0017	0.00969	1.14987
																							185.049	13.6705	19.4296			152.813	0.00132	0.00113			155.152	0.00534	0.00192	0.01087	1.30823
																							185.425	13.1786	17.6038			153.069	0.00146	0.00127			155.416	0.00603	0.00217	0.01217	1.48611
																							185.803	12.704	15.7606			153.326	0.00162	0.00142			155.681	0.00685	0.00245	0.01361	1.6856
																							186.182	12.2492	13.9484			153.584	0.00179	0.00159			155.947	0.0078	0.00275	0.01521	1.90893
																							186.563	11.8162	12.2092			153.843	0.00198	0.00178			156.214	0.00893	0.00309	0.01696	2.15853
																							186.945	11.4065	10.5775			154.103	0.00219	0.00199			156.482	0.01027	0.00347	0.0189	2.43706
																							187.329	11.0214	9.07915			154.364	0.00241	0.00222			156.751	0.01184	0.0039	0.02103	2.74729
																							187.714	10.6617	7.73196			154.626	0.00266	0.00248			157.021	0.01369	0.00436	0.02336	3.09228
																							188.101	10.3278	6.54559			154.888	0.00293	0.00276			157.292	0.01588	0.00488	0.02593	1.18803e-05
																							188.49	10.0199	5.5227			155.152	0.00323	0.00307			157.563	0.01846	0.00545	0.02873	3.47527
																							188.88	9.73778	4.65985			155.416	0.00355	0.00341			157.836	0.0215	0.00608	0.0318	1.88096e-05
																							189.272	9.48103	3.94891			155.681	0.0039	0.00379			158.109	0.02507	0.00678	0.03515	3.89975
																							189.666	9.2489	3.37818			155.947	0.00428	0.0042			158.384	0.02927	0.00754	0.0388	2.96406e-05
																							190.061	9.0404	2.9337			156.214	0.0047	0.00466			158.659	0.0342	0.00838	0.04277	4.36943
																							190.458	8.8544	2.60031			156.482	0.00515	0.00516			158.936	0.03998	0.0093	0.04709	4.64717e-05
																							190.856	8.68956	2.36252			156.751	0.00564	0.00571			159.213	0.04674	0.01031	0.05177	4.88822
																							191.256	8.54449	2.20527			157.021	0.00617	0.00631			159.492	0.05464	0.01142	0.05685	7.24757e-05
																							191.658	8.41771	2.11439			157.292	0.00674	0.00697			159.771	0.06386	0.01263	0.06235	5.46031
																							192.061	8.30773	2.07699			157.563	0.00736	0.00768			160.051	0.0746	0.01395	0.0683	0.000112413
																							192.467	8.21308	2.08158			157.836	0.00803	0.00847			160.332	0.08709	0.01539	0.07474	6.09014
																							192.873	8.13234	2.11814			158.109	0.00876	0.00933			160.615	0.10157	0.01696	0.08168	0.000173383
																							193.282	8.06415	2.1781			158.384	0.00954	0.01026			160.898	0.11834	0.01867	0.08919	6.78243
																							193.692	8.00721	2.25424			158.659	0.01039	0.01128			161.182	0.1377	0.02052	0.09729	0.000265885
																							194.105	7.96034	2.34053			158.936	0.0113	0.01239			161.468	0.16003	0.02254	0.10606	7.54202
																							194.518	7.92239	2.43202			159.213	0.01228	0.01361			161.754	0.1857	0.02472	0.11555	0.000405367
																							194.934	7.89233	2.52467			159.492	0.01333	0.01493			162.041	0.21514	0.02709	0.12586	8.37413
																							195.351	7.86917	2.61525			159.771	0.01447	0.01638			162.329	0.24883	0.02965	0.1371	0.000614386
																							195.771	7.85196	2.7012			160.051	0.01568	0.01796			162.619	0.28727	0.03241	0.14942	9.28421
																							196.192	7.83983	2.78054			160.332	0.01699	0.0197			162.909	0.33101	0.0354	0.16302	0.000925656
																							196.615	7.83189	2.85182			160.615	0.01839	0.02161			163.201	0.38063	0.03863	0.17815	10.278
																							197.039	7.8273	2.91406			160.898	0.01989	0.02372			163.493	0.43676	0.04212	0.19516	0.00139
																							197.466	7.82522	2.96668			161.182	0.0215	0.02607			163.787	0.50005	0.04588	0.2145	11.3613
																							197.894	7.82483	3.0095			161.468	0.02322	0.02869			164.081	0.57118	0.04994	0.23676	0.00206
																							198.324	7.82529	3.04269			161.754	0.02507	0.03163			164.377	0.65087	0.05432	0.26272	12.5405
																							198.756	7.82577	3.06678			162.041	0.02705	0.03497			164.674	0.73982	0.05903	0.29336	0.00305
																							199.19	7.82546	3.08258			162.329	0.02916	0.03879			164.971	0.83876	0.06412	0.32994	13.8219
																							199.626	7.82354	3.09122			162.619	0.03143	0.04321			165.27	0.9484	0.06961	0.37404	0.00449
																							200.064	7.81921	3.0941			162.909	0.03386	0.04836			165.57	1.06944	0.07554	0.42762	15.2122
																							200.504	7.81171	3.09283			163.201	0.03647	0.05443			165.871	1.20254	0.08194	0.49306	0.00657
																							200.945	7.8003	3.08924			163.493	0.03927	0.06165			166.173	1.34829	0.08886	0.5732	16.7186
																							201.389	7.78428	3.08535			163.787	0.04228	0.07031			166.477	1.50725	0.09633	0.67142	0.00954
																							201.834	7.763	3.08326			164.081	0.04552	0.08076			166.781	1.67986	0.10443	0.79162	18.3479
																							202.282	7.73587	3.0852			164.377	0.04901	0.09345			167.086	1.86649	0.11319	0.93822	0.01377
																							202.731	7.70236	3.09343			164.674	0.05279	0.10892			167.393	2.06734	0.1227	1.1161	20.1076
																							203.183	7.66202	3.11021			164.971	0.05689	0.12783			167.701	2.2825	0.13301	1.33058	0.01977
																							203.636	7.61444	3.13776			165.27	0.06134	0.15096			168.009	2.51188	0.14422	1.58722	22.0056
																							204.092	7.55934	3.17825			165.57	0.0662	0.17926			168.319	2.75523	0.1564	1.89167	0.0282
																							204.55	7.49647	3.23369			165.871	0.07151	0.21383			168.631	3.01213	0.16965	2.24945	24.0495
																							205.009	7.42569	3.30598			166.173	0.07734	0.25594			168.943	3.28187	0.18407	2.66558	0.03999
																							205.471	7.34693	3.3968			166.477	0.08376	0.30707			169.256	3.56363	0.19978	3.14432	26.2478
																							205.935	7.26019	3.50766			166.781	0.09086	0.3689			169.571	3.85632	0.21689	3.68881	0.05635
																							206.401	7.16555	3.63981			167.086	0.09873	0.44329			169.887	4.15866	0.23553	4.30065	28.6085
																							206.869	7.06316	3.79427			167.393	0.10749	0.53231			170.204	4.46912	0.25583	4.97942	0.07893
																							207.339	6.95324	3.97177			167.701	0.11727	0.6382			170.522	4.786	0.27793	5.72254	31.1402
																							207.811	6.83608	4.1728			168.009	0.12822	0.76337			170.841	5.10741	0.30198	6.52486	0.10988
																							208.286	6.712	4.39753			168.319	0.1405	0.91036			171.162	5.43129	0.32811	7.37849	33.8518
																							208.762	6.58141	4.64587			168.631	0.1543	1.08176			171.483	5.75544	0.35648	8.27284	0.15204
																							209.241	6.44474	4.91744			168.943	0.16984	1.2802			171.806	6.07751	0.38722	9.19443	36.7524
																							209.722	6.30248	5.21157			169.256	0.18734	1.50823			172.13	6.3951	0.42049	10.1275	0.2091
																							210.205	6.15513	5.52734			169.571	0.20706	1.7683			172.456	6.70577	0.4564	11.0543	39.8514
																							210.691	6.00326	5.86353			169.887	0.22929	2.06262			172.782	7.00706	0.49509	11.9554	0.28582
																							211.179	5.84743	6.21869			170.204	0.25433	2.39302			173.11	7.29651	0.53665	12.8107	43.1578
																							211.669	5.68824	6.5911			170.522	0.28249	2.76096			173.439	7.57176	0.58118	13.6003	0.38831
																							212.161	5.5263	6.97885			170.841	0.31413	3.16734			173.77	7.83057	0.62874	14.3048	46.6817
																							212.655	5.36223	7.37977			171.162	0.3496	3.61242			174.101	8.07082	0.67937	14.9069	0.52435
																							213.152	5.19667	7.79151			171.483	0.38928	4.09576			174.434	8.29059	0.73307	15.3918	50.4328
																							213.651	5.03023	8.21159			171.806	0.43355	4.61602			174.768	8.48815	0.78982	15.7477	0.70378
																							214.153	4.86355	8.63729			172.13	0.4828	5.17109			175.104	8.66203	0.84955	15.9668	54.4216
																							214.657	4.69722	9.06583			172.456	0.5374	5.75794			175.441	8.81103	0.91216	16.0455	0.93886
																							215.163	4.53188	9.49428			172.782	0.59772	6.37263			175.779	8.93421	0.9775	15.9845	58.6579
																							215.672	4.36809	9.91966			173.11	0.6641	7.01028			176.118	9.03094	1.04536	15.7885	1.24489
																							216.183	4.20643	10.3389			173.439	0.73687	7.66523			176.459	9.10085	1.11551	15.4664	63.1526
																							216.696	4.04743	10.7489			173.77	0.81628	8.33109			176.801	9.1439	1.18766	15.0303	1.64069
																							217.212	3.89161	11.1467			174.101	0.90256	9.00081			177.144	9.16031	1.26147	14.4951	67.9161
																							217.731	3.73946	11.5291			174.434	0.99588	9.66693			177.489	9.15059	1.33658	13.8778	2.14925
																							218.252	3.59141	11.8932			174.768	1.0963	10.3216			177.835	9.1155	1.41254	13.1964	72.9593
																							218.775	3.4479	12.2361			175.104	1.20382	10.9568			178.182	9.05602	1.48891	12.4696	2.79851
																							219.301	3.30928	12.5551			175.441	1.31835	11.5648			178.531	8.97335	1.56521	11.7152	78.2934
																							219.829	3.17591	12.8476			175.779	1.43969	12.1382			178.881	8.86887	1.64092	10.9502	3.62186
																							220.36	3.04805	13.1111			176.118	1.56753	12.6699			179.232	8.7441	1.71553	10.1898	83.9285
																							220.894	2.92597	13.3435			176.459	1.70143	13.1536			179.585	8.60072	1.78849	9.44733	4.65921
																							221.43	2.80988	13.5429			176.801	1.84084	13.584			179.939	8.44044	1.85927	8.73358	89.8758
																							221.969	2.69991	13.7074			177.144	1.9851	13.9568			180.295	8.2651	1.92736	8.05698	5.95758
																							222.51	2.59621	13.8358			177.489	2.13342	14.2691			180.652	8.0765	1.99225	7.4235	96.146
																							223.054	2.49883	13.9268			177.835	2.28489	14.5188			181.01	7.87653	2.05347	6.83699	7.57196
																							223.601	2.40781	13.9798			178.182	2.43851	14.7056			181.37	7.66703	2.1106	6.29915	102.749
																							224.15	2.32312	13.9942			178.531	2.59318	14.8303			181.731	7.44979	2.16324	5.81001	9.5661
																							224.702	2.24473	13.9699			178.881	2.74773	14.895			182.094	7.22658	2.2111	5.3682	109.696
																							225.257	2.17253	13.9071			179.232	2.90091	14.9029			182.458	6.99909	2.25391	4.97128	12.0127
																							225.815	2.10639	13.8062			179.585	3.05143	14.8583			182.824	6.76898	2.29149	4.61615	116.995
																							226.375	2.04615	13.6682			179.939	3.19798	14.7662			183.191	6.53776	2.32374	4.29919	14.9946
																							226.938	1.99161	13.494			180.295	3.33928	14.6326			183.56	6.30691	2.35066	4.01664	124.656
																							227.504	1.94256	13.2851			180.652	3.47405	14.4634			183.93	6.07779	2.37229	3.76474	18.6045
																							228.073	1.89873	13.0433			181.01	3.60106	14.2649			184.301	5.85169	2.38881	3.5399	132.685
																							228.644	1.85985	12.7704			181.37	3.71917	14.0434			184.674	5.62979	2.40044	3.33878	22.9456
																							229.219	1.82564	12.4685			181.731	3.82734	13.8046			185.049	5.41321	2.40751	3.1584	141.091
																							229.796	1.79577	12.1401			182.094	3.92466	13.5538			185.425	5.20295	2.41041	2.99612	28.13
																							230.377	1.76992	11.7875			182.458	4.01036	13.2954			185.803	4.99996	2.40963	2.84968	149.877
																							230.96	1.74776	11.4135			182.824	4.08384	13.0332			186.182	4.80508	2.40569	2.71713	34.2796
																							231.546	1.72894	11.0207			183.191	4.14467	12.7699			186.563	4.61913	2.39919	2.59686	159.047
																							232.135	1.71312	10.6119			183.56	4.19262	12.507			186.945	4.4428	2.39078	2.48752	41.5243
																							232.727	1.69994	10.19			183.93	4.22764	12.2453			187.329	4.27674	2.38112	2.38796	168.604
																							233.323	1.68907	9.75777			184.301	4.24991	11.9846			187.714	4.12154	2.37093	2.29725	49.9999
																							233.921	1.68014	9.31794			184.674	4.25977	11.724			188.101	3.97773	2.36094	2.2146	178.545
																							234.522	1.67283	8.87329			185.049	4.25777	11.4619			188.49	3.84578	2.35187	2.13932	59.8472
																							235.127	1.66681	8.42644			185.425	4.24464	11.1963			188.88	3.72609	2.34446	2.07083	188.869
																							235.734	1.66176	7.97992			185.803	4.22127	10.9252			189.272	3.61903	2.33941	2.00861	71.2063
																							236.345	1.65737	7.53611			186.182	4.18869	10.6465			189.666	3.5249	2.33743	1.9522	199.567
																							236.959	1.65335	7.09728			186.563	4.14807	10.3583			190.061	3.44396	2.33917	1.90116	84.217
																							237.576	1.64942	6.66547			186.945	4.10069	10.0594			190.458	3.37643	2.34526	1.85512	210.632
																							238.196	1.64533	6.2426			187.329	4.04788	9.74875			190.856	3.32246	2.35627	1.81372	99.0122
																							238.82	1.64083	5.83036			187.714	3.99106	9.42644			191.256	3.28216	2.37273	1.77663	222.049
																							239.447	1.63571	5.43026			188.101	3.93164	9.09301			191.658	3.2556	2.39511	1.74354	115.715
																							240.077	1.62976	5.04362			188.49	3.87107	8.74989			192.061	3.24281	2.42384	1.71416	233.802
																							240.71	1.6228	4.67152			188.88	3.81075	8.39915			192.467	3.24378	2.45926	1.68825	134.431
																							241.347	1.61467	4.31491			189.272	3.75204	8.04351			192.873	3.25843	2.50166	1.66557	245.868
																							241.987	1.60524	3.97449			189.666	3.69625	7.68621			193.282	3.28667	2.55128	1.64591	155.246
																							242.631	1.59438	3.6508			190.061	3.64459	7.33078			193.692	3.32837	2.60829	1.62907	258.223
																							243.278	1.582	3.34421			190.458	3.59818	6.98101			194.105	3.38334	2.67277	1.61489	178.22
																							243.928	1.56802	3.05488			190.856	3.55801	6.64064			194.518	3.45139	2.7448	1.60321	270.835
																							244.582	1.55238	2.78289			191.256	3.52497	6.31331			194.934	3.53226	2.82434	1.59391	203.378
																							245.24	1.53505	2.5281			191.658	3.4998	6.00232			195.351	3.62568	2.91134	1.58688	283.669
																							245.901	1.51601	2.29032			192.061	3.48313	5.71057			195.771	3.73135	3.00567	1.582	230.711
																							246.565	1.49526	2.06917			192.467	3.47542	5.44044			196.192	3.84894	3.10715	1.5792	296.685
																							247.233	1.47281	1.86424			192.873	3.47704	5.19368			196.615	3.97808	3.21558	1.57839	260.163
																							247.905	1.4487	1.67498			193.282	3.4882	4.97145			197.039	4.11839	3.33068	1.57953	309.836
																							248.581	1.42296	1.50081			193.692	3.50901	4.77425			197.466	4.26945	3.45214	1.58254	291.633
																							249.26	1.39567	1.34106			194.105	3.53943	4.60201			197.894	4.43083	3.57962	1.58738	323.073
																							249.943	1.3669	1.19503			194.518	3.57935	4.45407			198.324	4.60207	3.71273	1.59401	324.97
																							250.63	1.33672	1.06201			194.934	3.62855	4.32928			198.756	4.78268	3.85106	1.6024	336.339
																							251.32	1.30523	0.94122			195.351	3.68672	4.22608			199.19	4.97215	3.99415	1.61251	359.97
																							252.014	1.27254	0.83191			195.771	3.75346	4.14261			199.626	5.16997	4.14153	1.62431	349.575
																							252.712	1.23875	0.73331			196.192	3.82833	4.07673			200.064	5.37558	4.29268	1.63778	396.374
																							253.414	1.20398	0.64466			196.615	3.91083	4.0262			200.504	5.58841	4.44709	1.6529	362.718
																							254.12	1.16834	0.56521			197.039	4.0004	3.9887			200.945	5.80785	4.60419	1.66964	433.867
																							254.83	1.13197	0.49424			197.466	4.09645	3.96189			201.389	6.03332	4.76341	1.68797	375.696
																							255.544	1.09499	0.43105			197.894	4.19837	3.94356			201.834	6.26416	4.92416	1.70789	472.087
																							256.262	1.05751	0.37496			198.324	4.30552	3.93157			202.282	6.49973	5.08584	1.72936	388.44
																							256.983	1.01969	0.32533			198.756	4.41725	3.92396			202.731	6.73935	5.24783	1.75237	510.623
																							257.709	0.98162	0.28155			199.19	4.53291	3.91898			203.183	6.98233	5.40952	1.77689	400.874
																							258.439	0.94345	0.24306			199.626	4.65185	3.91507			203.636	7.22797	5.57026	1.8029	549.026
																							259.174	0.90529	0.20932			200.064	4.77342	3.91088			204.092	7.47552	5.72944	1.83036	412.923
																							259.912	0.86726	0.17984			200.504	4.89697	3.90528			204.55	7.72427	5.88641	1.85925	586.805
																							260.655	0.82947	0.15416			200.945	5.02187	3.89736			205.009	7.97343	6.04056	1.88952	424.507
																							261.402	0.79202	0.13185			201.389	5.14751	3.8864			205.471	8.22227	6.19125	1.92115	623.455
																							262.153	0.75503	0.11254			201.834	5.27328	3.87185			205.935	8.47	6.3379	1.95409	435.547
																							262.908	0.71858	0.09586			202.282	5.39861	3.85335			206.401	8.71583	6.47989	1.98829	658.454
																							263.668	0.68277	0.08151			202.731	5.52293	3.83066			206.869	8.95898	6.61666	2.02371	445.967
																							264.432	0.64768	0.06919			203.183	5.6457	3.80368			207.339	9.19866	6.74766	2.06027	691.277
																							265.201	0.61337	0.05865			203.636	5.76641	3.77243			207.811	9.43409	6.87236	2.09793	455.688
																							265.974	0.57992	0.04966			204.092	5.88455	3.73699			208.286	9.66446	6.99025	2.13662	721.417
																							266.752	0.54739	0.04201			204.55	5.99967	3.69752			208.762	9.88902	7.10088	2.17625	464.638
																							267.534	0.51584	0.03552			205.009	6.1113	3.65426			209.241	10.107	7.20382	2.21676	748.382
																							268.321	0.48529	0.03002			205.471	6.21902	3.60746			209.722	10.3176	7.29867	2.25805	472.744
																							269.113	0.4558	0.02538			205.935	6.32245	3.55741			210.205	10.5202	7.38508	2.30005	771.727
																							269.909	0.4274	0.02147			206.401	6.4212	3.50441			210.691	10.714	7.46274	2.34265	479.94
																							270.71	0.4001	0.01819			206.869	6.51495	3.44878			211.179	10.8983	7.5314	2.38575	791.053
																							271.515	0.37392	0.01544			207.339	6.60336	3.39083			211.669	11.0725	7.59082	2.42924	486.165
																							272.326	0.34888	0.01313			207.811	6.68615	3.33085			212.161	11.2359	7.64085	2.47302	806.024
																							273.141	0.32497	0.01121			208.286	6.76306	3.26914			212.655	11.388	7.68135	2.51698	491.364
																							273.961	0.3022	0.0096			208.762	6.83386	3.20598			213.152	11.5282	7.71227	2.56098	816.376
																							274.787	0.28056	0.00826			209.241	6.89835	3.14162			213.651	11.6559	7.73356	2.60491	495.489
																							275.617	0.26003	0.00714			209.722	6.95634	3.0763			214.153	11.7708	7.74526	2.64864	821.923
																							276.452	0.24061	0.00621			210.205	7.00771	3.01023			214.657	11.8724	7.74743	2.69204	498.5
																							277.292	0.22227	0.00543			210.691	7.05232	2.94362			215.163	11.9603	7.7402	2.73499	822.566
																							278.138	0.20499	0.00478			211.179	7.09009	2.87662			215.672	12.0343	7.72371	2.77734	500.366
																							278.988	0.18873	0.00423			211.669	7.12096	2.80942			216.183	12.0939	7.69817	2.81896	818.296
																							279.844	0.17348	0.00378			212.161	7.14491	2.74215			216.696	12.1391	7.66383	2.85972	501.065
																							280.705	0.1592	0.00339			212.655	7.16193	2.67493			217.212	12.1697	7.62095	2.89947	809.191
																							281.571	0.14586	0.00306			213.152	7.17204	2.6079			217.731	12.1855	7.56985	2.9381	500.585
																							282.443	0.13341	0.00278			213.651	7.1753	2.54114			218.252	12.1866	7.51088	2.97545	795.417
																							283.32	0.12183	0.00254			214.153	7.17177	2.47477			218.775	12.1729	7.4444	3.01141	777.224
																							284.203	0.11108	0.00233			214.657	7.16157	2.40887			219.301	12.1445	7.3708	3.04583	754.935
																							285.091	0.10113	0.00215			215.163	7.14481	2.34353			219.829	12.1015	7.29051	3.0786	728.944
																							285.985	0.09193	0.00198			215.672	7.12163	2.27882			220.36	12.0441	7.20394	3.10959	699.695
																							286.884	0.08345	0.00184			216.183	7.09219	2.21484			220.894	11.9725	7.11155	3.13868	667.679
																							287.789	0.07567	0.00171			216.696	7.05669	2.15165			221.43	11.887	7.01378	3.16576	633.417
																							288.7	0.06854	0.00159			217.212	7.01532	2.08932			221.969	11.788	6.9111	3.19072	597.443
																							289.616	0.06205	0.00148			217.731	6.96829	2.02793			222.51	11.6757	6.80396	3.21347	560.299
																							290.539	0.05616	0.00138			218.252	6.91582	1.96755			223.054	11.5507	6.69282	3.23389	522.51
																							291.467	0.05085	0.00129			218.775	6.85817	1.90825			223.601	11.4133	6.57815	3.25192	484.588
																							292.401	0.04612	0.0012			219.301	6.79557	1.85009			224.15	11.2641	6.46038	3.26746	447.004
																							293.341	0.04194	0.00112			219.829	6.72828	1.79314			224.702	11.1036	6.33996	3.28045	410.192
																							294.288	0.03832	0.00104			220.36	6.65658	1.73745			225.257	10.9324	6.21732	3.29082	374.538
																							295.24	0.03526	0.00097145			220.894	6.58071	1.68309			225.815	10.7511	6.09287	3.29852	340.372
																							296.199	0.03276	0.000903807			221.43	6.50096	1.6301			226.375	10.5603	5.967	3.30351	307.97
																							297.163	0.03085	0.000839944			221.969	6.41759	1.57853			226.938	10.3606	5.84009	3.30576	277.547
																							298.134	0.02956	0.000779631			222.51	6.33089	1.52844			227.504	10.1526	5.71251	3.30522	249.263
																							299.112	0.02891	0.000722674			223.054	6.24111	1.47985			228.073	9.9372	5.58459	3.30191	223.222
																							300.096	0.28959	0.00669			223.601	6.14854	1.43279			228.644	9.71491	5.45665	3.2958	199.475
																							301.086	0.29758	0.00618			224.15	6.05343	1.3873			229.219	9.48647	5.32898	3.28691	178.026
																							302.083	0.31369	0.0057			224.702	5.95605	1.34338			229.796	9.25256	5.20186	3.27525	158.837
																							303.087	0.33861	0.00526			225.257	5.85664	1.30107			230.377	9.0139	5.07555	3.26085	141.835
																							304.097	0.37306	0.00483			225.815	5.75546	1.26035			230.96	8.77116	4.95026	3.24374	126.915
																							305.114	0.41782	0.00444			226.375	5.65275	1.22123			231.546	8.52506	4.82621	3.22398	113.949
																							306.138	0.47364	0.00407			226.938	5.54874	1.18369			232.135	8.27624	4.70359	3.20162	102.792
																							307.169	0.54125	0.00373			227.504	5.44366	1.14774			232.727	8.0254	4.58256	3.17672	93.2849
																							308.207	0.6213	0.00341			228.073	5.3377	1.11334			233.323	7.77317	4.46326	3.14936	85.2645
																							309.251	0.71431	0.00311			228.644	5.2311	1.08048			233.921	7.52019	4.34583	3.11962	78.5634
																							310.303	0.82064	0.00285			229.219	5.12404	1.04912			234.522	7.26709	4.23038	3.0876	73.0172
																							311.362	0.94042	0.00261			229.796	5.0167	1.01921			235.127	7.01443	4.11699	3.05339	68.4659
																							312.429	1.07352	0.00241			230.377	4.90926	0.99074			235.734	6.76281	4.00575	3.0171	64.758
																							313.502	1.21953	0.00227			230.96	4.8019	0.96363			236.345	6.51275	3.89671	2.97883	61.7518
																							314.583	1.37764	0.00219			231.546	4.69477	0.93786			236.959	6.26479	3.78994	2.93872	59.3172
																							315.672	1.54672	0.00223			232.135	4.58802	0.91336			237.576	6.0194	3.68546	2.89686	57.3363
																							316.768	1.7252	0.00243			232.727	4.48178	0.89008			238.196	5.77704	3.58331	2.85341	55.7042
																							317.872	1.91114	0.00288			233.323	4.3762	0.86796			238.82	5.53816	3.48349	2.80847	54.3293
																							318.983	2.10222	0.00372			233.921	4.27139	0.84695			239.447	5.30312	3.38603	2.76219	53.1324
																							320.102	2.29575	0.00514			234.522	4.16747	0.82698			240.077	5.07232	3.29092	2.7147	52.0468
																							321.229	2.48876	0.00742			235.127	4.06454	0.80798			240.71	4.84608	3.19814	2.66613	51.0172
																							322.364	2.67802	0.01095			235.734	3.9627	0.78991			241.347	4.62471	3.10771	2.61661	49.9994
																							323.508	2.86015	0.01626			236.345	3.86204	0.77269			241.987	4.40848	3.01958	2.56629	48.9586
																							324.659	3.03171	0.02403			236.959	3.76266	0.75626			242.631	4.19765	2.93376	2.51529	47.8689
																							325.818	3.18929	0.03517			237.576	3.66462	0.74057			243.278	3.9924	2.8502	2.46375	46.7124
																							326.986	3.32962	0.05075			238.196	3.568	0.72555			243.928	3.79293	2.76888	2.41179	45.4778
																							328.162	3.4497	0.0721			238.82	3.47286	0.71114			244.582	3.5994	2.68977	2.35955	44.1599
																							329.347	3.5469	0.1007			239.447	3.37927	0.69729			245.24	3.41192	2.61283	2.30713	42.7581
																							330.54	3.61902	0.13818			240.077	3.28727	0.68393			245.901	3.23059	2.53804	2.25467	41.2759
																							331.742	3.66441	0.18623			240.71	3.19691	0.67103			246.565	3.05549	2.46535	2.20226	39.7201
																							332.953	3.682	0.24644			241.347	3.10825	0.65852			247.233	2.88667	2.39473	2.15003	38.0998
																							334.173	3.67138	0.32019			241.987	3.02131	0.64636			247.905	2.72414	2.32613	2.09807	36.4261
																							335.401	3.63277	0.40838			242.631	2.93614	0.6345			248.581	2.5679	2.25952	2.04648	34.7112
																							336.639	3.56706	0.5113			243.278	2.85275	0.6229			249.26	2.41795	2.19486	1.99534	32.9679
																							337.886	3.4757	0.6284			243.928	2.77118	0.61153			249.943	2.27422	2.13209	1.94474	31.2092
																							339.142	3.36075	0.75811			244.582	2.69144	0.60033			250.63	2.13668	2.07119	1.89476	29.4482
																							340.407	3.22471	0.89775			245.24	2.61355	0.58929			251.32	2.00523	2.01211	1.84546	27.6972
																							341.682	3.07046	1.04352			245.901	2.53753	0.57837			252.014	1.8798	1.9548	1.7969	25.9678
																							342.967	2.90119	1.19062			246.565	2.46337	0.56754			252.712	1.76027	1.89922	1.74915	24.2708
																							344.261	2.72025	1.33341			247.233	2.39109	0.55677			253.414	1.64653	1.84532	1.70225	22.6157
																							345.565	2.53104	1.46582			247.905	2.32067	0.54605			254.12	1.53845	1.79306	1.65623	21.0111
																							346.879	2.33695	1.58166			248.581	2.25212	0.53535			254.83	1.43588	1.74239	1.61114	19.464
																							348.203	2.14121	1.67519			249.26	2.18543	0.52466			255.544	1.33869	1.69327	1.56701	17.9803
																							349.537	1.94682	1.74156			249.943	2.12058	0.51397			256.262	1.24671	1.64564	1.52385	16.5647
																							350.881	1.75652	1.77717			250.63	2.05756	0.50326			256.983	1.15979	1.59946	1.48168	15.2207
																							352.236	1.57267	1.78008			251.32	1.99636	0.49253			257.709	1.07775	1.55468	1.44051	13.9506
																							353.601	1.39728	1.75012			252.014	1.93693	0.48177			258.439	1.00043	1.51126	1.40035	12.7555
																							354.977	1.23193	1.68894			252.712	1.87927	0.47098			259.174	0.92765	1.46915	1.3612	11.6359
																							356.364	1.07784	1.59985			253.414	1.82334	0.46015			259.912	0.85923	1.42829	1.32305	10.5912
																							357.761	0.93579	1.48752			254.12	1.76911	0.44928			260.655	0.79501	1.38864	1.28589	9.62006
																							359.17	0.80623	1.35758			254.83	1.71655	0.43838			261.402	0.73479	1.35014	1.24971	8.72059
																							360.589	0.68929	1.21614			255.544	1.66561	0.42746			262.153	0.67841	1.31277	1.21449	7.89038
																							362.02	0.58479	1.06936			256.262	1.61626	0.41651			262.908	0.62568	1.27645	1.18021	7.12655
																							363.463	0.49234	0.92295			256.983	1.56846	0.40554			263.668	0.57645	1.24116	1.14686	6.4259
																							364.917	0.41133	0.7819			257.709	1.52216	0.39456			264.432	0.53052	1.20684	1.1144	5.78508
																							366.382	0.34101	0.6502			258.439	1.47732	0.38359			265.201	0.48774	1.17345	1.08281	5.20049
																							367.859	0.28055	0.53071			259.174	1.43389	0.37262			265.974	0.44794	1.14095	1.05207	4.66856
																							369.349	0.22904	0.42519			259.912	1.39182	0.36168			266.752	0.41095	1.10928	1.02213	4.18563
																							370.85	0.18556	0.33437			260.655	1.35107	0.35076			267.534	0.37664	1.07842	0.99298	3.74812
																							372.364	0.14918	0.2581			261.402	1.31158	0.33989			268.321	0.34483	1.04832	0.96458	3.35253
																							373.89	0.11901	0.19556			262.153	1.27331	0.32907			269.113	0.31538	1.01895	0.9369	2.99547
																							375.429	0.09422	0.14543			262.908	1.23621	0.31833			269.909	0.28816	0.99026	0.90992	2.67373
																							376.98	0.07402	0.10617			263.668	1.20023	0.30766			270.71	0.26302	0.96223	0.88359	2.38423
																							378.544	0.05771	0.07607			264.432	1.16532	0.29708			271.515	0.23984	0.93482	0.8579	2.12409
																							380.121	0.04464	0.0535			265.201	1.13144	0.28662			272.326	0.21848	0.908	0.83282	1.89063
																							381.712	0.03427	0.03693			265.974	1.09852	0.27626			273.141	0.19884	0.88174	0.80831	1.68133
																							383.316	0.02611	0.02503			266.752	1.06654	0.26604			273.961	0.18078	0.85602	0.78435	1.4939
																							384.933	0.01974	0.01665			267.534	1.03544	0.25596			274.787	0.16421	0.83082	0.76092	1.32619
																							386.564	0.01481	0.01087			268.321	1.00519	0.24603			275.617	0.14902	0.8061	0.738	1.17628
																							388.209	0.01102	0.00696			269.113	0.97573	0.23627			276.452	0.13511	0.78185	0.71555	1.04237
																							389.868	0.00814	0.00438			269.909	0.94703	0.22667			277.292	0.12238	0.75806	0.69357	0.92286
																							391.541	0.00597	0.0027			270.71	0.91906	0.21726			278.138	0.11076	0.7347	0.67203	0.81628
																							393.229	0.00434	0.00164			271.515	0.89177	0.20804			278.988	0.10016	0.71177	0.65092	0.7213
																							394.931	0.00314	0.000975083			272.326	0.86513	0.19902			279.844	0.09049	0.68925	0.63022	0.63673
																							396.648	0.00225	0.000569363			273.141	0.83911	0.19021			280.705	0.08169	0.66713	0.60993	0.56149
																							398.381	0.0016	0.000326341			273.961	0.81368	0.18161			281.571	0.07368	0.6454	0.59002	0.4946
																							400.128	0.00113	0.000183606			274.787	0.78882	0.17324			282.443	0.06641	0.62406	0.57049	0.43519
																							401.89	0.000788811	0.000101404			275.617	0.76449	0.16508			283.32	0.05981	0.6031	0.55134	0.38246
																							403.669	0.000548008	5.49781e-05			276.452	0.74068	0.15716			284.203	0.05383	0.58252	0.53255	0.33572
																							405.463	0.000377803	2.92635e-05			277.292	0.71736	0.14947			285.091	0.04841	0.56232	0.51412	0.29432
																							407.273	0.00025847	1.52938e-05			278.138	0.69452	0.14201			285.985	0.04351	0.5425	0.49606	0.2577
																							409.099	0.000175476	7.84956e-06			278.988	0.67213	0.1348			286.884	0.03908	0.52305	0.47835	0.22533
																							410.942	0.000118222	3.95796e-06			279.844	0.65019	0.12782			287.789	0.03508	0.50399	0.46101	0.19677
																							412.802	7.90385e-05	1.96174e-06			280.705	0.62869	0.12109			288.7	0.03148	0.48532	0.44403	0.17158
																												281.571	0.6076	0.1146			289.616	0.02822	0.46705	0.42743	0.14941
																												282.443	0.58693	0.10835			290.539	0.0253	0.44918	0.41121	0.12991
																												283.32	0.56666	0.10234			291.467	0.02266	0.43173	0.39539	0.1128
																												284.203	0.54679	0.09656			292.401	0.0203	0.41472	0.37998	0.09779
																												285.091	0.52732	0.09103			293.341	0.01817	0.39818	0.36501	0.08466
																												285.985	0.50825	0.08573			294.288	0.01626	0.38211	0.35052	0.07317
																												286.884	0.48957	0.08067			295.24	0.01455	0.36656	0.33653	0.06315
																												287.789	0.47129	0.07584			296.199	0.01302	0.35157	0.3231	0.05442
																												288.7	0.45341	0.07124			297.163	0.01164	0.33719	0.31027	0.04682
																												289.616	0.43594	0.06687			298.134	0.01041	0.32347	0.29812	0.04022
																												290.539	0.41888	0.06272			299.112	0.00931	0.31047	0.28673	0.0345
																												291.467	0.40226	0.05881			300.096	0.00833	0.2983	0.27619	0.02955
																												292.401	0.38608	0.05512			301.086	0.00745	0.28702	0.26661	0.02527
																												293.341	0.37036	0.05166			302.083	0.00667	0.27677	0.25811	0.02157
																												294.288	0.35515	0.04843			303.087	0.00598	0.26765	0.25083	0.01839
																												295.24	0.34046	0.04544			304.097	0.00536	0.2598	0.24494	0.01565
																												296.199	0.32633	0.0427			305.114	0.00481	0.25339	0.24059	0.0133
																												297.163	0.31283	0.04021			306.138	0.00432	0.24857	0.23797	0.01129
																												298.134	0.30001	0.03798			307.169	0.0039	0.24552	0.23726	0.00956
																												299.112	0.28794	0.03604			308.207	0.00354	0.24442	0.23865	0.00809
																												300.096	0.27672	0.03439			309.251	0.00323	0.24544	0.24233	0.00683
																												301.086	0.26644	0.03305			310.303	0.00298	0.24878	0.24847	0.00576
																												302.083	0.25722	0.03206			311.362	0.00278	0.25459	0.25722	0.00485
																												303.087	0.24919	0.03142			312.429	0.00265	0.26302	0.26869	0.00408
																												304.097	0.24252	0.03117			313.502	0.00259	0.2742	0.28298	0.00343
																												305.114	0.23736	0.03134			314.583	0.00261	0.28819	0.30011	0.00287
																												306.138	0.23389	0.03195			315.672	0.00272	0.30504	0.32005	0.0024
																												307.169	0.2323	0.03302			316.768	0.00293	0.32471	0.34269	0.00201
																												308.207	0.23279	0.03459			317.872	0.00327	0.34713	0.36786	0.00168
																												309.251	0.23556	0.03666			318.983	0.00376	0.37213	0.39529	0.0014
																												310.303	0.24079	0.03926			320.102	0.00442	0.39949	0.42462	0.00116
																												311.362	0.24867	0.0424			321.229	0.00529	0.42888	0.45544	0.000964855
																												312.429	0.25934	0.04607			322.364	0.00639	0.45992	0.48721	0.000800204
																												313.502	0.27294	0.05026			323.508	0.00775	0.49214	0.51936	0.000662623
																												314.583	0.28953	0.05494			324.659	0.00943	0.52503	0.55125	0.000547848
																												315.672	0.30914	0.0601			325.818	0.01143	0.55798	0.58218	0.000452248
																												316.768	0.33172	0.06567			326.986	0.01381	0.59038	0.61144	0.000372744
																												317.872	0.35717	0.07159			328.162	0.01659	0.62158	0.63834	0.000306733
																												318.983	0.38528	0.07779			329.347	0.01978	0.65091	0.66219	0.000252012
																												320.102	0.41579	0.08417			330.54	0.02341	0.67772	0.68235	0.000206723
																												321.229	0.44832	0.09064			331.742	0.02747	0.7014	0.69825	0.0001693
																												322.364	0.48243	0.09709			332.953	0.03196	0.72137	0.70944	0.000138428
																												323.508	0.51758	0.10338			334.173	0.03684	0.73716	0.71554	0.000113001
																												324.659	0.55318	0.10941			335.401	0.04207	0.74834	0.71632	9.20941e-05
																												325.818	0.58858	0.11505			336.639	0.0476	0.75461	0.71168	7.49312e-05
																												326.986	0.62308	0.12017			337.886	0.05335	0.75577	0.70167	6.08652e-05
																												328.162	0.65595	0.12466			339.142	0.05922	0.75173	0.68644	4.93572e-05
																												329.347	0.68649	0.12841			340.407	0.06511	0.74254	0.66631	3.99573e-05
																												330.54	0.71399	0.13135			341.682	0.07089	0.72835	0.6417	3.22929e-05
																												331.742	0.7378	0.13338			342.967	0.07644	0.70941	0.61313	2.60539e-05
																												332.953	0.75735	0.13447			344.261	0.08163	0.68608	0.58119	2.09843e-05
																												334.173	0.77212	0.13457			345.565	0.08632	0.65882	0.54653	1.68718e-05
																												335.401	0.78174	0.13369			346.879	0.0904	0.62813	0.50985	1.35416e-05
																												336.639	0.78593	0.13183			348.203	0.09376	0.5946	0.47184	1.08497e-05
																												337.886	0.78453	0.12903			349.537	0.09629	0.55881	0.43317
																												339.142	0.77753	0.12534			350.881	0.09794	0.52139	0.3945
																												340.407	0.76505	0.12086			352.236	0.09864	0.48296	0.35641
																												341.682	0.74733	0.11566			353.601	0.09839	0.44411	0.31943
																												342.967	0.72471	0.10985			354.977	0.09719	0.4054	0.28401
																												344.261	0.69766	0.10356			356.364	0.09507	0.36736	0.25051
																												345.565	0.66672	0.09688			357.761	0.09209	0.33044	0.21921
																												346.879	0.63248	0.08996			359.17	0.08834	0.29503	0.19031
																												348.203	0.59562	0.0829			360.589	0.08392	0.26147	0.16393
																												349.537	0.55678	0.07582			362.02	0.07896	0.22999	0.1401
																												350.881	0.51665	0.06882			363.463	0.07356	0.2008	0.11881
																												352.236	0.47589	0.062			364.917	0.06787	0.17399	0.09998
																												353.601	0.43511	0.05543			366.382	0.06202	0.14963	0.0835
																												354.977	0.39489	0.04918			367.859	0.05612	0.12771	0.06922
																												356.364	0.35574	0.0433			369.349	0.05029	0.10818	0.05696
																												357.761	0.3181	0.03784			370.85	0.04463	0.09095	0.04654
																												359.17	0.28234	0.03282			372.364	0.03923	0.07588	0.03777
																												360.589	0.24873	0.02825			373.89	0.03414	0.06284	0.03044
																												362.02	0.21749	0.02414			375.429	0.02943	0.05165	0.02438
																												363.463	0.18876	0.02046			376.98	0.02513	0.04215	0.01941
																												364.917	0.16261	0.01722			378.544	0.02124	0.03414	0.01537
																												366.382	0.13903	0.01438			380.121	0.01779	0.02746	0.0121
																												367.859	0.11799	0.01192			381.712	0.01475	0.02193	0.0095
																												369.349	0.09938	0.0098			383.316	0.01211	0.0174	0.00742
																												370.85	0.08309	0.008			384.933	0.00985	0.01372	0.00579
																												372.364	0.06895	0.00649			386.564	0.00793	0.01076	0.0045
																												373.89	0.0568	0.00522			388.209	0.00633	0.00839	0.0035
																												375.429	0.04645	0.00416			389.868	0.005	0.00651	0.00273
																												376.98	0.03771	0.0033			391.541	0.00391	0.00503	0.00213
																												378.544	0.0304	0.00259			393.229	0.00303	0.00388	0.00167
																												380.121	0.02434	0.00203			394.931	0.00233	0.00298	0.00132
																												381.712	0.01935	0.00157			396.648	0.00177	0.00229	0.00105
																												383.316	0.01529	0.00121			398.381	0.00133	0.00176	0.000837472
																												384.933	0.012	0.000922272			400.128	0.000992195	0.00136	0.000676261
																												386.564	0.00937	0.000699438			401.89	0.000732625	0.00106	0.000551271
																												388.209	0.00728	0.00052674			403.669	0.000535788	0.000823181	0.000453699
																												389.868	0.00562	0.000393968			405.463	0.000388096	0.000646933	0.000376877
																												391.541	0.00433	0.000292698			407.273	0.000278442	0.000513074	0.000315785
																												393.229	0.00332	0.000216056			409.099	0.000197875	0.000411054	0.000266666
																												394.931	0.00255	0.000158497			410.942	0.000139296	0.00033286	0.000226718
																												396.648	0.00195	0.000115594			412.802	9.71392e-05	0.000272457	0.000193853
																												398.381	0.0015	8.38486e-05			414.678	6.71127e-05	0.000225338	0.00016652
																												400.128	0.00115	6.05251e-05			416.571	4.59432e-05	0.00018816	0.000143559
																												401.89	0.000888286	4.35059e-05			418.482	3.11686e-05	0.000158457	0.000124102
																												403.669	0.000689928	3.1167e-05			420.411	2.096e-05	0.000134416	0.000107492
																												405.463	0.000539964	2.2275e-05			422.357	1.39761e-05	0.000114708	9.32264e-05
																												407.273	0.000426424	1.59021e-05			424.322	9.24455e-06	9.83577e-05	8.09163e-05
																												409.099	0.000340165	1.13563e-05			426.304	6.06964e-06	8.46464e-05	7.02557e-05
																												410.942	0.000274268	8.12659e-06			428.306	3.95892e-06	7.30415e-05	6.09996e-05
																												412.802	0.000223536	5.8384e-06			430.326	2.56823e-06	6.31446e-05	5.2949e-05
																												414.678	0.000184102	4.2198e-06			432.366	1.65969e-06	5.46531e-05	4.59395e-05
																												416.571	0.000153101	3.07481e-06			434.424	1.07075e-06	4.73338e-05	3.98333e-05
																												418.482	0.000128428	2.26334e-06			436.503	6.91599e-07	4.10036e-05	3.45133e-05
																												420.411	0.000108535	1.68592e-06			438.602	4.48861e-07	3.55161e-05	2.98792e-05
																												422.357	9.22906e-05	1.27245e-06			440.72	2.94043e-07	3.07522e-05	2.58446e-05
																												424.322	7.88658e-05	9.73774e-07			442.86	1.95426e-07	2.66127e-05	2.23339e-05
																												426.304	6.76506e-05	7.55623e-07			445.02	1.32484e-07	2.30149e-05	1.92815e-05
																												428.306	5.81932e-05	5.94179e-07
																												430.326	5.01561e-05	4.72946e-07
																												432.366	4.32839e-05	3.80495e-07
																												434.424	3.73797e-05	3.08897e-07
																												436.503	3.22895e-05	2.52627e-07
																												438.602	2.78904e-05	2.07811e-07
																												440.72	2.40826e-05	1.71701e-07
																												442.86	2.07837e-05	1.42322e-07
																												445.02	1.79246e-05	1.18233e-07

## Sheet: Figure_S3
n = 4	wavenumber [cm-1]	σ 10-20 cm2	Noise		n = 5	wavenumber [cm-1]	σ 10-20 cm2	Noise		n = 6	wavenumber [cm-1]	σ 10-20 cm2	Noise		n = 7	wavenumber [cm-1]	σ 10-20 cm2	Noise		n = 8	wavenumber [cm-1]	σ 10-20 cm2	Noise		n = 9	wavenumber [cm-1]	σ 10-20 cm2	Noise		n = 10	wavenumber [cm-1]	σ 10-20 cm2	Noise		n = 11	wavenumber [cm-1]	σ 10-20 cm2	Noise
	3731.34	2.03708	1.83166			3846.15	0.00466	1.01109			3846.15	0.47992	0.40071			3846.15	0.27024	0.34014			3846.15	0.36343	1.35805			3846.15	0.85267	0.44264			3846.15	1.33725	0.72221			3846.15	0.00466	1.71466
	3727.17	0.00557	1.74769			3824.09	0.00468	0.99298			3824.09	0.39345	0.40282			3824.09	0.28103	0.34661			3824.09	0.37003	1.36519			3824.09	0.50586	0.45434			3824.09	1.34428	0.68853			3824.09	0.00468	1.74709
	3723.01	0.00559	1.78725			3802.28	0.00485	0.88306			3802.28	0.51431	0.39786			3802.28	0.6065	0.34449			3802.28	0.4755	1.48862			3802.28	0.91703	0.43668			3802.28	1.24211	0.66958			3802.28	0.00485	2.26103
	3718.86	0.00555	1.79238			3780.72	0.00487	1.00817			3780.72	0.47243	0.44321			3780.72	0.51626	0.35067			3780.72	0.43833	1.43823			3780.72	0.50165	0.49191			3780.72	1.25656	0.69647			3780.72	0.00487	2.10888
	3714.71	0.00553	1.84191			3759.4	0.00522	1.14367			3759.4	0.52223	0.46478			3759.4	0.188	0.38645			3759.4	0.42823	1.46202			3759.4	0.89823	0.49089			3759.4	1.37867	0.76245			3759.4	0.00522	2.91924
	3710.57	0.00566	1.89062			3738.32	0.0056	1.19363			3738.32	0.59401	0.48194			3738.32	0.4259	0.42029			3738.32	0.65005	1.65484			3738.32	0.94146	0.52116			3738.32	1.56909	0.87981			3738.32	0.0056	1.92774
	3706.45	1.74344	1.65516			3717.47	0.00553	1.18348			3717.47	0.77424	0.4756			3717.47	0.75765	0.4203			3717.47	0.82954	1.6543			3717.47	0.87931	0.58068			3717.47	1.98537	0.76871			3717.47	0.00553	2.649
	3702.33	0.00544	1.6602			3696.86	1.6236	1.02287			3696.86	1.28806	0.49249			3696.86	1.24476	0.42755			3696.86	1.25559	1.68119			3696.86	1.30971	0.50873			3696.86	1.95915	0.75227			3696.86	2.73848	2.27846
	3698.22	1.99788	1.56356			3676.47	2.53745	1.18183			3676.47	2.27096	0.52139			3676.47	2.08558	0.41712			3676.47	2.18986	1.75519			3676.47	1.56998	0.58512			3676.47	2.74022	0.78788			3676.47	4.02632	2.5838
	3694.13	0.00545	1.72121			3656.31	6.14089	1.19422			3656.31	6.32201	0.4641			3656.31	5.35418	0.41317			3656.31	5.98242	1.64964			3656.31	3.99582	0.48674			3656.31	4.62406	0.80935			3656.31	11.3649	2.68841
	3690.04	0.0056	1.68062			3636.36	8.59969	1.24672			3636.36	8.42992	0.47216			3636.36	8.04795	0.38197			3636.36	5.87283	1.60731			3636.36	7.82513	0.49869			3636.36	6.57311	0.74272			3636.36	8.29199	2.16451
	3685.96	1.90498	1.80353			3616.64	2.121	1.1097			3616.64	1.72742	0.50292			3616.64	1.62902	0.39359			3616.64	1.47049	1.67715			3616.64	1.2245	0.55758			3616.64	1.94061	0.82544			3616.64	3.06671	2.26313
	3681.89	2.26859	1.68208			3597.12	1.6228	1.1821			3597.12	1.30135	0.4718			3597.12	1.06285	0.38885			3597.12	1.20803	1.67022			3597.12	1.02138	0.49773			3597.12	1.80426	0.75178			3597.12	2.81008	1.95462
	3677.82	2.3819	1.59747			3577.82	2.04243	0.92556			3577.82	1.3237	0.45502			3577.82	1.13238	0.39297			3577.82	1.34438	1.5864			3577.82	0.91521	0.53775			3577.82	1.78906	0.74458			3577.82	2.63189	2.00623
	3673.77	2.90484	1.76195			3558.72	2.77387	0.87098			3558.72	1.50527	0.41182			3558.72	1.33013	0.35502			3558.72	1.64255	1.45228			3558.72	1.07925	0.45442			3558.72	1.85556	0.68163			3558.72	3.47917	2.08277
	3669.72	2.86741	1.77674			3539.82	3.91862	1.02514			3539.82	1.76183	0.38166			3539.82	1.30917	0.33284			3539.82	1.97041	1.27646			3539.82	1.08727	0.43047			3539.82	2.10354	0.6213			3539.82	4.03401	2.32543
	3665.69	3.88125	1.79529			3521.13	3.62126	1.26195			3521.13	1.95085	0.53039			3521.13	1.59725	0.42675			3521.13	2.33492	1.89379			3521.13	1.53629	0.61574			3521.13	2.23128	0.88398			3521.13	5.29776	2.42027
	3661.66	4.38406	1.84356			3502.63	2.19957	1.04519			3502.63	1.92398	0.47839			3502.63	1.70038	0.35359			3502.63	2.18397	1.59537			3502.63	1.65878	0.51479			3502.63	2.17357	0.73319			3502.63	4.66954	2.09557
	3657.64	6.22753	1.79619			3484.32	1.57191	0.89824			3484.32	1.87133	0.42573			3484.32	1.67484	0.35555			3484.32	2.03507	1.39945			3484.32	1.65144	0.43976			3484.32	2.20349	0.61286			3484.32	4.38358	1.95086
	3653.64	6.69454	1.72307			3466.2	1.41006	0.95597			3466.2	1.91672	0.43019			3466.2	1.75898	0.33459			3466.2	2.18439	1.53981			3466.2	1.65861	0.4732			3466.2	2.06968	0.6644			3466.2	4.69381	1.96452
	3649.64	7.51892	1.90532			3448.28	1.36816	0.9815			3448.28	1.9878	0.44118			3448.28	1.74985	0.36187			3448.28	2.28026	1.59691			3448.28	1.94814	0.48084			3448.28	2.07207	0.68408			3448.28	4.90752	2.64709
	3645.64	9.4046	1.79794			3430.53	1.29684	1.15635			3430.53	2.17761	0.48632			3430.53	1.81017	0.39986			3430.53	2.36133	1.71999			3430.53	2.3181	0.55656			3430.53	2.50723	0.70786			3430.53	4.65782	2.44239
	3641.66	10.4736	1.55596			3412.97	1.40289	1.26875			3412.97	2.21333	0.48626			3412.97	1.97858	0.39683			3412.97	2.35306	1.7148			3412.97	2.30835	0.53098			3412.97	2.87286	0.82162			3412.97	4.34841	2.62693
	3637.69	9.75017	1.58182			3395.59	1.36253	1.24456			3395.59	2.29448	0.50726			3395.59	1.97007	0.45418			3395.59	2.15882	1.80966			3395.59	2.37116	0.61343			3395.59	2.80764	0.90246			3395.59	4.46509	3.00229
	3633.72	7.70259	1.61765			3378.38	1.42186	1.24489			3378.38	2.23958	0.54922			3378.38	2.05651	0.42717			3378.38	2.16025	1.87225			3378.38	2.36163	0.60414			3378.38	3.16105	0.81772			3378.38	4.25948	3.94826
	3629.76	5.16831	1.66951			3361.34	0.00627	1.45415			3361.34	2.31286	0.57038			3361.34	2.14989	0.47636			3361.34	2.12482	1.87495			3361.34	2.30032	0.62052			3361.34	3.17156	0.87751			3361.34	3.79208	2.97725
	3625.82	3.40669	1.62905			3344.48	0.00622	1.40554			3344.48	2.34464	0.55351			3344.48	2.28245	0.47888			3344.48	2.02124	1.78883			3344.48	2.32598	0.60948			3344.48	3.13448	0.88313			3344.48	3.23398	2.55609
	3621.88	3.55206	1.70326			3327.79	1.3053	1.27481			3327.79	2.06165	0.55506			3327.79	2.45812	0.45137			3327.79	1.97016	1.70763			3327.79	2.07995	0.61606			3327.79	2.86069	0.86004			3327.79	3.08637	2.91559
	3617.95	2.30759	1.64279			3311.26	0.00574	1.32596			3311.26	1.96885	0.52809			3311.26	2.33622	0.43625			3311.26	1.91145	1.65102			3311.26	1.82535	0.56253			3311.26	3.19149	0.78065			3311.26	3.40387	3.14557
	3614.02	2.70644	1.52407			3294.89	0.00528	1.1351			3294.89	1.70002	0.46988			3294.89	2.08542	0.41181			3294.89	1.82145	1.64004			3294.89	1.81617	0.53324			3294.89	2.34412	0.75498			3294.89	3.305	2.49195
	3610.11	2.87213	1.67901			3278.69	0.00495	1.10434			3278.69	1.5847	0.46551			3278.69	1.96602	0.38627			3278.69	1.62432	1.48138			3278.69	1.51537	0.49027			3278.69	2.4761	0.6735			3278.69	3.0456	2.76828
	3606.2	1.68759	1.58676			3262.64	0.00462	1.07159			3262.64	1.37644	0.41108			3262.64	1.66281	0.35104			3262.64	1.39029	1.34625			3262.64	1.47805	0.43418			3262.64	2.09699	0.61432			3262.64	0.00462	2.53578
	3602.3	0.00519	1.55105			3246.75	0.00442	0.98898			3246.75	1.35543	0.41502			3246.75	1.61592	0.34879			3246.75	1.24505	1.26991			3246.75	1.42166	0.42385			3246.75	2.00003	0.59604			3246.75	2.38414	2.15456
	3598.42	1.69367	1.47096			3231.02	0.00422	0.94603			3231.02	1.24166	0.38432			3231.02	1.37681	0.34631			3231.02	1.05583	1.16617			3231.02	1.21632	0.42233			3231.02	1.8456	0.57015			3231.02	2.44953	2.05676
	3594.54	2.39772	1.52393			3215.43	0.00419	0.87638			3215.43	1.14893	0.37739			3215.43	1.32924	0.32287			3215.43	0.9812	1.28649			3215.43	1.09023	0.44448			3215.43	1.57664	0.59543			3215.43	0.00419	2.92265
	3590.66	1.76457	1.48788			3200	0.00431	0.89727			3200	0.99649	0.39256			3200	1.21649	0.30197			3200	0.88002	1.25733			3200	1.08708	0.44864			3200	1.7169	0.59099			3200	0.00431	2.873
	3586.8	1.59511	1.45203			3184.71	0.00435	0.89213			3184.71	0.93564	0.40907			3184.71	1.20981	0.31768			3184.71	0.8225	1.2851			3184.71	0.9487	0.43954			3184.71	1.60147	0.59185			3184.71	0.00435	1.95832
	3582.95	0.0052	1.62888			3169.57	0.00429	0.89607			3169.57	0.76316	0.41159			3169.57	1.02898	0.30012			3169.57	0.79746	1.23319			3169.57	0.85748	0.41588			3169.57	1.52631	0.58309			3169.57	0.00429	1.99793
	3579.1	2.00389	1.5068			3154.57	0.00438	0.90601			3154.57	0.73093	0.38078			3154.57	1.03293	0.31513			3154.57	0.71342	1.35962			3154.57	0.97604	0.43331			3154.57	1.777	0.5865			3154.57	0.00438	2.45103
	3575.26	0.00515	1.54007			3139.72	0.0044	1.01645			3139.72	0.75684	0.40922			3139.72	0.84924	0.31681			3139.72	0.68203	1.38376			3139.72	0.83164	0.44002			3139.72	1.72928	0.61603			3139.72	0.0044	2.45092
	3571.43	0.00509	1.62444			3125	0.00436	0.96251			3125	0.75346	0.41811			3125	0.9059	0.31358			3125	0.70555	1.28611			3125	0.78395	0.43553			3125	1.40675	0.6228			3125	0.00436	2.12973
	3567.61	2.12838	1.51882			3110.42	0.00424	0.89008			3110.42	0.74597	0.39418			3110.42	0.7926	0.30941			3110.42	0.70783	1.18661			3110.42	1.07234	0.43232			3110.42	1.70387	0.5722			3110.42	0.00424	2.3905
	3563.79	1.89831	1.44213			3095.97	0.00414	1.00105			3095.97	0.62876	0.39711			3095.97	0.79836	0.28542			3095.97	0.61221	1.2374			3095.97	0.68667	0.40125			3095.97	1.33198	0.54603			3095.97	0.00414	2.83356
	3559.99	2.38331	1.29175			3081.66	0.00419	0.91319			3081.66	0.6074	0.40214			3081.66	0.62415	0.30998			3081.66	0.52781	1.25306			3081.66	0.50267	0.42308			3081.66	1.49545	0.54456			3081.66	0.00419	2.11961
	3556.19	2.65732	1.40819			3067.49	0.00402	0.85652			3053.43	0.47905	0.38646			3053.43	0.41464	0.28984			3053.43	0.55553	1.25051			3053.43	0.61189	0.40658			3053.43	1.41701	0.55151			3053.43	0.00403	2.07318
	3552.4	2.36809	1.38215			3053.43	0.00403	0.8816			3025.72	0.39073	0.38675			3025.72	0.58211	0.27909			3025.72	0.53427	1.16209			3025.72	0.75356	0.41466			3025.72	1.06854	0.54623			3025.72	0.00399	2.14904
	3548.62	2.32155	1.35047			3039.51	0.00404	0.90862			3012.05	0.51917	0.37315			3012.05	0.58406	0.31231			3012.05	0.55973	1.19774			3012.05	0.44616	0.41371			3012.05	1.27764	0.57595			3012.05	0.00406	2.46199
	3544.84	2.28137	1.35553			3025.72	0.00399	0.93696			2985.07	0.56455	0.40439			2985.07	0.53652	0.30029			2985.07	0.60859	1.13628			2985.07	0.66464	0.4164			2985.07	1.27323	0.54453			2985.07	0.004	2.04598
	3541.08	2.24539	1.41113			3012.05	1.15596	0.88015			2971.77	0.51205	0.4389			2971.77	0.67054	0.28447			2971.77	0.60958	1.16889			2971.77	0.54456	0.41451			2971.77	1.12975	0.56081			2971.77	0.00406	2.52365
	3537.32	2.2992	1.23426			2998.5	0.89927	0.8304			2958.58	0.56934	0.4026			2958.58	0.54901	0.30094			2958.58	0.54087	1.2165			2958.58	0.63034	0.39854			2958.58	1.34608	0.58561			2958.58	0.00407	2.01302
	3533.57	1.98966	1.35638			2985.07	0.99696	0.88485			2919.71	0.82519	0.41039			2919.71	0.71929	0.32214			2919.71	0.78107	1.21849			2919.71	1.04583	0.43687			2919.71	1.53566	0.60014			2919.71	0.00441	2.40939
	3529.83	2.37413	1.34472			2971.77	1.15007	0.94688			2906.98	1.12218	0.40968			2906.98	0.99749	0.31172			2906.98	1.00194	1.24668			2906.98	1.09991	0.43195			2906.98	1.66545	0.64124			2906.98	0.00445	2.65849
	3526.09	1.54503	1.52477			2958.58	1.33795	0.95161			2894.36	1.48973	0.4478			2894.36	1.43652	0.31923			2894.36	1.36558	1.25826			2894.36	1.16606	0.41234			2894.36	1.50746	0.68279			2894.36	0.00443	3.09473
	3522.37	1.97447	1.77526			2945.51	1.4126	0.96521			2881.84	1.33339	0.43558			2881.84	1.36895	0.30224			2881.84	1.61341	1.31251			2881.84	1.06227	0.48002			2881.84	1.79564	0.63559			2881.84	3.13348	2.59568
	3518.65	2.07027	1.793			2932.55	1.33831	0.94241			2857.14	1.11646	0.43546			2857.14	1.02844	0.32891			2857.14	1.33882	1.31471			2857.14	1.15815	0.47716			2857.14	1.76039	0.63003			2857.14	3.33084	2.26997
	3514.94	0.0059	1.86559			2919.71	1.82249	0.91786			2844.95	0.96317	0.47214			2844.95	0.97734	0.34467			2844.95	1.19925	1.39424			2844.95	0.94429	0.5288			2844.95	1.2323	0.68933			2844.95	2.98395	2.29934
	3511.24	0.00567	1.83767			2906.98	1.70998	0.94405			2832.86	0.69478	0.4616			2832.86	0.77091	0.35691			2832.86	0.97078	1.33225			2832.86	0.98506	0.47587			2832.86	1.75597	0.64719			2832.86	2.41743	2.38412
	3507.54	0.00545	1.65101			2894.36	1.28134	0.93551			2820.87	0.49161	0.48206			2820.87	0.45819	0.34365			2820.87	0.64911	1.48265			2820.87	0.78752	0.49638			2820.87	1.32686	0.73979			2820.87	0.00477	2.87804
	3503.85	0.00526	1.57851			2881.84	0.00444	1.02671			2808.99	0.37762	0.4437			2808.99	0.40122	0.33985			2808.99	0.54282	1.43008			2808.99	0.37762	0.50034			2808.99	1.52935	0.62307			2808.99	0.00472	3.19086
	3500.18	0.00506	1.51367			2869.44	0.00463	0.9348			2797.2	0.25933	0.48025			2797.2	0.48505	0.35058			2797.2	0.54748	1.36292			2797.2	0.47545	0.47064			2797.2	1.37831	0.65794			2797.2	0.0048	2.84307
	3496.5	0.0049	1.55313			2857.14	0.00463	1.07939			2773.93	0.39957	0.48241			2773.93	0.38008	0.3752			2773.93	0.5019	1.42025			2773.93	0.64808	0.50677			2773.93	1.60315	0.77965			2773.93	0.00487	2.94803
	3492.84	0.00475	1.50059			2844.95	0.00472	1.10954			2751.03	0.37297	0.48438			2751.03	0.36813	0.36329			2751.03	0.47469	1.31892			2751.03	0.56188	0.5086			2751.03	1.34658	0.67329			2751.03	0.00484	2.543
	3489.18	0.00467	1.47075			2832.86	0.00476	1.1421			2739.73	0.29044	0.45986			2739.73	0.3098	0.37757			2739.73	0.49858	1.37375			2739.73	0.43566	0.49374			2739.73	1.50543	0.70189			2739.73	0.00484	2.42999
	3485.53	0.00466	1.48801			2820.87	0.00477	0.96412			2706.36	0.30713	0.46313			2706.36	0.00488	0.35588			2706.36	0.46313	1.42091			2706.36	0.00488	0.54601			2706.36	1.65752	0.70201			2706.36	0.00488	2.56428
	3481.89	0.00468	1.41786			2808.99	0.00472	1.09981			2673.8	0.24093	0.48186			2673.8	0.21259	0.35904			2673.8	0.43462	1.39505			2673.8	0.7228	0.51966			2673.8	1.45504	0.68028			2673.8	0.00472	2.90064
	3478.26	0.00467	1.49475			2797.2	0.0048	1.03253			2663.12	0.22534	0.47465			2663.12	0.2589	0.35959			2663.12	0.38356	1.39743			2663.12	0.00479	0.51781			2663.12	1.24657	0.72397			2663.12	0.00479	3.26985
	3474.64	0.00468	1.45565			2785.51	0.00473	1.14068			2642.01	0.00471	0.48013			2642.01	0.20241	0.35304			2642.01	0.37187	1.46224			2642.01	0.44248	0.48955			2642.01	1.26623	0.71549			2642.01	0.00471	3.03143
	3471.02	0.00472	1.431			2773.93	0.00487	1.03303			2621.23	0.00479	0.51233			2621.23	0.37826	0.34475			2621.23	0.45966	1.46903			2621.23	0.42136	0.51233			2621.23	1.31674	0.67992			2621.23	0.00479	2.46111
	3467.41	0.00475	1.47881			2762.43	0.00485	1.12055			2610.97	0.00469	0.52074			2610.97	0.00469	0.35185			2610.97	0.45506	1.40334			2610.97	0.53012	0.45037			2610.97	1.36986	0.66617			2610.97	0.00469	2.52862
	3463.8	0.0048	1.525			2751.03	0.00484	1.22548			2600.78	0.00479	0.5027			2600.78	0.45961	0.34471			2600.78	0.3495	1.43215			2600.78	0.39737	0.50749			2600.78	1.12031	0.68942			2600.78	0.00479	2.79119
	3460.21	0.00481	1.50641			2739.73	0.00484	1.22468			2590.67	0.33783	0.45196			2590.67	0.26935	0.3287			2590.67	0.36522	1.40066			2590.67	0.00457	0.49762			2590.67	1.4472	0.60719			2590.67	0.00457	2.38765
	3456.62	1.57599	1.39712			2728.51	0.00484	1.13151			2570.69	0.29246	0.45494			2570.69	0.00464	0.3296			2570.69	0.45958	1.35304			2570.69	0.35745	0.4735			2570.69	1.1884	0.69633			2570.69	0.00464	2.85959
	3444.71	0.00503	1.53831			2717.39	0.0048	1.09967			2560.82	0.17529	0.4336			2560.82	0.29522	0.34135			2560.82	0.38286	1.32678			2560.82	0.58582	0.47973			2560.82	1.43458	0.6504			2560.82	0.00461	3.7871
	3432.89	1.59587	1.44592			2706.36	0.00488	1.15051			2551.02	0.20374	0.48619			2551.02	0.00463	0.34264			2551.02	0.3056	1.27855			2551.02	0.65288	0.48156			2551.02	1.58358	0.62973			2551.02	0.00463	2.81062
	3421.14	0.00555	1.63129			2695.42	0.00471	0.96161			2541.3	0.26385	0.43216			2541.3	0.42762	0.34118			2541.3	0.41852	1.3259			2541.3	0.70056	0.46401			2541.3	1.32379	0.65507			2541.3	0.00455	2.92052
	3409.48	1.76905	1.68481			2684.56	0.00473	1.15808			2522.07	0.28078	0.49252			2522.07	0.39586	0.33142			2522.07	0.35903	1.28865			2522.07	0.52474	0.47871			2522.07	1.42692	0.64442			2522.07	0.0046	3.31415
	3397.89	0.00588	1.81075			2673.8	0.00472	1.01569			2503.13	0.00463	0.45365			2503.13	0.35181	0.34718			2503.13	0.36569	1.27819			2503.13	0.74065	0.46753			2503.13	1.55999	0.63881			2503.13	0.00463	3.21256
	3386.39	0.00599	1.8703			2663.12	0.00479	1.11232			2493.77	0.00463	0.46748			2493.77	0.00463	0.35177			2493.77	0.39342	1.2603			2493.77	0.00463	0.50914			2493.77	1.33301	0.67114			2493.77	0.00463	3.23071
	3374.96	0.00617	2.05345			2652.52	0.00465	0.9896			2475.25	0.2398	0.44668			2475.25	0.0047	0.36205			2475.25	0.39026	1.31634			2475.25	0.58303	0.4984			2475.25	1.5093	0.66297			2475.25	0.0047	2.55782
	3363.61	0.00628	2.10226			2642.01	0.00471	1.12031			2466.09	0.00473	0.52031								2466.09	0.35949	1.41495			2466.09	0.00473	0.51085			2466.09	1.49945	0.65749			2466.09	0.00473	2.56373
	3352.33	0.00623	1.96339			2631.58	0.00478	1.09951			2457	0.00491	0.54007								2457	0.31914	1.39337			2457	0.00491	0.55971			2457	1.07033	0.68737			2457	0.00491	3.53012
	3341.13	0.00625	1.88627			2621.23	0.00479	1.09649			2447.98	0.25358	0.49721								2447.98	0.35799	1.4492			2447.98	0.00497	0.54196			Inf	--	--			2447.98	0.00497	2.95841
	3330	0.00617	1.93109			2610.97	0.00469	1.18221			2439.02	0.39546	0.52386								2439.02	0.4006	1.53631			2439.02	0.64198	0.55467			Inf	--	--			2439.02	0.00514	3.30235
	3318.95	0.0059	1.84132			2600.78	0.00479	0.99583			2430.13	0.00525	0.5937								2430.13	0.42032	1.45075			2430.13	0.00525	0.58319			Inf	--	--			2430.13	0.00525	3.68828
	3307.97	1.78068	1.77506			2587.32	0.00458	0.94786			2403.85	0.00591	0.65633								2403.85	0.49077	1.74607			2403.85	1.11753	0.57355			Inf	--	--			2403.85	0.00591	4.00301
	3297.07	0.00532	1.75509			2574	0.00466	1.08213			2395.21	0.27568	0.61454								2395.21	0.49393	1.60791			2395.21	0.53413	0.59731			Inf	--	--			2395.21	0.00574	3.56087
	3286.23	0.00513	1.63137			2560.82	0.00461	1.0471			2378.12	0.00705	0.65565								2378.12	0.59925	2.05484			Inf	--	--			Inf	--	--			2378.12	0.00705	5.24522
	3275.47	0.00486	1.60937			2547.77	0.00458	1.07196			2361.28	0.48783	0.8351								2361.28	0.64493	2.37823			Inf	--	--			Inf	--	--			2361.28	0.00827	6.06897
	3264.77	0.00464	1.48147			2534.85	0.00452	1.04386			2352.94	0.39872	0.73837								2352.94	0.64977	2.12379			Inf	--	--			Inf	--	--			2352.94	0.00738	5.14646
	3254.15	0.00453	1.52294			2522.07	0.0046	1.16455			2320.19	0.00806	0.79749								2320.19	0.55583	2.22432			Inf	--	--			Inf	--	--			2320.19	0.00806	5.27634
	3243.59	0.00437	1.45057			2509.41	0.00463	1.09624			2312.14	0.38928	0.68294								2312.14	0.5327	1.93816			Inf	--	--			Inf	--	--			2312.14	0.00683	4.93086
	3233.11	0.00425	1.39549			2496.88	0.00465	1.13897			2304.15	0.29016	0.64341								2304.15	0.4037	1.86272			Inf	--	--			Inf	--	--			2304.15	0.00631	4.60476
	3222.69	0.00417	1.35225			2484.47	0.00464	0.9604			2296.21	0.00626	0.68267								2296.21	0.47599	1.80143			Inf	--	--			Inf	--	--			2296.21	0.00626	5.09809
	3212.34	0.00422	1.28182			2472.19	0.00473	1.03503			2265.01	0.12746	0.63091								2265.01	0.45247	1.80857			Inf	--	--			Inf	--	--			2265.01	0.00637	4.14233
	3202.05	0.0043	1.37925			2460.03	0.00486	1.14637			Inf	--	--													Inf	--	--			Inf	--	--
	3191.83	0.00436	1.43408			2447.98	0.00497	1.248			Inf	--	--													Inf	--	--			Inf	--	--
	3181.67	1.33741	1.33307			2436.05	0.00523	1.19875			Inf	--	--													Inf	--	--			Inf	--	--
	3171.58	1.34514	1.24661			2424.24	0.00528	1.31912			Inf	--	--													Inf	--	--			Inf	--	--
	3161.55	0.00433	1.31566			2412.55	0.0056	1.3502			Inf	--	--													Inf	--	--			Inf	--	--
	3151.59	1.39816	1.29735			2400.96	0.00586	1.46556			Inf	--	--													Inf	--	--
	3141.69	0.00441	1.34492			2389.49	0.00594	1.40083			Inf	--	--													Inf	--	--
	3131.85	1.3178	1.26561			2378.12	0.00705	1.67791			Inf	--	--													Inf	--	--
	3122.07	0.00431	1.39124			2366.86	0.00878	2.22148			Inf	--	--													Inf	--	--
	3112.36	0.00426	1.30848			2355.71	0.00745	1.70639			Inf	--	--													Inf	--	--
	3102.7	0.0042	1.32143			2344.67	0.00849	2.25015			Inf	--	--													Inf	--	--
	3093.1	0.00416	1.3018			2333.72	0.00823	2.58283			Inf	--	--													Inf	--	--
	3083.57	0.00412	1.24909			2322.88	0.00882	3.42371			Inf	--	--													Inf	--	--
	3074.09	0.00401	1.18214								Inf	--	--
	3064.66	0.00398	1.26695								Inf	--	--
	3055.3	0.00406	1.29651								Inf	--	--
	3045.99	0.00405	1.27715								Inf	--	--
	3036.74	0.00401	1.34892								Inf	--	--
	3027.55	0.00398	1.27006								Inf	--	--
	3022.97	0.00404	1.1764								Inf	--	--
	3018.41	0.00403	1.18867								Inf	--	--
	3013.86	0.00403	1.34299								Inf	--	--
	3009.33	0.00405	1.33305								Inf	--	--
	3004.81	0.00403	1.22034								Inf	--	--
	3000.3	0.00407	1.22793								Inf	--	--
	2995.81	0.004	1.20845								Inf	--	--
	2991.32	0.004	1.19454								Inf	--	--
	2986.86	0.00404	1.34248								Inf	--	--
	2982.4	0.00404	1.30203								Inf	--	--
	2977.96	0.00407	1.33252								Inf	--	--
	2969.12	0.00412	1.37902								Inf	--	--
	2964.72	1.39286	1.29337								Inf	--	--
	2960.33	0.00407	1.30688
	2955.96	0.0041	1.27149
	2951.59	0.00411	1.37579
	2947.24	0.0041	1.26701
	2942.91	1.45424	1.33621
	2938.58	0.00424	1.28783
	2934.27	0.00425	1.38399
	2929.97	0.00427	1.36348
	2925.69	0.00427	1.31947
	2921.41	0.0044	1.4871
	2917.15	1.47646	1.37099
	2912.9	0.0044	1.46996
	2908.67	0.00446	1.41458
	2900.23	0.00438	1.44238
	2896.03	0.00444	1.42441
	2891.84	1.39814	1.3222
	2887.67	0.00451	1.49343
	2879.36	1.47103	1.41325
	2875.22	0.0046	1.48655
	2871.09	1.47926	1.4468
	2866.97	0.00463	1.54069
	2862.87	1.49196	1.46372
	2858.78	0.00469	1.42455
	2854.7	0.00466	1.43145
	2850.63	0.00471	1.49888
	Inf	--	--
	Inf	--	--
	Inf	--	--
	Inf	--	--
	Inf	--	--

## Sheet: Figure_S4
Na4Cl(C2HO3)2(H2O)+	wavenumber [cm-1]	σ 10-20 cm2	Noise		Na5Cl2(C2HO3)2(H2O)+	wavenumber [cm-1]	σ 10-20 cm2	Noise		Na4Cl(C2HO3)2(H2O)2+	wavenumber [cm-1]	σ 10-20 cm2	Noise		Na5Cl2(C2HO3)2(H2O)2+	wavenumber [cm-1]	σ 10-20 cm2	Noise
	3846.15	0.00466	0.22831			3846.15	0.00466	0.23297			3846.15	0.00466	0.27956			3846.15	0.00466	0.03728
	3824.09	0.00468	0.22483			3824.09	0.00468	0.17799			3834.36	0.00474	0.33625			3824.09	0.04215	0.03279
	3802.28	0.00485	0.2329			3802.28	0.00485	0.18923			3822.63	0.0047	0.25401			3802.28	0.04367	0.03396
	3780.72	0.00487	0.2143			3780.72	0.00487	0.1802			3810.98	0.00472	0.23121			3780.72	0.0487	0.03409
	3759.4	0.00522	0.24022			3759.4	0.00522	0.24545			3799.39	0.00495	0.27715			3759.4	0.00522	0.03656
	3738.32	0.0056	0.21855			3738.32	0.0056	0.21855			3787.88	0.00478	0.27266			3738.32	0.05604	0.04483
	3717.47	0.00553	0.27651			3717.47	0.00553	0.19909			3776.43	0.00494	0.28173			3717.47	0.10508	0.03871
	3696.86	0.00541	0.29225			3696.86	0.00541	0.24895			3765.06	0.00512	0.27157			3696.86	0.22189	0.03788
	3676.47	0.59671	0.27808			3676.47	0.31863	0.26649			3753.75	0.00543	0.2931			3676.47	0.69519	0.04635
	3656.31	1.46589	0.28865			3656.31	1.46589	0.23205			3742.51	0.00583	0.30906			3656.31	6.07297	0.04528
	3636.36	3.50672	0.29709			3636.36	2.32367	0.18038			3731.34	0.00571	0.2796			3636.36	3.09822	0.04244
	3616.64	0.00547	0.34439			3616.64	0.22413	0.20226			3720.24	0.00557	0.33417			3616.64	0.39905	0.03827
	3597.12	0.00518	0.31108			3597.12	0.00518	0.18665			3709.2	0.00564	0.27054			3597.12	0.33182	0.03629
	3577.82	0.00517	0.25854			3577.82	0.00517	0.26888			3698.22	0.00543	0.32031			3577.82	0.32575	0.04137
	3558.72	0.42602	0.24615			3558.72	0.20828	0.17988			3687.32	0.00567	0.35137			3558.72	0.50176	0.0426
	3539.82	0.34615	0.18639			3539.82	0.48373	0.15532			3676.47	0.52719	0.3476			3539.82	0.76775	0.03107
	3521.13	0.0061	0.27434			3521.13	0.506	0.23166			3665.69	1.23106	0.34196			3521.13	0.8413	0.05487
	3502.63	0.0052	0.2652			3502.63	0.0052	0.2236			3654.97	3.55724	0.34095			3502.63	0.82679	0.0364
	3484.32	0.00468	0.24327			3484.32	0.00468	0.16842			3644.32	7.75735	0.33068			3484.32	0.72046	0.03743
	3466.2	0.00478	0.23421			3466.2	0.00478	0.1673			3633.72	5.21719	0.31068			3466.2	0.57358	0.05258
	3448.28	0.25777	0.21811			3448.28	0.00496	0.17846			3623.19	0.74836	0.3015			3448.28	0.5205	0.04461
	3430.53	0.0054	0.26477			3430.53	0.0054	0.19993			3612.72	0.36834	0.33042			3430.53	0.42688	0.04863
	3412.97	0.00559	0.27387			3412.97	0.00559	0.17885			3602.3	0.38906	0.31644			3412.97	0.38566	0.06707
	3395.59	0.0059	0.32441			3395.59	0.0059	0.21824			3591.95	0.38077	0.28167			3395.59	0.28902	0.05898
	3378.38	0.0061	0.2502			3378.38	0.0061	0.23189			3581.66	0.00519	0.30101			3378.38	0.23189	0.07323
	3361.34	0.00627	0.32593			3361.34	0.00627	0.18804			3571.43	0.331	0.30045			3361.34	0.21938	0.06895
	3344.48	0.2923	0.27986			3344.48	0.00622	0.18036			3561.25	0.5338	0.25969			3344.48	0.18036	0.07463
	3327.79	0.0061	0.28668			3327.79	0.0061	0.22568			3551.14	0.54003	0.25629			3327.79	0.17079	0.07319
	3311.26	0.00574	0.32144			3311.26	0.00574	0.18942			3541.08	0.69225	0.25294			3311.26	0.14924	0.08036
	3294.89	0.00528	0.29037			3294.89	0.00528	0.17422			3531.07	0.6637	0.25175			3294.89	0.12671	0.08975
	3278.69	0.00495	0.27732			3278.69	0.00495	0.16838			3521.13	0.64012	0.32921			3278.69	0.16838	0.07924
	3262.64	0.00462	0.28175			3262.64	0.00462	0.15242			3511.24	0.363	0.32329			3262.64	0.13395	0.07852
	3246.75	0.00442	0.26049			3246.75	0.00442	0.14128			3501.4	0.00513	0.33334			3246.75	0.10155	0.07064
	3231.02	0.00422	0.23651			3231.02	0.00422	0.14782			3491.62	0.00472	0.29708			3231.02	0.09714	0.08447
	3215.43	0.00419	0.23901			3215.43	0.00419	0.12999			3481.89	0.00468	0.32756			3215.43	0.00419	0.10064
	3200	0.00431	0.2502			3200	0.00431	0.14667			3472.22	0.00471	0.31078			3200	0.09922	0.09059
	3184.71	0.00435	0.23935			3184.71	0.00435	0.15231			3462.6	0.27376	0.26896			3184.71	0.00435	0.10009
	3169.57	0.00429	0.24009			3169.57	0.00429	0.13291			3453.04	0.00487	0.30672			3169.57	0.00429	0.09432
	3154.57	0.00438	0.25386			3154.57	0.00438	0.13131			3443.53	0.00505	0.29292			3154.57	0.00438	0.12255
	3139.72	0.0044	0.25961			3139.72	0.0044	0.15401			3434.07	0.00532	0.34021			3139.72	0.0044	0.1144
	3125	0.00436	0.25261			3125	0.00436	0.13937			3424.66	0.00552	0.35324			3125	0.00436	0.11759
	3110.42	0.00424	0.2204			3110.42	0.00424	0.11868			3415.3	0.00555	0.33323			3110.42	0.11868	0.10596
	3095.97	0.00414	0.22338			3095.97	0.00414	0.12823			3405.99	0.37653	0.29666			3095.97	0.00414	0.10341
	3081.66	0.00419	0.25553			3081.66	0.00419	0.09635			3396.74	0.00589	0.36512			3081.66	0.00419	0.12986
	3053.43	0.00403	0.22946			3053.43	0.00403	0.11674			3387.53	0.3101	0.3101			3053.43	0.00403	0.12882
	3025.72	0.00399	0.23922			3025.72	0.00399	0.10366			3378.38	0.0061	0.37225			3025.72	0.00399	0.11164
	3012.05	0.00406	0.21091			3012.05	0.00406	0.10546			3369.27	0.00626	0.37577			3012.05	0.00406	0.12574
	2985.07	0.004	0.2082			2985.07	0.004	0.1081			3360.22	0.00628	0.3452			2985.07	0.004	0.13213
	2971.77	0.00406	0.21945			2971.77	0.09753	0.09347			3351.21	0.00622	0.34224			2971.77	0.00406	0.13411
	2958.58	0.00407	0.21147			2958.58	0.00407	0.10573			3342.25	0.00625	0.34983			2958.58	0.00407	0.1342
	2919.71	0.00441	0.23388			2919.71	0.00441	0.10591			3333.33	0.00624	0.36168			2919.71	0.00441	0.15004
	2906.98	0.00445	0.25383			2906.98	0.00445	0.12023			3324.47	0.35322	0.32328			2906.98	0.00445	0.18258
	2894.36	0.00443	0.23942			2894.36	0.00443	0.14188			3315.65	0.36416	0.3113			2894.36	0.37243	0.14631
	2881.84	0.00444	0.23557			2881.84	0.00444	0.12445			3306.88	0.00558	0.33454			2881.84	0.55114	0.16445
	2857.14	0.22237	0.21773			2857.14	0.00463	0.13434			3298.15	0.00535	0.29411			2857.14	0.41693	0.2131
	2844.95	0.00472	0.27857			2844.95	0.00472	0.10859			3289.47	0.30081	0.26969			2844.95	0.24552	0.16997
	2832.86	0.30456	0.26173			2832.86	0.43304	0.10945			3280.84	0.34637	0.28111			2832.86	0.00476	0.19987
	2820.87	2.47235	0.23387			2820.87	2.37212	0.10978			3272.25	0.35379	0.31076			2820.87	0.00477	0.2291
	2808.99	0.33041	0.20769			2808.99	0.36818	0.11328			3263.71	0.38417	0.26383			2808.99	0.00472	0.18881
	2797.2	0.0048	0.24493			2797.2	0.0048	0.12967			3255.21	0.37815	0.25058			2797.2	0.0048	0.17289
	2773.93	0.00487	0.24851			2773.93	0.00487	0.11207			3246.75	0.00442	0.25608			2773.93	0.00487	0.20466
						2751.03	0.00484	0.13078			3238.34	0.3869	0.24504			2751.03	0.00484	0.17438
						2739.73	0.00484	0.1307			3229.97	0.00422	0.32458			2739.73	0.00484	0.21299
						2706.36	0.00488	0.117			3221.65	0.3544	0.23765			2706.36	0.00488	0.23888
						2673.8	0.00472	0.12283			3213.37	0.24819	0.22715			2673.8	0.00472	0.20314
						2663.12	0.00479	0.11986			3205.13	0.32911	0.2308			2663.12	0.00479	0.27808
						2642.01	0.00471	0.12709			3196.93	0.29996	0.23475			2642.01	0.00471	0.16946
						2621.23	0.00479	0.09576			3188.78	0.00436	0.27906			2621.23	0.00479	0.21068
						2610.97	0.00469	0.09383			3180.66	0.00434	0.25617			2610.97	0.00469	0.22518
						2600.78	0.00479	0.11969			3172.59	0.00429	0.24449			2600.78	0.00479	0.22502
						2590.67	0.00457	0.10044			3164.56	0.00431	0.25414			2590.67	0.00457	0.17348
						2570.69	0.00464	0.10213			3156.57	0.00437	0.27512			2570.69	0.00464	0.25532
						2560.82	0.00461	0.09687			3148.61	0.23224	0.21033			2560.82	0.00461	0.23064
						2551.02	0.00463	0.11113			3140.7	0.00441	0.26468			2551.02	0.00463	0.22689
						2541.3	0.00455	0.10463			3132.83	0.00436	0.26592			2541.3	0.00455	0.23655
						2522.07	0.0046	0.08746			3125	0.00436	0.27003			2522.07	0.0046	0.22555
						2503.13	0.00463	0.09721			3117.21	0.00427	0.29466			2503.13	0.00463	0.23608
						2493.77	0.00463	0.09257			3109.45	0.00422	0.22777			2493.77	0.00463	0.2268
						2475.25	0.0047	0.08934			3101.74	0.24268	0.20503			2475.25	0.0047	0.32913
						2466.09	0.00473	0.0946			3094.06	0.0041	0.28686			2466.09	0.00473	0.22232
						2457	0.00491	0.0982			3086.42	0.00411	0.2463			2457	0.00491	0.22094
						2447.98	0.00497	0.13922			3078.82	0.00417	0.27909			2447.98	0.00497	0.24861
						2439.02	0.00514	0.07704			3071.25	0.00404	0.27461			2439.02	0.00514	0.22598
						2430.13	0.00525	0.09983			3063.72	0.00399	0.21941			2430.13	0.00525	0.28371
						2403.85	0.00591	0.11234			3056.24	0.00407	0.21985			2403.85	0.00591	0.33112
						2395.21	0.00574	0.10912			3048.78	0.00399	0.21519			2395.21	0.00574	0.3044
						2378.12	0.00705	0.141			3041.36	0.19148	0.19148			2378.12	0.00705	0.44415
						2361.28	0.00827	0.16537			3033.98	0.00404	0.25074			2361.28	0.00827	0.4713
						2352.94	0.00738	0.15506			3026.63	0.00397	0.2262			2352.94	0.00738	0.4061
						2320.19	0.00806	0.15305			3019.32	0.00403	0.23784			2320.19	0.00806	0.45111
						2312.14	0.00683	0.12293			3012.05	0.00406	0.21497			2312.14	0.00683	0.4644
						2304.15	0.00631	0.10723			3004.81	0.00403	0.21346			2304.15	0.00631	0.34693
						2296.21	0.00626	0.11273			2997.6	0.00404	0.21809			2296.21	0.00626	0.30689
											2990.43	0.00404	0.24667			2265.01	0.00637	0.32501
											2983.29	0.29229	0.23623
											2976.19	0.25734	0.20832
											2969.12	0.25934	0.24699
											2962.09	0.00412	0.25568
											2955.08	0.29575	0.25056
											2948.11	0.27303	0.23228
											2941.18	0.27011	0.25323
											2934.27	0.28869	0.22925
											2927.4	0.29813	0.25553
											2913.75	0.00444	0.26211
											2906.98	0.32508	0.24492
											2900.23	0.00438	0.26743
											2886.84	0.00451	0.23896
											2880.18	0.00444	0.2619
											2866.97	0.00463	0.24984
											2853.88	0.00463	0.25921
											2847.38	0.00462	0.26796
											2840.91	0.00482	0.26534
											2828.05	0.00487	0.32157
											2821.67	0.00476	0.30478
											2815.32	0.0048	0.3218
											2808.99	0.00472	0.27377
											2802.69	0.00485	0.25206
											2790.18	0.0047	0.25853
											2783.96	0.00478	0.27699
											2777.78	0.00483	0.31884
											2771.62	0.00485	0.30546
											2753.3	0.00479	0.25864
											2747.25	0.00482	0.27492
											2741.23	0.00478	0.31076
											2735.23	0.00478	0.27268
											2729.26	0.0048	0.25903
											2723.31	0.0048	0.23997
											2699.78	0.00484	0.26113
											2693.97	0.0048	0.28294
											2688.17	0.0048	0.27831
											2676.66	0.00472	0.28775
											2670.94	0.00487	0.35036
											2665.24	0.00479	0.27804
											2653.93	0.00466	0.25625
											2648.3	0.00475	0.2942
											2642.71	0.00471	0.30173
											2637.13	0.00482	0.31815
											2626.05	0.00481	0.28381
											2615.06	0.00479	0.24422
											2604.17	0.00476	0.28057
											2598.75	0.00478	0.28694
											2587.99	0.00454	0.23177
											2577.32	0.00462	0.2821
											2572.02	0.00465	0.2557
											2566.74	0.00459	0.24768
											2556.24	0.00463	0.25444
											2551.02	0.00463	0.25467
											2545.82	0.00453	0.26748
											2525.25	0.00459	0.24309
											2520.16	0.00468	0.2574
											2515.09	0.00462	0.24928
											2510.04	0.00459	0.25684
											2505.01	0.00466	0.27057
											2500	0.00463	0.25443
											2495.01	0.00464	0.25034
											2490.04	0.00453	0.24033
											2485.09	0.00464	0.28308
											2480.16	0.00461	0.22583
											2475.25	0.0047	0.27741
											2455.8	0.00492	0.30031
											2450.98	0.00494	0.31102
											2446.18	0.00501	0.28044
											2431.91	0.00524	0.27794
											2427.18	0.00525	0.29932
											2417.8	0.00547	0.31156
											2413.13	0.00558	0.279
											2403.85	0.00591	0.30747
											2399.23	0.0058	0.34788
											2390.06	0.00592	0.29014
											2380.95	0.00663	0.38426
											2371.92	0.008	0.41595
											2362.95	0.00851	0.47645
											2354.05	0.00736	0.39016
											2345.22	0.00848	0.51743
											2340.82	0.00874	0.50698
											2332.09	0.00809	0.49376
											2327.75	0.00792	0.46701
											2319.11	0.00762	0.3965
											2314.82	0.00682	0.40222
											2302.03	0.00623	0.33659
											2297.79	0.00621	0.37885
											2285.19	0.00622	0.40398
											2281.02	0.00619	0.35888
											2276.87	0.00619	0.3094
											2240.14	0.00673	0.32308
